# Supplementary material for: Reduced nuclear DNA methylation and mitochondrial transcript changes in adenomas do not associate with mtDNA methylation
Source: Biomark Res. 2018 Dec 29;6:37. doi: 10.1186/s40364-018-0151-x (PMC6311003; doi:10.1186/s40364-018-0151-x)
Supplement: Supplementary file 3 — Supplementary data. Nuclear and mtDNA RNA-seq gene expression levels. WGBS read counts. (XLSX 10324 kb) [file 40364_2018_151_MOESM3_ESM.xlsx]

## Sheet: Nuclear RNAseq Expression
id	Symbol	G_NG_G1	G_NG_G2	G_NG_NG1	ISTA01_IIa	ISTA01_Is	ISTA01_N	ISTA02_Iia	ISTA02_Is	ISTA02_N	ISTA03_Iia	ISTA03_Is	ISTA03_N	ISTA04_IsA	ISTA04_IsB	ISTA04_N	ISTA05_IIa	ISTA05_Is	ISTA05_N
NM_001025603	RFX5	18.7172	18.9019	14.3331	17.9164	22.2203	12.0274	15.6763	7.73396	12.8765	15.773	17.7376	11.9353	16.2236	16.5414	12.7306	17.1325	15.4954	9.58376
NM_021107	MRPS12	17.841	20.5097	23.3856	19.3239	37.432	12.8501	12.7324	6.62911	15.6723	14.008	20.9001	15.8452	12.3772	11.4578	8.5179	15.0121	10.9379	6.3422
NR_073207	SEL1L2	0	0	0	0	0	0	0	0	0	0	0	0	0	0	0	0	0	0.140938
NR_036579	APTX	14.0905	14.7305	17.1538	14.3027	35.5737	12.38	17.4059	12.1534	16.0267	16.0735	14.9876	14.4047	17.4804	19.357	14.0731	16.4539	15.7992	13.1072
NM_173803	MPV17L	9.39366	9.34234	3.80466	8.17841	6.05284	3.40841	1.28796	0.828639	6.61546	6.00877	9.38444	8.93092	6.20764	4.30155	8.42532	5.80977	6.60832	6.01334
NM_139008	HFE	2.73398	3.17205	2.19752	2.58666	2.30964	2.7424	3.38549	3.59077	2.00826	2.66639	2.71564	2.9221	2.93244	3.71497	3.37938	2.28998	2.65852	2.44292
NM_001253902	MEST	22.2924	29.0264	29.5517	25.3341	34.087	13.9079	27.5991	10.4961	17.2474	35.3766	35.2003	20.4958	35.3416	36.133	18.3783	40.3291	38.2827	22.7849
NM_170771	ALDH8A1	0.140204	0.304169	0.131195	0.190196	0.0530951	0.0783543	0.257592	0.552426	0.0787554	0.112664	0.137501	0.0411563	0.0761673	0	0.231465	0	0.455746	0.281875
NM_001031696	PLD3	50.7538	34.7622	42.4745	43.2885	39.7151	30.088	25.3176	21.8208	29.297	23.1713	29.7346	28.2744	33.0566	32.1443	24.6278	20.313	21.9518	22.597
NM_182607	VSIG1	0.105153	0.0434528	0.131195	0.190196	1.00881	0.0783543	0.0735977	0	0.748177	0.0751097	0.0343752	0.0823126	0.304669	0.742995	0	0	0.151915	0.0939584
NM_017722	TRMT1	10.2349	8.60365	10.5612	10.0804	19.831	5.68069	6.07181	10.7723	4.88284	8.03673	4.81253	6.2146	8.34032	9.26788	4.12007	12.3829	12.2292	4.18115
NM_018283	NUDT15	13.4946	10.7328	11.9716	9.39567	17.7603	12.3016	9.82529	4.14319	13.9003	11.4542	16.3282	17.9853	12.0725	9.18967	14.6286	12.5949	8.50727	12.0737
NR_024406	LOC732275	0	0	0	0	0	0	0	0	0	0	0	0	0	0	0	0	0	0
NM_001243512	ESRRG	8.16688	9.08163	7.21574	3.57568	0.663688	0.979429	0.110397	0.552426	0.708799	0	0.996882	0.617345	0.571255	0.39105	0.879566	3.81664	2.73448	2.16104
NM_014068	PSORS1C1	0	0.391075	0.131195	2.47254	1.75214	1.95886	0.478385	3.03834	0.0787554	2.77906	1.34063	1.85203	0.914008	1.32957	0.740687	0.0848141	0	0.234896
NM_001254729	AP4S1	0.70102	0.78215	1.21356	0.912939	0.690236	1.13614	0.846373	1.10485	1.26009	2.06552	1.82189	0.905439	1.71376	1.21225	1.2962	1.31462	1.59511	1.97313
NR_027467	LIMS3	10.4802	9.3858	9.01967	16.7753	20.123	7.56119	10.7453	7.45775	11.4589	1.01398	10.0719	8.68398	4.26537	6.10038	2.45353	5.13125	6.45641	5.44959
NR_024231	SNAR-B1	0	0	0	0	0	0	0	0	0	0	0	0	0	0	0	0	0	0
NM_001199672	CALU	69.436	72.4792	78.7171	68.6226	122.039	51.5963	66.5691	68.777	87.4579	69.0258	91.06	69.0191	67.2938	72.6962	62.4029	73.6187	86.212	71.2205
NR_026787	LMLN	13.0039	12.3406	8.82288	9.09135	12.7694	7.16942	9.01572	11.6009	6.5367	9.05071	8.80006	5.92651	12.5676	13.1784	6.48101	11.3651	12.7609	9.58376
NM_002115	HK3	1.47214	0.651791	2.8207	0.798822	0.292023	0.391771	0.220793	0	0.157511	0.375548	0.240627	0.246938	0.266586	0.46926	0.0925859	0.593699	0.607662	0.469792
NM_004504	AGFG1	63.6876	62.3113	59.497	66.6826	61.8823	53.5943	76.6152	66.8435	53.7506	73.1193	76.7599	56.6311	65.085	70.6627	59.5327	82.8634	77.249	68.9655
NM_001099746	SYBU	12.1627	12.0364	8.2325	14.0364	17.8399	21.0773	22.9625	13.2582	18.5075	16.1861	23.0314	18.9731	12.2629	17.1671	13.6564	22.4757	17.8501	13.7649
NM_001098408	GAGE12C	0	0	0	0	0	0	0	0	0	0	0	0	0	0.07821	0	0	0.227873	0
NM_022114	PRDM16	0.455663	0.434528	1.70554	0.684704	0.371665	0.940251	0.220793	1.38106	0.86631	0.488213	0.687505	1.52278	0.190418	0.273735	1.01844	0.0848141	0.151915	0.798647
NM_032125	TMEM222	10.1297	8.734	9.31486	6.77097	9.26509	9.99017	8.97892	8.5626	7.00923	2.96683	7.45943	8.35473	7.15973	4.80991	5.74032	6.31865	7.51982	6.24824
NM_001260512	MGST1	43.288	72.6096	48.3782	56.4881	66.6078	32.7913	41.5459	24.8592	58.3972	61.7026	71.9474	66.5909	63.0665	47.7472	51.6166	90.6239	66.0832	60.5092
NM_001011666	CREB5	2.69893	2.17264	9.93804	2.32039	3.53082	0.626834	0.95677	0.552426	0.590666	4.35636	3.23127	0.617345	5.56021	3.63676	1.15732	2.84127	1.29128	0.328855
NM_018905	PCDHA2	0.665969	0.78215	0.655976	1.63568	0.292023	1.21449	0.33119	1.65728	1.29946	0.262884	0.378128	1.19353	2.97052	4.14513	0.694394	0.593699	0.455746	0.187917
NM_080746	RPL10L	0.105153	0.434528	0.459183	0.342352	0	0.901074	1.61915	0.552426	1.02382	0.337993	0.859381	0.493876	0.190418	0.195525	1.01844	0.254442	0.0759577	0.563751
NM_001204837	ZNF568	0.175255	0.0869055	0.623177	0.722744	0.0530951	0.626834	0.147195	0	0.748177	0.150219	1.44376	1.02891	0.799757	1.25136	1.62025	0.551292	0.835535	1.17448
NM_001144994	C2orf72	17.4203	22.4216	16.6946	37.5066	25.7511	79.608	60.3133	25.1354	53.9081	32.9356	22.8939	64.9858	24.2212	23.6976	52.0333	28.6672	16.9386	61.3549
NM_017812	CHCHD3	22.5378	26.3324	27.0262	12.8953	32.0163	21.5474	17.2955	7.73396	24.6898	23.2089	26.6752	28.6448	20.8318	20.1	27.0814	28.3703	22.1797	27.107
NM_182626	C2orf48	0	0.173811	0.0655976	0.0380391	0.0530951	0	0	0	0	0	0	0.0411563	0.0380837	0	0	0	0.0759577	0.0939584
NM_001079840	OCIAD1	27.3398	36.1092	23.1232	30.4693	19.1408	37.8843	37.2036	17.1252	35.2824	53.065	39.0503	47.9883	50.3466	51.1493	51.5703	40.9652	35.5482	49.5631
NM_001170689	MIB2	4.94219	2.82443	3.87026	4.64077	5.62808	7.09106	4.26867	7.45775	2.44142	4.01837	3.09377	2.55169	2.74202	3.63676	2.49982	2.75646	1.82299	2.30198
NM_001202423	TRMT1L	12.4782	15.165	9.28206	12.5149	14.7604	14.9657	13.358	5.80047	13.3097	18.5521	13.2001	13.2523	18.7752	17.128	13.9342	16.1147	11.6975	15.6441
NM_006863	LILRA1	2.90923	1.60775	2.8535	1.40745	0.743331	0.470126	0.257592	0	0.354399	0.150219	0.618754	0.123469	0.875924	0.351945	0.370344	1.14499	0.987451	0.234896
NM_207044	ENSA	22.3625	21.2484	16.3338	14.0745	17.9196	20.9206	24.324	21.8208	20.437	17.9137	19.7314	20.4958	16.8711	19.2005	17.7302	17.5565	19.6731	22.0802
NR_024028	LINC00112	0	0	0	0	0	0	0	0	0	0	0	0	0	0	0	0	0	0
NM_001142614	EHBP1	45.6364	43.4093	32.5036	31.9529	28.5386	14.8481	23.7721	30.9359	13.5853	40.2212	25.2314	16.2979	39.6451	40.1999	20.3689	36.3004	27.1929	22.3621
NM_145272	C17orf50	0	0.0434528	0.0655976	0	0.10619	0	0.33119	0.828639	0	0	0	0.0823126	0.114251	0.07821	0	0	0	0.0939584
NM_001204466	RBM10	22.6429	21.596	26.2718	19.0196	26.7334	22.7619	21.4537	37.565	20.9883	20.0918	16.4314	17.4503	20.032	18.0274	19.2579	20.7795	20.8124	14.4226
NM_000756	CRH	0	0	0	0	0	0	0	0	0	0	0	0	0	0	0	0	0	0
NM_014423	AFF4	126.394	126.621	103.152	116.78	107.756	136.532	134.389	120.981	137.704	128.438	116.395	130.795	129.37	136.32	136.749	138.417	126.622	177.441
NM_020135	WRNIP1	24.2553	27.9836	18.9905	17.6121	33.8216	30.2839	28.3719	22.6495	23.981	22.7582	27.9814	30.0853	30.048	27.3344	27.3591	24.0872	28.3322	28.0936
NR_026580	TFDP1	49.3167	54.8374	65.3352	55.423	108.208	35.7687	41.5459	25.4116	63.2012	51.2623	72.9443	61.5698	61.467	47.2388	58.1439	66.2398	54.2338	62.0596
NM_207355	POTEB	0	0	0	0	0	0.0783543	0	0	0	0	0	0	0	0	0	0	0	0
NM_001271036	FCGR3B	8.62254	3.78039	8.79008	4.03215	2.84059	0.54848	0.515184	0	1.02382	0.450658	0.756255	0.370407	0.495087	0.07821	0.509222	0.932955	4.86129	0.422813
NM_001004124	OR4P4	0	0	0	0	0	0	0	0	0	0	0	0	0	0	0	0	0	0
NM_001099855	MCF2	0	0	0	0.0380391	0.0265475	0	0.0735977	0	0.236266	0	0.0343752	0.0823126	0	0	0	0	0	0
NM_001201363	HMGN3	8.02668	12.8186	7.67492	8.02626	8.86688	6.18999	7.35977	4.14319	5.86728	14.0455	8.83444	8.27242	13.5197	10.5975	8.98083	12.0012	13.1407	9.02001
NM_001242464	PPP1R1B	76.9369	84.2114	80.1275	76.6869	52.4579	88.1094	121.215	74.3013	70.5649	72.5559	102.885	106.224	84.9265	82.0814	69.2079	77.817	66.463	78.1734
NM_016524	SYT17	3.89066	1.99883	1.47595	2.92901	0.716783	5.56315	11.9228	12.7058	4.25279	8.71272	5.15629	6.33807	10.2064	10.3237	5.04593	2.62924	2.05086	8.08043
NM_016337	EVL	7.46586	6.90899	10.43	13.2757	4.24761	9.48087	5.33583	6.62911	8.78123	4.13103	3.3344	5.06223	4.95087	4.37976	4.81447	5.4281	5.46896	4.55698
NM_001242524	HLA-DPA1	187.978	108.458	186.199	349.846	121.216	117.766	127.361	19.0587	202.992	142.032	118.595	140.96	105.301	79.2658	115.64	80.8279	40.7893	151.931
NM_001122870	PPM1M	3.32984	4.51909	5.70699	6.84704	3.7432	4.77961	5.81422	4.41941	3.85902	3.75548	3.40315	3.04557	4.11303	4.61439	3.10163	2.4172	1.89894	2.77177
NM_078480	PUF60	26.9893	21.9871	26.3046	19.5141	30.4766	24.2898	19.4298	10.4961	21.7759	20.9556	25.0939	21.4424	18.2802	16.2677	17.8691	19.8889	21.1922	16.9595
NM_033505	EPT1	48.4054	54.0552	39.8834	34.1972	73.3774	43.9568	54.5359	25.4116	74.1876	53.5156	58.9879	70.5008	40.9399	31.9488	50.6908	52.1183	56.5126	56.61
NM_019886	CHST7	0.665969	0.434528	0.491982	1.02706	0.955711	0.744366	0.147195	0	0.669421	0.488213	0.446878	0.699657	0.304669	0.117315	0.648101	0.212035	0.531704	0.751668
NM_001283	AP1S1	3.61025	3.17205	3.60787	5.09724	4.96439	3.13417	3.60629	2.76213	3.58337	4.05592	3.3344	3.78638	3.77028	2.97198	1.9443	3.98626	5.24108	2.72479
NM_006526	ZNF217	82.0544	76.0858	61.0386	89.5061	69.1829	96.7284	96.229	81.4828	96.0029	62.341	82.0537	81.5307	64.8565	64.9534	99.1595	84.7293	75.1982	95.9786
NM_001080440	OTOL1	0	0	0	0	0	0	0	0	0	0	0	0	0	0	0	0	0	0
NR_026736	C6orf52	0.105153	0.130358	0.131195	0.0760783	0.0530951	0.195886	0.220793	0.276213	0.236266	0.375548	0.0687505	0.0411563	0	0.195525	0.277758	0.296849	0.303831	0.0939584
NM_001164238	NLGN4Y	0.595867	0.130358	0.524781	0	0	0	0.257592	0	0.708799	0.0751097	0.0687505	0.288094	0	0	0	0.0848141	0	0.469792
NR_002161	FAM224A	0.455663	0	0.0327988	0	0	0	0.0735977	0	0.826932	0	0	0.164625	0	0	0	0.636106	0.379789	0.0939584
NM_145894	KLK12	8.23698	10.1679	0.426385	1.0651	0.716783	0.195886	1.61915	1.38106	2.63831	1.76508	2.81877	1.317	0.83784	0.86031	0.648101	5.17366	5.46896	0.516771
NM_139353	TAF1C	8.7277	9.4727	13.3819	5.81999	5.46879	10.8521	8.90532	22.6495	5.90666	7.17297	6.46255	7.57276	7.76906	5.82664	4.62929	10.3897	12.1532	5.73147
NR_046422	IDNK	2.97933	4.04111	3.31268	3.42352	3.47773	5.56315	4.71025	2.2097	4.37093	4.6568	4.95004	6.70848	2.51352	3.32392	3.14792	2.62924	1.9749	4.41605
NM_001168390	C10orf105	0.070102	0.173811	0.131195	0	0	0.195886	0.0735977	0	0.354399	0	0.0343752	0.246938	0	0	0	0.0848141	0	0.0939584
NM_001198906	YY1AP1	33.7191	33.111	37.8498	40.6638	30.9279	40.2349	40.5155	29.831	34.5736	31.9592	43.4847	32.6781	38.693	38.8313	32.7291	32.8231	29.2437	37.9592
NR_039774	MIR3978	0.070102	0	0.163994	0.0760783	0	0.0391771	0.183994	0.552426	0.118133	0.112664	0.0343752	0.0411563	0	0.039105	0.138879	0.212035	0.151915	0.187917
NM_001206992	NR1H4	5.08239	5.17088	6.16618	5.89607	1.6194	0.0783543	1.95034	3.31456	1.89013	0.751097	0.790631	0.288094	1.75185	3.01108	0.185172	2.88368	0.607662	0.187917
NM_024417	FDXR	5.50301	6.12684	5.5758	4.75489	5.12367	3.40841	2.53912	2.2097	2.1264	4.50658	4.12503	2.75747	8.18799	6.53053	1.85172	4.15589	6.68428	1.55031
NR_027397	GORAB	12.0926	14.2525	7.64212	8.82508	10.0881	14.2997	12.9532	9.39124	16.578	15.5477	10.4844	16.1333	9.93983	11.5751	17.221	10.2625	9.57067	13.577
NM_003279	TNNC2	0.420612	0.78215	0.655976	0.494509	0.159285	0.82272	0.993569	2.76213	0.472533	1.27686	1.27188	0.864283	0.761673	0.46926	0.925859	0.636106	1.13937	1.55031
NR_036515	LOC284454	14.1957	14.3394	13.6443	3.84195	7.69879	20.0587	3.82708	12.4296	6.14292	6.19655	3.50628	4.69182	4.22729	6.06127	3.05533	6.23384	7.74769	8.83209
NR_073021	ST3GAL3	0.876275	0.521433	0.754373	0.989017	0.21238	0.430949	0.662379	0.828639	0.315022	0.638432	0.378128	0.452719	0.228502	0.508365	0.370344	0.72092	0.911493	0.140938
NM_001167992	PQBP1	13.074	10.7763	11.5452	10.3847	13.5658	9.87264	9.19971	10.4961	9.25376	14.4586	8.25006	11.6061	13.4435	12.7091	12.7306	13.9519	10.71	11.369
NM_001689	ATP5G3	196.04	201.577	176.523	150.749	171.55	221.664	137.812	47.5086	277.022	168.396	208.864	315.957	178.612	171.906	306.32	148.806	112.19	252.842
NM_001005181	OR56B4	0.105153	0.0869055	0.196793	0	0.0530951	0.235063	0.0367988	0	0	0.0751097	0	0.164625	0	0	0.0462929	0	0.151915	0.0469792
NM_000181	GUSB	37.5396	35.3705	44.6064	25.7525	20.4947	27.9725	24.3976	21.8208	31.4234	34.7007	30.044	35.1063	33.5517	36.3285	33.5624	26.7589	27.2688	25.2748
NR_073609	PDCD6	2.31337	1.91192	2.6895	1.7498	2.62821	1.64544	1.91354	4.14319	3.07146	1.1642	2.02814	2.34591	1.33293	1.6033	2.40723	2.20517	2.50661	2.02011
NM_004821	HAND1	0	0	0	0	0	0	0	0	0	0	0	0	0	0	0	0	0	0
NM_001500	GMDS	100.737	84.4287	67.7295	61.205	66.3423	32.7913	40.1843	40.6033	57.334	41.9863	50.7035	40.1274	71.5211	72.8917	36.0159	40.4987	34.0291	30.9123
NM_001248005	ARNTL2	11.2514	8.6471	8.98687	12.3627	26.9723	3.40841	11.2972	20.716	8.97812	8.82538	9.31569	3.08672	11.3489	13.6476	5.36998	24.0448	26.2054	3.6174
NM_001205301	EGFLAM	0.736071	0.47798	0.524781	0.684704	0.185833	0.352594	0.551983	2.48592	0.275644	0.300439	1.16876	0.617345	0.266586	0.15642	0.601808	0.169628	0.68362	0.234896
NR_028000	RDM1	0.280408	0.173811	0.295189	0.190196	0.530951	0.117531	0.0735977	0.276213	0.393777	0.225329	0.103126	0.164625	0.266586	0.430155	0.370344	0.127221	0.0759577	0.0939584
NR_102404	NBPF8	25.2367	23.5514	28.7974	32.2572	23.8131	37.8843	38.9332	87.2833	25.8712	4.50658	32.8284	32.5958	13.7101	10.6366	18.2857	15.733	20.3567	17.993
NM_013280	FLRT1	0.455663	0.434528	0.688775	0.608626	0.822974	0.744366	0.846373	3.86698	0.354399	1.23931	0.446878	1.39931	0.533171	0.351945	0.740687	1.35703	2.65852	0.469792
NM_001242638	IL31RA	0	0	0.0327988	0	0	0.156709	0	0	0.0787554	0.0751097	0.103126	0	0	0	0	0	0	0
NR_026949	LINC00277	0	0	0.754373	0	0	0	0	0	0.0787554	0	0	0	0	0	0	0	0	0
NM_001013845	CXorf40B	5.78341	6.90899	7.97011	6.96116	6.90236	9.40251	5.85102	4.97183	8.42683	3.98081	5.91254	8.10779	4.1892	4.22334	5.60145	3.56219	3.64597	6.81199
NM_017418	DEC1	0.070102	0.0434528	0.0327988	0.0760783	0	0	0	0	0	0.0375548	0.0687505	0	0	0	0	0	0	0
NM_021120	DLG3	51.2796	51.9695	50.7726	39.7129	69.5545	53.6727	57.259	52.4805	83.4414	48.8213	41.9722	64.5743	53.9265	66.8304	75.0872	48.4713	41.7008	65.536
NM_001256460	CPSF3L	16.0183	15.3388	18.2361	14.3408	14.6277	18.4133	13.9468	36.1839	14.2941	11.98	9.04069	12.2234	11.0443	12.3181	11.7584	10.8138	15.6473	9.20793
NM_018390	PLCXD1	14.5111	15.2954	10.3644	8.97724	6.53069	7.67872	3.97427	13.2582	14.491	0	12.0313	12.2646	2.74202	2.18988	4.72188	4.15589	4.40555	15.5971
NM_001136196	TNPO2	25.0965	28.4616	31.8804	32.5995	61.6168	23.5455	28.2983	37.565	26.1862	29.3679	29.6658	26.6281	27.6487	25.692	22.0817	50.5492	52.4108	27.3419
NM_024719	GRTP1	7.78132	7.25661	10.0692	7.68391	7.24748	14.4955	12.1436	11.0485	11.3014	7.02275	10.1063	16.3802	7.12164	7.97742	11.851	5.89458	4.86129	8.78511
NM_002520	NPM1	70.6277	80.6049	60.6778	88.8975	125.942	24.329	58.1054	23.7543	51.1123	85.5123	81.7787	38.1519	112.537	119.622	40.2286	108.604	111.43	42.4692
NM_007161	LST1	5.53806	2.95479	7.18294	3.6898	1.77868	1.17531	1.58235	2.76213	2.04764	1.46464	2.61252	0.823126	2.89436	1.87704	1.80542	1.1874	2.43065	1.69125
NM_016579	CD320	31.8263	38.1081	26.8294	37.0121	59.7585	12.7326	28.2247	15.1917	32.841	22.5705	28.944	30.1264	36.408	28.312	16.3414	28.1159	27.1929	10.7113
NM_152226	PPEF1	0.035051	0.0869055	0	0.0380391	0.0530951	0	0.0735977	0	0	0	0.0343752	0	0	0.039105	0	0	0	0
NM_001032394	GPR126	21.1357	36.5872	16.1698	71.7038	63.5283	5.01467	9.97249	6.07669	18.035	20.8429	12.0313	9.09554	42.8441	39.8871	7.73092	53.0512	45.8025	9.11397
NM_001134999	FERMT2	5.11744	5.5185	7.01895	4.52666	3.71665	3.09499	3.42229	7.18154	6.85172	3.11705	5.43129	4.48604	4.4177	3.63676	6.38843	3.47738	5.31704	4.18115
NM_031294	LRRC48	0.771122	0.260717	1.01676	0.532548	0.663688	0.901074	1.06717	0.552426	1.26009	0.450658	0.790631	0.658501	0.495087	1.36867	0.78698	1.73869	0.531704	0.845626
NM_001135734	ZNF384	35.2963	31.5032	42.868	43.4407	41.1487	40.9793	34.2965	44.7465	36.1094	34.8509	40.4597	39.4689	41.0161	40.0044	40.0897	50.1251	49.6004	40.8249
NM_001170716	BCAR1	25.412	14.8608	20.3353	20.389	15.3179	34.1233	16.5595	19.0587	29.1789	8.82538	11.2063	21.0309	9.93983	9.22878	17.221	8.09975	7.14003	13.577
NM_003610	RAE1	7.36071	10.6025	7.54373	7.60783	14.9197	6.03328	6.80779	7.45775	6.65483	9.46382	14.0595	6.79079	9.63516	8.32936	5.78662	13.019	8.88705	6.9999
NM_001242922	CT47A12	0	0	0	0	0	0	0	0	0	0	0	0	0	0	0	0	0	0
NM_001142429	MORF4L2	60.6032	65.7875	48.1159	48.6901	77.5453	52.5757	56.4862	30.3834	77.9679	60.3131	67.513	78.6909	63.752	61.9814	68.6987	55.426	42.4604	72.5829
NM_001998	FBLN2	1.29689	1.08632	1.80393	2.47254	0.902616	2.54651	2.42872	0	3.34711	0.976426	2.20002	2.34591	0.875924	0.586575	1.66655	0.424071	0.607662	2.11407
NM_017821	RHBDL2	6.30918	5.73576	7.21574	9.16743	8.20319	30.8324	24.1768	11.3247	27.5644	12.5809	17.2907	31.855	17.6327	17.7146	38.7935	9.24474	3.49406	36.4089
NM_207123	GAB1	48.8611	45.7992	36.1115	45.9893	21.1849	96.65	96.045	81.4828	89.8206	67.1105	86.11	103.879	68.3221	72.0705	111.149	67.3	71.7801	129.381
NM_021177	LSM2	5.46795	6.86554	5.24781	6.20038	6.29177	3.52594	5.26223	3.59077	4.92222	11.6044	6.42817	4.73298	8.30224	8.91594	3.74973	10.2625	8.20344	3.28855
NM_001103167	ZGLP1	0.315459	0.564886	0.55758	0.266274	0.504403	0.626834	0.441586	3.59077	0.118133	0.751097	0.756255	0.411563	0.380837	0.430155	0.277758	0.551292	0.68362	0.281875
NM_170783	ZNRD1	9.42872	8.77746	8.52769	7.22744	10.7783	6.46423	8.79492	4.97183	7.79679	10.5529	10.8626	7.40814	9.40666	11.8097	9.95298	10.3897	11.4696	8.40928
NM_001204830	LIPT1	4.24117	3.82384	4.62463	5.55371	4.59272	5.9941	5.04144	1.38106	2.08702	5.22012	5.46566	4.2391	3.31328	5.82664	3.24051	3.90145	3.4181	3.19459
NM_001040624	NCALD	3.32984	6.3441	2.98469	4.64077	1.96452	4.19195	2.98071	1.38106	4.52844	1.84019	6.11879	2.96325	2.01843	1.87704	2.40723	2.33239	4.10172	5.02678
NR_038224	ZNF503-AS1	2.87418	2.95479	3.11589	1.17921	0.31857	3.33006	6.66059	2.48592	2.67769	6.2341	5.29379	3.95101	1.56143	1.32957	4.02749	7.97253	5.62087	7.18782
NR_037923	DYX1C1-CCPG1	33.684	34.1539	24.8287	37.3544	25.6184	54.1428	41.0307	26.7927	37.4876	42.1741	33.4815	43.7492	42.4633	39.3396	48.0984	27.9463	19.5971	47.402
NR_046218	NEGR1-IT1	0	0	0	0	0	0	0	0	0	0	0	0.0411563	0	0	0	0	0	0
NM_001142864	PIEZO1	46.8982	45.2343	41.6545	38.4956	53.0154	37.8059	50.4144	71.8154	45.1269	32.7103	35.3034	29.5091	36.2556	31.2058	22.591	45.0363	42.8402	27.5768
NM_001242698	LOC100130357	0.70102	0.738697	0.295189	0.342352	0.371665	0.54848	0.257592	2.2097	0.236266	0.563322	0.618754	0.370407	0.190418	0.508365	0.277758	0.381664	0.379789	0.140938
NM_004070	CLCNKA	0	0	0	0	0	1.17531	0.0735977	0	0.315022	0	0.137501	0.205782	0	0.07821	0.0462929	0	0	0.516771
NR_029677	MIR135A1	0.035051	0.0434528	0.0327988	0	0.0265475	0.0391771	0.0367988	0	0	0	0	0.0411563	0	0	0.0462929	0	0.151915	0
NM_020360	PLSCR3	7.92152	7.21316	7.18294	10.3466	5.57498	3.21253	6.77099	7.18154	4.09528	5.25768	5.67192	3.25135	7.00739	7.42995	3.14792	4.74959	4.86129	2.11407
NM_002497	NEK2	5.01229	8.60365	5.01822	5.13528	18.2116	2.11557	2.68632	3.03834	4.52844	8.75027	9.38444	2.9221	6.74081	6.13948	4.12007	9.15993	6.98811	3.10063
NM_001270531	WTAP	10.3751	7.47387	6.85495	9.69998	8.91997	8.61897	9.05251	17.1252	12.4434	18.5145	8.28443	11.6472	13.5959	11.2622	14.6749	19.5921	17.5462	15.6911
NM_005990	STK10	21.276	18.1198	25.9439	26.247	21.477	17.3555	24.9128	14.3631	23.7448	13.5197	13.8532	13.5404	14.2814	13.9214	9.2123	13.231	13.9003	14.7985
NM_001039141	TRIOBP	63.7928	47.8849	55.3972	56.2599	39.1842	49.324	63.0732	72.0916	49.3009	45.892	43.2784	49.758	74.8344	84.0757	47.3114	36.3429	37.2193	51.4422
NM_016235	GPRC5B	7.67617	6.77863	4.13265	6.88508	7.16783	2.54651	5.29903	3.03834	3.30773	2.7415	7.70005	1.72857	3.00861	1.72062	2.08318	1.14499	2.73448	1.45636
NR_037439	MIR3666	0	0	0	0.0380391	0	0.0391771	0.0367988	0	0	0	0.0687505	0	0	0.039105	0	0	0	0
NM_016072	GOLT1B	11.1462	13.0358	7.57652	9.31959	14.2295	13.7512	11.5916	8.28639	12.6009	19.7914	15.572	14.1578	17.3661	14.4688	13.1472	25.3594	19.9769	20.0131
NM_004178	TARBP2	6.62464	6.43101	7.47813	3.72784	6.87581	3.21253	4.93104	7.73396	2.52017	4.20614	4.74378	3.95101	4.53195	4.65349	3.14792	4.792	5.16513	2.02011
NM_001270837	CRIP2	3.29479	2.25954	3.21428	2.66274	2.81404	1.8805	1.80314	6.3529	2.40204	1.9153	1.85626	1.6051	2.3231	1.52509	1.75913	0.508885	1.74703	0.751668
NM_021967	SERF1A	5.85352	8.38638	7.28134	9.89017	9.26509	10.4603	5.51983	2.76213	2.8352	0.187774	6.6688	5.35032	5.5983	5.12275	4.67559	4.41033	3.64597	5.02678
NM_001253701	ERBB2IP	71.9597	68.6988	62.9737	111.188	53.7588	93.0457	72.0153	87.8357	94.034	44.0518	55.6879	102.232	88.2398	83.6456	107.122	118.782	85.9082	141.924
NM_002733	PRKAG1	26.0078	26.5931	26.9606	25.7525	30.742	21.9392	22.9993	21.5446	25.2411	32.8229	31.2471	23.9118	38.6549	41.0602	27.0351	36.8517	36.0799	23.2077
NM_205859	OR2K2	0	0	0	0	0	0	0	0	0	0	0	0	0	0	0	0	0	0
NM_058186	FAM3B	5.71331	8.16912	6.33017	15.9764	0.424761	0.117531	0	0	0.157511	0.0751097	0.825006	0.0411563	0.228502	0.15642	0.0462929	9.45677	2.73448	0
NM_144697	C1orf51	1.75255	0.304169	0.327988	0.646665	1.00881	0.783543	0.404787	0.552426	0.590666	0.187774	0.240627	0.905439	0.342753	1.17315	0.648101	1.06018	0.759577	0.751668
NR_073560	STXBP2	23.6945	17.9894	22.3032	21.8345	20.8929	31.7335	18.3258	25.4116	28.667	13.8202	15.3657	26.9574	17.4423	19.357	24.6741	17.9382	14.356	25.7446
NM_001335	CTSW	1.08658	0.521433	1.80393	2.51058	0.849521	1.41038	1.76634	0.552426	2.67769	1.53975	2.40627	3.70407	1.98035	1.36867	3.33309	0.339256	0.227873	0.187917
NM_001145639	GPSM1	0.315459	0.260717	0.459183	0.570587	0.265475	0.979429	0.33119	2.2097	0.630044	0.300439	0.412503	0.576188	0.190418	0.117315	0.833273	0.169628	0.303831	0.281875
NM_001167733	VARS2	4.06591	4.60599	5.21501	1.90196	2.7344	4.70126	3.42229	9.66745	2.55955	4.6568	2.85315	3.04557	3.65603	2.77645	2.03689	3.22294	4.40555	2.16104
NM_001197108	SCHIP1	0.140204	0.217264	0.360787	0.41843	0.10619	0.352594	0.588781	0	1.02382	0.300439	0.378128	0.740814	0.41892	0.508365	0.370344	0.169628	0.303831	0.375834
NM_001080950	MYO1C	129.128	103.113	131.884	120.66	101.836	152.086	131.077	89.7692	129.868	95.9526	98.5538	142.936	119.964	116.885	113.927	86.9345	75.2741	135.018
NM_016483	PHF7	2.24326	1.47739	2.55831	2.32039	2.36273	3.95689	2.75991	2.2097	3.70151	1.84019	2.44064	3.21019	2.62777	2.07256	3.14792	0.848141	0.379789	2.4899
NM_001114980	TP63	0.630918	0.695244	0.754373	0.494509	0.371665	0.0783543	0.33119	0.828639	2.75644	0.563322	0.481253	0.0823126	0.609338	0.430155	0.277758	0.212035	1.13937	0.281875
NM_001271620	ZNF423	4.94219	3.69348	3.57507	4.1843	1.69904	8.30555	3.2383	0.828639	4.01653	4.13103	4.57191	10.9476	1.48526	1.36867	7.59204	12.9766	11.3937	11.7918
NM_001205293	CACNA1E	0	0	0.426385	0.45647	0	0.509303	1.21436	0.552426	0.590666	0.300439	0.206251	0.288094	0	0	0.185172	0.0848141	0.0759577	0.234896
NM_080861	SPSB3	15.4224	11.9061	14.1691	17.7643	6.10593	19.8236	15.4923	27.8975	11.4195	9.53893	11.2407	10.001	9.90175	11.6142	7.68463	9.15993	8.12748	8.17438
NM_001193612	TUBD1	2.03296	3.08515	1.80393	2.01607	5.57498	2.89911	2.64952	3.59077	2.04764	2.70395	3.36877	1.81088	2.47544	3.98871	1.52767	2.79887	4.17768	2.63084
NM_001185181	PFDN6	2.27831	2.34645	1.67274	3.04313	2.94678	1.91968	2.09753	3.03834	2.32329	2.36595	1.13438	3.04557	2.47544	3.98871	2.87016	3.39256	2.05086	2.4899
NM_016068	FIS1	18.4368	16.2513	20.0073	17.3078	14.787	18.0607	19.0618	12.982	25.2411	22.2325	20.6939	18.9731	17.1376	17.4017	16.0637	18.4471	16.5588	13.8589
NR_033964	LOC441025	0	0	0	0	0	0	0	0	0	0	0	0	0	0	0	0	0	0
NR_038898	DSCAM-AS1	0	0	0	0	0	0	0	0	0	0	0	0	0	0	0	0	0	0
NM_212476	FN1	20.8904	21.4222	18.8593	24.3831	102.739	78.5893	55.971	32.8693	95.1366	29.9688	106.941	124.416	38.0456	25.9657	164.155	12.8493	14.2801	149.347
NM_000742	CHRNA2	0	0	0	0	0.0530951	0	0	0	0	0.0751097	0	0	0	0	0.0925859	0	0	0.0939584
NR_037175	LOC100507463	19.9791	20.1186	24.1727	17.5741	23.6273	17.8648	8.46373	7.18154	12.4827	6.75987	12.2032	12.3057	7.73098	8.99415	12.638	4.57996	6.45641	7.51668
NM_002223	ITPR2	54.2589	50.3617	39.3258	36.1372	43.2725	60.8813	86.6981	193.349	54.9713	69.6267	66.2755	57.0426	77.386	90.1761	64.949	84.6445	136.8	75.6365
NM_001025389	AMPD3	10.2699	9.29889	11.0204	10.0804	6.95545	10.617	9.86209	10.4961	10.1595	9.35115	10.0376	8.23126	7.35014	8.13384	6.5736	5.72495	7.21598	9.9596
NM_001145191	FAM200B	6.72979	8.03876	4.59183	8.78704	4.59272	9.75511	11.886	9.11503	5.78852	12.0175	10.7938	11.5238	12.4914	10.441	10.0919	12.086	7.82365	12.5904
NM_006973	ZNF32	10.3751	12.7751	9.97084	7.07528	6.4245	6.58176	9.6781	2.2097	5.31599	8.1494	8.25006	4.52719	11.0443	12.1225	3.70344	4.07108	2.96235	3.42948
NM_199329	SLC43A3	14.1606	8.77746	14.3331	14.8353	6.07939	6.03328	3.67988	0.552426	8.50559	4.20614	8.83444	5.22685	6.32189	5.35738	5.46257	4.62237	4.55746	6.15428
NM_001080145	CT47A2	0	0	0	0	0	0	0	0	0	0	0	0	0	0	0	0	0	0
NM_173176	PTK2B	30.4593	25.1157	42.9336	39.4846	21.3442	53.8686	35.4741	31.7645	65.0914	22.1198	27.6377	49.1818	24.9067	22.0943	54.8571	31.042	26.7371	49.4221
NR_049718	COX10-AS1	3.99581	3.60658	4.03425	2.58666	2.30964	2.58569	6.62379	2.48592	2.87457	2.85417	3.36877	4.28026	3.04669	3.05019	3.61085	4.28311	3.57001	3.10063
NM_194323	OTOF	0.035051	0	0.196793	0	0	0	0.0367988	0	0	0.0375548	0.0687505	0	0	0	0	0.0848141	0	0
NM_152683	CCDC111	1.99791	2.95479	1.83673	2.47254	2.36273	4.81879	3.75348	4.41941	3.50462	5.37034	4.46878	5.30916	4.22729	5.04454	5.50886	3.56219	3.64597	4.7449
NM_144980	C6orf118	0	0	0	0	0	0	0	0	0	0	0	0	0	0	0	0	0	0
NM_001048226	DBNDD2	22.4677	25.6806	25.9111	29.6705	30.0518	62.9185	34.5173	19.8873	48.6315	22.5705	40.9409	55.6022	23.231	21.586	45.3671	27.0981	30.8388	41.1068
NM_004701	CCNB2	9.35861	13.2531	11.3484	11.9823	26.8661	4.42702	6.4766	9.11503	8.22994	14.8717	18.1845	7.94317	17.1376	14.8208	13.425	18.4895	14.8118	9.77168
NM_001077691	ALG9	12.4782	13.1227	10.43	13.0474	13.1676	9.48087	14.9035	9.94367	11.4195	15.6979	14.1282	13.952	12.6819	15.9939	10.6011	14.376	10.862	9.77168
NM_001261406	MPDZ	3.7154	3.34586	5.28061	3.19529	2.62821	3.40841	3.38549	9.39124	3.11084	2.70395	2.9219	5.06223	3.54178	2.73735	5.41627	2.50202	3.26618	4.51001
NR_002569	SCARNA9	0.525765	0.260717	0.688775	0.798822	0.477856	0.509303	0.772776	7.18154	0.590666	4.01837	0.412503	0.493876	1.98035	0.62568	1.01844	1.86591	3.87384	0.798647
NM_001505	GPER	2.20821	2.17264	1.83673	9.05331	3.53082	7.05189	7.13898	4.97183	6.93048	5.4079	3.50628	6.8731	1.44718	1.5642	5.69403	1.2298	0.151915	6.06032
NM_013376	SERTAD1	12.9689	8.6471	9.90524	7.91214	13.0083	17.5514	5.66702	6.90532	8.82061	2.59128	3.43752	7.65507	2.85627	4.92723	6.01808	3.77423	3.11427	7.14084
NM_005298	GPR25	0.630918	0.260717	0.688775	0.836861	0.637141	0.0783543	0	0.552426	0.118133	0.0751097	0.412503	0.0411563	0.0761673	0.039105	0	0.381664	0	0
NM_016476	ANAPC11	46.9333	29.2003	42.4745	47.5489	47.5466	28.1292	32.3462	18.7825	40.5197	41.7234	36.8846	37.4522	40.4068	36.7978	40.1823	32.7383	31.1427	31.758
NM_003825	SNAP23	36.5582	35.0664	27.7478	39.1423	28.5121	39.804	34.5541	18.2301	45.9538	35.3766	39.0847	52.6801	41.5493	38.1274	45.7837	34.5193	30.9908	45.147
NM_181673	OGT	62.8114	69.2637	80.4883	67.7097	58.9355	78.8244	86.1461	150.26	60.0116	103.802	87.4506	67.4552	69.4265	73.2045	75.9667	99.4022	106.037	78.4083
NM_033641	COL4A6	1.33194	2.47681	1.60714	0.684704	0.876069	2.15474	1.39836	3.59077	0.433155	0.638432	0.996882	0.905439	1.52335	0.86031	1.89801	0.424071	1.51915	0.845626
NM_015277	NEDD4L	70.2422	77.2155	60.2186	61.7375	44.0424	223.466	139.32	93.0838	175.034	95.0513	105.807	164.09	108.653	106.131	185.959	102.964	90.4657	228.883
NM_001242327	USP17L24	0.490714	2.78098	1.77114	1.21725	1.64595	0.861897	0.588781	0	0.551288	0	3.23127	0.32925	0.0380837	0.07821	0.138879	0.127221	0.0759577	0
NM_001130859	PPIP5K1	17.6306	17.1204	18.7281	15.1776	11.7606	19.471	16.7435	34.8028	18.5863	10.3651	14.9189	21.9363	13.7101	14.9772	19.7208	18.0654	18.9135	17.1004
NM_014167	CCDC59	9.56892	9.55961	7.34693	11.8682	18.8753	5.95493	9.6045	8.01018	7.04861	17.0123	9.83132	6.25576	17.5185	16.8151	9.58264	22.5606	18.3818	9.63074
NM_176806	MOCS2	12.8637	14.6436	8.1997	13.7321	11.2562	10.5387	12.8796	10.2199	11.8527	14.2333	13.6126	14.1578	18.0897	15.9157	12.8231	16.3267	14.9637	15.0803
NM_001008744	TDP1	8.69265	9.77687	10.3316	10.689	16.7515	5.32809	10.8189	6.3529	8.26932	12.1678	11.7563	7.12004	12.1487	9.85446	8.70307	14.3336	11.6215	7.2348
NM_001029874	REP15	9.11326	12.7751	5.5758	8.90116	5.68117	30.7149	39.0068	42.2606	28.9032	22.6831	35.9565	25.6404	27.8011	28.4293	27.6832	29.2609	34.6367	32.7915
NM_003532	HIST1H3E	1.12163	1.04287	1.34475	1.59764	1.35392	2.85993	1.87674	1.10485	2.00826	0.826206	1.95939	3.25135	0.571255	1.29046	0.694394	0.805734	0.455746	1.26844
NM_144705	TEKT4	0	0	0	0.0380391	0	0	0	0	0	0	0	0	0.0380837	0	0.0925859	0.0424071	0	0
NM_175040	ST6GALNAC4	5.32775	2.82443	8.3637	12.3627	13.7782	14.6914	8.42693	2.76213	30.754	5.14501	12.0657	21.6482	6.47422	7.39084	15.1841	3.18053	6.38045	11.7918
NM_001163437	TBCK	18.0863	19.5103	15.6778	25.7145	14.0171	18.2174	19.6138	35.6315	12.8765	33.9496	22.3439	17.121	36.9792	37.5799	23.702	24.3841	21.572	18.4628
NM_001025089	CELF4	0.035051	0.130358	0.131195	0.0760783	0.0796426	0.156709	0	0.276213	0.236266	0.525768	0.0687505	0.0411563	0.0761673	0.07821	0.231465	0.169628	0	0.140938
NR_024273	SEC13	40.6241	39.8027	42.2777	34.7678	44.1751	40.6659	34.7749	20.1635	59.6179	41.1225	39.8065	52.6801	31.876	31.0103	45.6911	26.9285	18.4577	36.4089
NM_001081563	DMPK	9.18336	6.03993	7.87171	8.40665	8.6014	4.66208	5.48303	15.1917	2.59893	3.30482	4.50316	3.86869	5.56021	4.7317	3.98119	7.93012	10.862	4.41605
NM_205840	LST1	5.2927	2.95479	6.85495	3.61372	1.67249	1.13614	1.50875	2.48592	1.85075	1.38953	2.44064	0.823126	2.78011	1.83793	1.80542	1.14499	2.43065	1.59729
NM_006809	TOMM34	26.3583	18.9889	31.1917	22.2529	29.2819	12.2233	17.553	12.1534	14.2941	15.8106	20.4876	14.2401	24.0689	23.6976	11.5732	29.2185	26.2054	12.1676
NM_015686	FAM155B	0.911326	0.0869055	0.327988	0.45647	0.132738	0.54848	0	0	0.315022	0.150219	0.928132	0.905439	2.01843	1.79883	0.648101	0.169628	0	0.422813
NM_022051	EGLN1	39.5726	44.0611	31.0933	44.8101	36.1577	64.3289	37.0564	20.9922	51.191	46.4929	40.9753	74.6987	43.9866	43.5239	61.4307	45.6724	32.358	72.6769
NR_028036	FAS	12.4782	11.8626	9.61005	10.0804	8.097	28.0508	20.313	11.0485	22.209	13.9704	16.2939	26.7104	13.8624	10.8712	28.7016	12.8493	15.8752	27.9526
NM_001202407	ZNF559	3.08449	2.52026	3.83746	2.20627	1.27428	3.99607	2.90711	4.69562	2.24453	7.73629	4.74378	3.95101	3.04669	3.1284	1.38879	1.44184	0.68362	4.22813
NR_045768	ATF2	33.9644	35.7182	31.5197	43.5928	23.999	30.8716	31.7574	31.2121	29.6514	53.8536	33.7565	32.3489	50.0038	52.2834	47.2188	57.3768	48.7649	49.4221
NM_018951	HOXA10	21.9069	21.8133	20.5649	10.1184	20.9991	15.1224	15.1243	16.0204	10.9076	11.642	24.6127	18.6438	34.3515	30.5019	19.5819	15.2665	22.0277	17.0065
NM_001002838	WNK3	0.35051	0.260717	0.295189	0.228235	0.185833	0.195886	0.478385	1.10485	0.630044	0.225329	0.446878	0.370407	0.228502	0.273735	0.555515	0.508885	0.379789	0.234896
NM_016233	PADI3	0	0	0	0.0760783	6.4776	0	0	0.276213	0	0.0751097	0	0	0.0761673	0	0	0.0848141	0.151915	0
NM_007171	POMT1	7.0102	5.73576	7.37973	6.50469	10.8314	12.8501	8.46373	10.7723	8.19057	6.75987	7.97506	10.2068	7.9214	7.27353	7.12911	7.12439	9.72259	6.71803
NM_001145160	TPM4	189.836	216.004	214.701	283.81	403.576	140.607	202.136	156.337	272.494	190.854	239.217	222.244	258.664	270.607	233.502	246.003	213.365	223.339
NM_175735	LYG2	0.245357	0.130358	0.196793	0.114117	0.10619	0.0783543	0.0735977	0.276213	0.157511	0.225329	0.240627	0.288094	0.228502	0.273735	0.138879	0.339256	0.303831	0.140938
NM_004580	RAB27A	25.7625	26.8104	25.6815	24.4592	18.132	75.2593	42.2083	23.7543	68.596	20.2421	33.0346	58.2773	26.849	23.1502	71.1523	28.7944	18.1539	104.482
NM_003057	SLC22A1	0.140204	0.130358	0.0655976	0.190196	0	0.235063	0.0735977	0.552426	0	0.0751097	0.0343752	0	0	0.039105	0.0925859	0.551292	0.531704	0.328855
NM_001252675	ACSS1	19.5585	18.9889	23.3528	12.9333	14.7604	19.8236	22.3737	21.5446	16.3811	15.5477	26.1596	14.6928	16.0332	16.1504	12.8231	21.6276	18.6096	14.5636
NR_027685	RPAIN	25.7625	32.0247	23.3528	18.2207	28.3528	15.0832	19.3562	11.3247	16.6174	29.105	29.3221	22.1009	28.5247	28.0774	19.4893	23.3663	23.5469	15.3622
NM_018087	TMEM48	28.7769	35.2402	29.4533	31.4584	62.546	16.5328	23.4041	17.1252	31.1084	47.5444	34.994	27.5747	48.8613	40.1608	34.3494	52.3303	47.0178	30.3016
NM_016252	BIRC6	119.384	120.972	111.155	137.93	118.667	150.088	150.986	333.113	125.261	164.528	137.226	180.841	140.186	143.124	169.34	160.256	193.92	208.823
NM_001012415	SOHLH1	0	0	0	0	0	0	0	0	0	0	0	0	0	0	0	0	0	0
NM_000495	COL4A5	7.95657	11.5584	5.18221	1.52157	0.955711	2.62487	1.36156	7.18154	0.669421	0.751097	1.44376	2.14013	1.94227	1.95525	2.6387	2.84127	4.48151	1.40938
NM_015474	SAMHD1	30.214	26.1151	30.3061	33.5125	74.2535	17.5122	15.3819	15.4679	14.806	18.6272	17.6689	16.5037	27.4964	21.3122	31.6181	23.8328	27.6486	24.7581
NM_080831	DEFB129	0	0	0	0	0	0	0	0	0	0	0	0	0	0	0	0	0	0
NM_001164721	PTAFR	19.909	13.6876	16.8914	18.3729	10.3801	6.42505	4.30546	5.80047	11.1439	5.29523	4.64066	4.93876	7.50248	11.1058	6.43472	4.32552	8.05152	3.71136
NR_049885	MIR5700	0	0	0	0	0	0	0	0	0	0	0	0	0	0	0	0	0	0
NR_023386	CROCCP3	0.280408	0.912508	0.688775	0.570587	0.769879	0.901074	1.69275	4.97183	1.0632	0.826206	0.962507	0.411563	0.457004	0.70389	0.833273	1.39943	1.51915	1.08052
NM_001244015	PIANP	0.105153	0.173811	0.26239	0.380391	0.185833	0.509303	0.441586	0.828639	0.275644	0.300439	0.0687505	0.370407	0.228502	0.15642	0.509222	0.339256	0.303831	0.281875
NM_001145272	ADAMDEC1	54.294	32.155	59.7922	57.8575	22.061	30.4406	66.2747	27.3451	43.6305	52.2012	34.719	55.2729	66.8368	24.9099	139.481	23.1967	21.8758	68.4957
NR_030174	MIR494	0	0	0	0	0	0	0	0	0	0	0	0	0	0	0	0	0	0
NR_039732	MIR4509-1	0	0	0	0	0	0	0	0	0	0	0	0	0	0	0	0	0	0
NM_001356	DDX3X	147.67	155.431	120.437	132.072	195.284	155.925	125.889	73.7489	159.992	132.493	113.335	137.874	136.073	155.951	185.264	110.301	92.2127	165.931
NM_002163	IRF8	14.8616	10.8632	13.9395	33.7407	21.5831	19.8628	33.8917	19.0587	30.7146	20.8429	26.0221	20.0843	14.0529	15.642	20.0448	18.4895	27.1169	22.503
NM_198398	ERGIC3	167.474	129.62	159.074	108.982	99.0754	111.146	135.383	42.5368	141.327	150.67	166.445	136.392	182.116	216.994	166.006	228.489	211.162	156.441
NM_198382	CACNA1G	0.140204	0.0869055	0.0983964	0	0	0	0	0	0	0	0.0343752	0	0	0	0.138879	0.0848141	0	0.0469792
NM_031882	PCDHAC1	0.070102	0	0.131195	0.266274	0.0530951	0.235063	0.0735977	0	0.590666	0	0.0687505	0.0823126	0.342753	1.32957	0.0925859	0.0848141	0.303831	0.0939584
NM_181623	KRTAP15-1	0	0	0	0	0	0	0	0	0	0	0	0	0	0	0	0	0	0
NM_145918	CTSL1	22.6429	15.5561	19.7449	15.8623	26.813	18.6875	13.91	4.41941	13.9397	15.1722	17.3595	12.0176	17.0615	14.7426	17.8228	7.76049	4.17768	17.3823
NM_080599	UPF2	23.5192	27.3752	20.3025	28.6815	34.6976	26.9539	35.0693	25.4116	25.5955	47.1313	34.3752	26.4635	34.7704	36.3676	36.0622	47.7079	36.6116	35.6103
NR_024490	GABPB1-AS1	5.3628	5.82267	7.28134	4.41254	4.40689	4.15278	6.4766	8.83882	5.00097	5.67078	5.36254	2.59285	4.79854	5.94396	3.61085	5.25848	5.9247	2.91271
NM_020987	ANK3	38.5561	42.323	22.4344	43.8591	22.1937	69.3044	48.4641	63.529	42.5279	49.7601	30.5596	42.1852	48.0997	49.7024	69.9486	50.8461	35.6242	64.6434
NM_005176	ATP5G2	33.5438	33.1979	32.6348	32.4093	18.1054	28.6777	31.095	30.3834	22.8391	34.1373	33.0346	27.4513	34.8085	37.0715	28.4702	42.7463	41.8527	22.0802
NR_036640	YIPF1	11.9874	11.7322	12.6931	13.7321	10.911	17.6297	12.0332	7.73396	15.7117	9.61404	12.6501	15.4336	14.586	13.9214	16.5266	9.41437	9.11493	15.738
NM_001251934	NR1H3	8.7277	7.64768	7.74052	9.39567	3.90249	6.89518	8.75812	16.849	5.39475	10.7782	6.46255	7.65507	8.22607	8.99415	7.49946	5.34329	4.48151	5.07376
NR_033426	ACAD9	13.6699	13.8614	11.4796	8.63488	11.15	9.04992	12.9164	8.01018	12.719	13.5573	13.5782	10.3302	12.8342	9.69804	13.7953	15.9451	14.1281	11.6039
NM_004557	NOTCH4	2.52367	1.69466	3.44387	2.13019	2.38928	0.940251	1.72955	5.80047	1.96889	1.27686	1.71876	1.07006	1.98035	1.09494	0.925859	1.14499	1.82299	0.892605
NR_029970	MIR451A	0	0	0	0	0	0	0	0	0	0	0	0	0	0	0	0	0	0
NM_198696	KRTAP10-3	0	0	0	0	0	0	0	0	0.0393777	0	0	0	0	0	0	0	0	0
NM_018397	CHDH	10.5503	12.4275	7.47813	8.97724	10.6721	13.1243	16.4491	13.8106	14.2941	9.91447	12.0313	9.7952	14.4337	13.9996	7.91609	13.9095	8.65918	7.32876
NM_001161728	PLA2G2A	771.367	1077.06	200.204	123.741	382.125	716.08	62.4108	4.69562	827.247	15.9984	42.3847	268.092	21.6315	8.13384	496.446	40.7108	29.4716	365.451
NM_001204857	TCEB1	8.44729	9.16853	7.24854	8.29253	12.265	6.77765	5.77742	3.86698	7.52114	8.44984	9.59069	7.07889	8.72116	6.2568	6.71248	11.0258	11.3937	7.32876
NR_024484	LOC400657	3.435	4.12801	3.27988	4.41254	3.45118	4.70126	5.29903	3.86698	3.22897	6.72231	3.6094	3.33366	6.35997	4.7317	5.41627	4.41033	3.87384	3.75834
NM_006646	WASF3	0.736071	0.434528	0.426385	1.14117	0.849521	5.40645	1.58235	0.276213	1.14195	1.12664	0.550004	3.41597	0.685506	0.821205	5.64774	0.254442	0.227873	3.75834
NM_002267	KPNA3	22.2223	27.0276	29.4861	28.8337	36.9011	25.9353	25.9432	14.3631	29.9271	29.3679	30.3533	32.5546	36.408	32.2616	40.4137	38.0391	30.6869	38.8518
NM_001195396	ARL4A	8.7978	7.8215	8.88848	12.5149	11.6544	14.8873	8.20614	8.83882	18.5469	10.0647	8.00943	9.26017	10.0922	10.2846	11.7584	15.3089	10.4822	9.58376
NM_001012507	CENPW	2.94428	3.82384	3.54227	2.8149	8.89342	0.979429	1.76634	1.10485	5.23724	3.9057	3.6094	2.71632	4.4177	2.65914	3.2868	3.51979	3.11427	2.06709
NM_032319	PRADC1	3.99581	4.34528	6.33017	3.95607	3.7432	10.2644	4.59986	3.31456	7.56052	2.92928	4.67503	9.63058	3.54178	3.24571	5.41627	2.79887	1.4432	5.40261
NR_073078	CNIH2	0	0	0.0655976	0.0380391	0	0.117531	0	0	0	0.0375548	0	0.0411563	0	0.07821	0.138879	0.169628	0	0.0939584
NM_199353	PRB1	0.035051	0	0.0327988	0	0	0.0783543	0.110397	1.65728	0	0.0375548	0.137501	0	0.152335	0.039105	0	0.0424071	0.303831	0
NM_022131	CLSTN2	0.806173	0.564886	0.426385	0.989017	0.159285	0.861897	0.404787	0.552426	0.236266	0.337993	0.687505	0.823126	0.380837	0.195525	0.694394	0.0424071	0.68362	1.08052
NR_038393	LOC100506178	0.035051	0.0869055	0	0	0.0796426	0.0391771	0	0	0.354399	0	0	0.288094	0	0.07821	0.324051	0.0424071	0.151915	0.375834
NM_080823	SRMS	0.806173	0.304169	0.55758	0.684704	0.557498	0.705189	0.993569	1.38106	0.748177	0.337993	0.515629	0.0411563	0.723589	0.86031	0.0462929	0.339256	0.759577	0.0469792
NM_201649	SLC6A9	7.46586	7.9084	8.56049	8.63488	12.3446	8.14885	5.66702	9.39124	16.263	5.29523	7.94068	17.0387	6.43614	5.59201	18.4709	10.8986	11.9254	19.0266
NM_181296	CMTM1	1.43709	0.78215	1.60714	1.29333	1.27428	0.979429	1.17756	0	0.708799	0.863761	0.893756	0.411563	0.83784	0.586575	1.2962	0.975362	1.06341	0.563751
NM_198516	GALNT18	1.08658	1.26013	1.27915	1.59764	9.21199	1.33202	1.28796	0.828639	4.09528	1.5773	1.37501	2.30475	0.41892	0.664785	1.2962	0.0848141	0.303831	1.1275
NM_005459	GUCA1C	0	0	0	0	0	0	0	0	0	0	0	0	0	0	0	0	0	0
NM_025164	SIK3	24.781	23.3341	30.3061	24.5352	22.9371	31.5376	23.6617	28.7261	22.4847	23.3591	20.3158	23.5003	21.2126	20.0609	21.4799	19.5497	23.7748	25.1809
NM_001258291	PRSS36	0.736071	0.564886	0.360787	0.41843	0.265475	1.72379	0.147195	0.276213	1.0632	0.150219	0.240627	0.905439	0.342753	0.351945	0.833273	0.212035	0.227873	1.08052
NR_003602	LOC541473	0.070102	0.0434528	0.360787	0.266274	0.292023	0.391771	0.220793	1.10485	0.354399	0.150219	0.309377	0.288094	0.152335	0.23463	0.231465	0.551292	1.82299	0.0469792
NM_016657	KDELR3	12.373	13.4704	15.5138	20.5411	22.8309	15.0048	15.2347	4.14319	25.2411	9.16338	12.4095	17.6149	13.9386	15.9939	10.2307	5.04644	4.02576	9.53678
NM_012470	TNPO3	31.1253	27.4187	39.2274	30.4313	39.3169	28.4818	28.5191	35.6315	28.5488	34.3627	31.2471	29.6325	38.7311	33.904	36.7103	55.8077	49.0687	30.8184
NM_004849	ATG5	23.4842	26.6365	21.7784	22.7854	26.8661	31.3417	28.7399	18.2301	28.5882	30.457	25.3346	32.2254	27.6868	29.0941	33.7013	28.8368	24.4584	41.0129
NM_001204506	DGKH	7.53596	7.12625	8.3965	6.54273	8.73414	12.1057	15.2347	38.6698	8.50559	13.1066	8.66256	8.02548	9.97792	10.2064	10.4622	11.9164	16.103	15.2213
NM_181485	ZGPAT	5.32775	4.08456	5.28061	3.65176	5.73427	7.32613	5.74062	7.73396	6.45795	2.51617	4.84691	5.67957	3.23711	2.50272	5.41627	3.09572	2.05086	3.33552
NR_003592	TTTY7B	0.070102	0.173811	0.26239	0	0	0	0.220793	0.552426	0.157511	0	0.206251	0	0	0	0	0.212035	0	0.140938
NM_001129842	CACNA1C	5.3628	5.5185	10.758	5.70587	5.01748	2.78158	2.75991	11.3247	2.95333	6.08388	10.6907	2.9221	2.93244	4.53618	3.37938	12.9342	17.3943	3.71136
NR_024228	SNAR-A8	0	0	0	0	0	0	0	0	0	0	0	0	0	0	0	0	0	0
NM_001202517	CFLAR	66.5268	57.0969	59.7594	62.7265	41.7327	82.7813	70.1386	74.3013	100.728	65.2327	54.0035	75.4807	55.564	62.568	88.975	60.006	59.4749	90.5759
NR_046563	EFCAB6-AS1	0	0	0	0	0	0	0	0	0	0	0	0	0	0.07821	0	0	0	0
NR_036539	LOC644656	1.15668	1.12977	0.81997	0.608626	0.690236	0.509303	0.95677	1.10485	0.669421	1.65241	1.10001	1.07006	0.952091	0.7821	0.648101	1.2298	0.835535	0.751668
NM_003488	AKAP1	104.557	101.201	86.6217	86.539	109.721	104.799	129.79	132.858	98.0899	108.646	106.288	105.895	88.8492	103.433	85.2716	97.9179	106.493	101.193
NM_014803	ZNF518A	40.4488	48.8409	35.5867	43.3266	43.1663	52.3407	70.7642	74.3013	37.1726	79.2407	57.9223	49.6345	42.1586	51.5795	48.191	71.3711	79.3758	74.9788
NM_001037671	C12orf74	1.01648	1.17322	0.491982	1.59764	0.690236	0.352594	0.404787	0.828639	0.708799	0.0375548	0.584379	0.288094	0.190418	1.01673	0.0925859	0.932955	0.455746	0.140938
NM_022843	PCDH20	11.9874	11.7322	22.8608	20.1988	16.0082	23.1929	0.404787	2.2097	7.48177	0.225329	1.34063	0.905439	3.35136	3.44124	7.96239	14.588	12.9128	26.6372
NR_030306	MIR580	0	0	0	0	0	0	0	0	0.0393777	0.0751097	0	0	0.0380837	0.039105	0	0	0.0759577	0
NM_032283	ZDHHC18	10.6555	8.03876	11.3484	8.749	12.3977	12.4583	7.10218	9.94367	8.15119	2.89172	4.81253	7.65507	5.94105	6.02217	6.85136	6.99717	8.20344	6.24824
NR_037658	BLOC1S1-RDH5	20.5749	16.1644	21.0896	25.6764	15.2383	39.0204	18.841	15.4679	31.1872	18.6647	17.7376	34.3655	24.145	20.4128	32.3125	18.235	15.5713	27.2479
NM_000544	TAP2	29.9335	30.5907	33.3236	26.5513	38.9452	22.2526	11.7756	17.6776	25.2411	11.8673	15.7782	20.3724	9.67325	9.73714	20.0911	9.54159	20.0528	19.6843
NM_003778	B4GALT4	26.1831	30.5038	26.6326	22.1007	13.8578	50.6169	34.2965	34.8028	46.8201	26.2884	36.1971	39.0985	24.4116	28.9377	46.8022	24.9778	27.5727	40.1672
NM_032717	AGPAT9	5.74836	5.82267	4.82142	4.33646	4.38034	9.01074	5.74062	3.59077	23.2329	3.71793	4.53753	16.0921	2.66586	2.77645	20.0448	4.15589	2.50661	19.5434
NR_038464	LINC00857	1.7175	1.86847	1.73834	0.494509	2.78749	1.48873	1.25116	0.828639	3.42586	1.46464	3.02502	4.36257	1.98035	1.83793	1.75913	1.8235	0.531704	2.06709
NR_037884	LOC100507053	2.97933	4.38873	3.57507	1.48353	0.371665	1.29285	2.68632	2.2097	1.73262	3.75548	3.23127	2.55169	2.01843	1.75972	2.17577	4.24071	5.31704	3.10063
NR_027766	NUDT16P1	18.0863	17.8591	18.9905	21.0737	7.27402	22.1743	19.4298	14.3631	20.0826	15.2848	21.9658	17.8618	19.0799	20.1391	19.119	10.729	13.0647	18.181
NM_018242	SLC47A1	1.29689	0.869055	1.34475	2.13019	1.14154	0.783543	0.478385	0	1.18133	0.225329	0.412503	0.740814	0.457004	0.586575	0.833273	0.296849	0	0.798647
NR_026052	MGC2752	8.55244	8.99472	11.0204	9.54782	12.557	9.40251	6.77099	6.07669	7.00923	5.55811	10.1751	9.4248	10.9681	10.2455	8.28644	9.584	8.20344	8.5972
NM_017773	LAX1	5.39785	3.47622	5.24781	3.3094	1.22119	1.33202	1.25116	0.552426	2.44142	2.3284	2.71564	0.699657	0.875924	0.62568	1.20362	2.12035	1.06341	0.751668
NM_016828	OGG1	7.46586	7.64768	7.80612	7.8741	7.85807	6.46423	9.93569	8.28639	8.89936	8.18695	7.4938	8.27242	8.49265	6.80427	7.2217	7.63327	8.58322	6.53011
NR_046254	FGD5-AS1	55.4156	65.5268	47.4927	52.9505	46.1927	72.8695	63.9932	56.3474	51.5061	58.8109	74.6287	65.9324	55.9068	59.205	66.3378	51.9062	56.9683	61.5428
NM_174897	BPIFB6	0	0	0	0	0	0	0	0	0	0	0	0	0	0	0	0	0	0
NR_002914	SNORD62A	0.140204	0.260717	0.295189	0.304313	0.424761	0.352594	0.220793	1.65728	0.157511	0.375548	0.0343752	0.246938	0.228502	0.117315	0.138879	0.466478	0.531704	0.187917
NR_030581	MIR891A	0	0	0	0	0	0	0	0	0	0	0	0	0	0	0	0	0	0
NM_001174103	SGK494	1.68245	0.825602	2.55831	1.82588	1.64595	2.58569	2.94391	15.1917	2.40204	2.92928	1.16876	2.14013	1.33293	1.09494	1.75913	4.28311	9.41876	3.24157
NR_001275	CELP	0.210306	0.391075	0.26239	0.228235	0.10619	0.470126	0.95677	0.552426	0.472533	0.150219	1.68439	0	0.0380837	0.117315	0.324051	0.636106	0.607662	0
NM_001080137	CT47A10	0	0	0	0	0	0	0	0	0	0	0	0	0	0	0	0	0	0
NM_033204	ZNF101	2.31337	2.303	3.50947	5.62979	5.33605	3.6043	2.75991	3.31456	4.01653	2.92928	3.36877	5.47379	3.16094	3.32392	6.80506	4.57996	5.84875	5.73147
NM_133458	ZFP90	8.62254	11.4281	8.03571	12.8192	6.79617	5.71986	11.15	8.5626	4.92222	13.8202	10.622	6.46154	15.0811	16.8934	7.77721	12.5949	12.4571	6.20126
NR_047526	LOC643837	0.981428	0.869055	0.688775	0.722744	1.03535	1.33202	1.28796	0.552426	1.45698	0.901316	0.756255	1.93435	1.02826	1.13404	1.62025	0.975362	0.911493	1.40938
NM_001178111	SCAMP5	2.83913	2.08573	2.7551	4.5647	1.72559	7.91378	1.21436	1.38106	1.85075	5.03235	5.87817	4.97991	2.28502	1.05583	3.05533	7.16679	7.51982	20.7178
NM_080632	UPF3B	4.24117	4.51909	4.65743	3.57568	7.16783	5.13221	5.70382	8.28639	6.33981	8.52495	5.46566	4.60951	9.02583	6.49143	7.36058	12.1708	10.3303	8.92605
NM_024954	UBTD1	0.525765	0.347622	0.163994	0.266274	1.16809	0.156709	0.294391	0.552426	0.0393777	0.150219	0.206251	0	0.380837	0.39105	0.277758	0.0848141	0.303831	0.0939584
NM_014752	SPCS2	21.5213	30.5038	17.6786	15.4058	27.3705	20.8814	19.393	6.90532	27.6432	7.58608	32.8627	29.3033	15.7285	13.8041	17.545	13.5279	11.5456	15.738
NM_001257230	ALG13	9.77923	9.86378	11.3484	12.8572	10.7783	18.4916	13.6524	54.9664	10.632	19.1154	9.76257	9.46595	16.833	14.7817	10.8788	17.0476	32.358	14.4696
NM_013324	CISH	15.5977	13.9483	17.777	7.49371	8.22974	13.0852	13.0636	10.7723	16.578	8.11184	12.0657	12.7585	7.76906	8.6422	12.4991	6.70032	9.64663	10.4764
NM_182666	UBE2E1	10.8308	9.64651	8.1669	12.0204	10.327	10.7345	12.07	8.28639	10.1988	25.3871	15.1939	11.1534	27.1156	22.9155	15.5544	19.2528	12.7609	23.3957
NM_001135191	ASAP2	27.0243	25.8544	23.32	33.5505	29.9456	42.7423	44.0482	39.2222	47.0958	36.0902	26.3658	42.2675	33.5136	38.2838	55.6904	36.7245	39.1182	54.355
NR_038260	HIVEP3	1.01648	1.60775	1.27915	4.3745	1.30083	3.95689	3.56949	3.86698	3.03208	1.72752	1.71876	3.45713	2.5516	2.07256	3.37938	0.593699	0.227873	2.58386
NM_001271168	PCED1A	13.2843	11.993	13.8083	9.31959	5.65462	8.03131	4.15827	7.45775	5.39475	6.15899	7.28755	3.99216	7.65481	9.93267	4.67559	8.48141	12.9128	3.3825
NM_001080424	KDM6B	61.0238	43.4528	47.4927	36.6697	36.1577	47.6002	38.418	62.7003	30.0452	23.6971	25.2314	25.4346	30.2003	31.3231	30.97	30.2362	35.0165	38.7109
NM_006686	ACTL7B	0	0	0	0	0	0	0	0	0.0787554	0	0	0	0	0	0	0	0	0
NR_030347	MIR548C	0	0	0	0	0	0	0	0	0.0393777	0	0.0343752	0	0	0	0.0462929	0	0	0.0469792
NR_002922	SNORA13	0.035051	0.0434528	0.0983964	0	0.132738	0.0783543	0.147195	0.552426	0.0393777	0.0375548	0.171876	0	0	0.07821	0.138879	0.0848141	0.151915	0.0469792
NM_198949	NUDT1	5.53806	5.47505	7.37973	5.62979	12.6897	2.15474	3.2383	1.38106	4.68595	5.44545	4.33128	4.07447	4.45579	3.40213	4.12007	9.28715	8.12748	2.81875
NM_007293	C4A	38.4509	30.4604	49.1982	35.5666	25.6449	19.1968	26.8264	66.0149	19.807	2.55373	24.8877	9.21901	14.7765	14.4297	6.94394	6.78513	13.9762	2.02011
NR_033399	DDX12P	4.55663	5.99648	6.16618	4.83097	8.33593	5.83739	4.04787	25.964	5.1191	3.0795	4.88128	3.5806	4.03687	2.89377	3.2868	9.37196	13.2926	4.46303
NM_001271816	DCLRE1A	10.4802	11.6453	7.87171	10.9553	16.6188	7.44366	13.0268	4.97183	10.632	13.7075	13.922	11.2768	13.3293	13.5694	12.8231	14.588	11.3937	9.63074
NM_014347	ZNF324	2.45357	1.95537	2.91909	3.08117	4.77856	3.56512	3.71668	3.03834	3.1896	2.55373	2.71564	2.18128	2.01843	3.01108	2.31465	4.02867	5.24108	2.44292
NM_001100176	HOOK2	11.9173	9.03817	8.79008	10.8031	13.5658	13.2811	12.4012	21.2684	10.947	10.0647	6.22192	9.83636	8.34032	8.79862	10.74	12.6373	14.8877	9.77168
NR_003012	SCARNA11	0.070102	0.0869055	0.0655976	0	0	0.195886	0.0735977	0.276213	0.0393777	0	0.0687505	0.123469	0	0.039105	0	0	0	0.0469792
NR_024419	LOC100192426	0.105153	0.0434528	0	0.0380391	0.0265475	0	0.0367988	0	0.157511	0	0.0343752	0.0411563	0	0	0	0	0.151915	0.0469792
NM_013334	GMPPB	9.14831	5.64886	8.92128	4.41254	6.23867	8.14885	7.28617	6.62911	18.4682	4.6568	6.15317	12.2646	4.30345	3.1675	9.35117	2.33239	1.74703	8.5972
NM_001164605	FXYD5	17.0698	13.8614	23.8447	75.3555	55.3516	4.70126	34.1125	20.9922	6.37919	31.0203	11.2751	4.15679	38.3883	36.8369	4.21266	42.195	52.107	4.7449
NM_030613	ZFP2	0.315459	0.304169	0.163994	0.266274	0.530951	0.430949	0.478385	0.276213	0.0787554	0.525768	0.515629	0.493876	0.457004	0.93852	0.138879	0.763327	1.13937	0.563751
NM_001258238	TMEM218	4.20612	4.86671	3.77186	5.4396	5.62808	4.19195	5.99821	3.86698	3.97715	6.60965	4.91566	5.1857	4.91279	5.12275	4.16636	4.53756	3.49406	4.7449
NM_004393	DAG1	193.061	159.95	152.186	143.331	183.815	147.228	149.587	73.1964	158.732	122.466	160.189	149.15	154.315	154.308	102.261	96.9425	109.227	99.6429
NM_017684	VPS13C	134.21	137.485	104.989	108.335	85.2441	79.0203	167.582	332.56	74.6995	207.002	136.504	76.88	177.546	200.843	88.975	169.84	260.079	105.891
NM_005002	NDUFA9	52.2961	50.3617	43.6552	35.6046	48.2103	44.8578	30.0647	30.3834	53.3568	47.3942	47.1628	58.442	50.4608	46.8869	68.2358	61.1086	54.4617	62.4824
NR_046249	GM140	0	0	0	0	0	0	0	0	0	0	0	0	0	0	0	0	0	0
NM_001159651	BOD1	17.0698	15.9472	13.8739	13.1996	24.6892	10.1077	19.9082	14.9155	9.17501	17.5005	17.3251	10.2068	17.2138	19.9044	7.45316	17.1749	17.2424	10.2884
NR_029504	MIR30A	0	0	0	0	0	0	0	0	0	0	0	0	0	0	0	0	0	0
NM_022757	CCDC14	27.4099	33.3717	25.2223	30.5835	21.8486	54.7305	77.02	138.383	40.8741	62.6039	52.5598	47.8236	47.6426	46.6914	66.8933	63.5682	96.3904	64.4555
NM_015199	ANKRD28	25.3769	26.7669	23.9103	22.367	21.2911	21.3907	27.8567	27.8975	22.3272	37.2919	27.4658	25.4758	30.3146	29.7198	29.1646	33.3319	31.3705	29.0801
NM_001242474	ZNF345	1.33194	1.30358	1.08236	0.912939	1.03535	1.17531	0.735977	0	0.748177	3.00439	1.71876	2.42822	1.48526	0.977625	1.06474	1.52665	0.835535	1.55031
NM_133493	CD109	1.29689	1.43394	1.93513	7.83606	49.5112	1.64544	1.36156	2.48592	0.984443	4.2437	1.99376	2.18128	5.67446	3.20661	2.96275	0.890548	1.74703	1.83219
NM_013229	APAF1	27.5501	27.7229	27.4526	33.2082	39.662	37.6884	30.0647	95.8459	39.299	28.8421	27.0189	43.9961	24.2212	32.6136	44.7653	45.0363	50.8917	55.4355
NM_001004746	OR5T2	0	0	0	0	0	0	0	0	0	0	0	0	0	0	0	0	0	0
NR_027444	LOC100133957	0.455663	1.17322	0.852769	1.44549	1.53976	1.13614	1.17756	1.38106	1.45698	1.76508	1.16876	1.72857	1.18059	1.79883	1.9906	1.01777	1.36724	1.55031
NR_029950	MIR20B	0	0	0	0	0	0	0	0	0	0	0	0	0	0	0	0	0	0
NR_027283	LOC440461	0	0	0	0	0.0265475	0	0	0	0	0.0751097	0	0	0	0.07821	0.0925859	0.0848141	0	0
NR_073417	SPINK2	0.35051	0.304169	0.196793	0.266274	0.132738	0.0391771	0.478385	0	0.472533	0.826206	0.962507	1.15238	0.533171	0.117315	0.324051	0.169628	0.227873	0.939584
NR_048543	LARS2-AS1	0.315459	0.173811	0.26239	0.0760783	0.371665	0.27424	0.257592	1.38106	0.157511	0.375548	0.275002	0.164625	0.114251	0.07821	0.416636	0.339256	0.759577	0.0939584
NR_024049	BCAR4	0	0	0	0	0	0	0	0	0	0	0	0	0	0	0	0	0	0
NR_033323	NSUN5P2	8.938	10.6894	19.8105	6.96116	4.45999	10.1077	11.9596	39.4985	8.85999	6.34677	9.07506	9.71289	6.93122	7.15621	7.2217	12.8917	12.1532	7.79855
NM_001145212	SLCO2B1	33.9644	28.983	28.0758	32.2572	20.7071	25.3868	18.5834	9.94367	29.3364	28.6919	23.822	25.1877	20.4128	18.3011	20.4615	17.811	14.7358	18.04
NM_001142544	CTF1	0.140204	0.0869055	0.81997	0.190196	0.10619	0.156709	0.110397	0.552426	0.393777	0.150219	0.0687505	0.740814	0.0761673	0.430155	0.416636	0	0.0759577	0.234896
NM_001237	CCNA2	16.3688	24.1597	17.0226	22.4051	54.8207	5.60233	8.86852	5.80047	18.9801	22.7958	29.9752	13.6639	27.9534	19.9826	17.4061	28.8792	24.3065	9.20793
NM_005646	TARBP1	32.3871	36.9783	32.438	29.6705	35.9188	21.7825	46.2561	67.6722	19.807	47.3566	37.1596	26.5458	41.9682	43.7194	24.2112	62.9745	68.8937	28.6573
NM_007058	CAPN11	0.105153	0.173811	0.0327988	0.190196	0	0	0	0.828639	0.157511	0.187774	0.0343752	0.0411563	0.152335	0.117315	0.0462929	0	0	0
NM_001142798	C17orf49	19.278	16.9031	16.5962	20.0847	18.4771	9.75511	11.9964	10.2199	12.9553	17.9137	15.6064	9.87751	17.1757	19.9826	10.9714	16.2843	17.2424	10.8992
NM_001270407	JAM2	2.17316	3.38931	3.80466	4.22234	1.83178	4.19195	5.22544	1.10485	2.75644	3.11705	3.0594	6.09113	3.88453	3.32392	6.11067	3.30775	1.36724	3.6174
NM_003215	TEC	5.2226	6.56137	6.13338	5.28744	3.1857	2.62487	6.2558	5.80047	2.36266	7.73629	5.19066	2.34591	3.54178	2.97198	2.22206	7.33642	5.24108	2.72479
NM_032814	RNFT2	1.22678	1.30358	2.7551	1.48353	1.16809	0.82272	0.588781	0.276213	0.630044	0.600877	2.13127	0.740814	2.13268	1.44688	0.740687	1.7811	1.82299	1.03354
NM_181864	ACOT7	26.5686	23.03	21.516	20.1988	57.5551	15.5925	12.9532	8.83882	36.0306	17.463	19.422	26.5458	21.0603	20.6865	27.1277	22.4333	21.3441	29.2211
NM_017892	PRPF40A	52.3311	54.1856	41.2609	54.7764	70.1386	38.3936	50.4144	36.7363	47.7652	93.0233	62.6317	47.4944	93.0003	85.1707	65.1805	101.947	80.3633	74.65
NM_015179	RRP12	10.1648	8.6471	14.2019	6.1243	17.7868	4.9755	7.80135	14.0869	4.72533	9.23849	7.94068	4.97991	9.63516	12.0052	4.81447	11.1955	15.4194	4.60396
NM_005514	HLA-B	545.569	509.744	598.185	550.845	480.51	832.553	271.097	165.175	460.641	203.66	327.562	438.767	284.599	268.221	420.895	123.15	134.521	404.773
NM_138571	HINT3	17.0348	17.6853	10.4628	10.2706	12.3712	14.0254	15.7131	8.01018	15.0029	21.6316	15.6064	15.804	20.946	20.5301	16.5729	16.1995	17.8501	20.1071
NM_001164278	SLC37A4	25.5872	21.9002	28.5678	16.9655	19.9372	34.2016	27.4519	16.5728	38.8264	20.3547	19.0439	24.4468	19.2703	15.6811	24.9519	15.6482	19.0654	21.7984
NM_003545	HIST1H4E	12.6885	8.25602	11.1844	16.2047	19.4062	7.60037	7.58056	6.3529	12.6796	30.3819	13.647	12.1823	20.032	14.5471	15.8322	19.6345	9.19089	8.26834
NM_016299	HSPA14	7.2205	9.4727	8.82288	7.03724	15.2914	8.54062	8.20614	6.07669	11.577	13.8202	12.2376	12.3469	10.7015	9.85446	12.4991	10.6018	8.58322	11.0871
NM_138277	C6orf25	0.245357	0.260717	0.196793	0.228235	0.371665	0.470126	0.404787	1.65728	0.393777	0.337993	0.412503	0.205782	0.609338	0.39105	0.462929	0.593699	0.151915	0.234896
NR_026960	LINC00319	0.140204	0.217264	0.163994	0.0760783	0	0	0	0	0.275644	0.0751097	0.309377	0.0411563	0	0.07821	0	0.339256	0	0.563751
NM_021972	SPHK1	1.22678	0.825602	1.04956	1.97803	0.822974	0.979429	0.515184	2.2097	1.18133	0.450658	0.481253	0.576188	0.41892	0.46926	0.740687	0.805734	1.4432	0.61073
NM_001242312	FAM124A	0.841224	0.564886	1.08236	1.33137	0.902616	0.626834	0.883172	1.65728	1.0632	0.262884	0.584379	0.905439	0.952091	0.15642	1.3425	0.212035	0.303831	0.516771
NM_001214903	ESR2	0.70102	0.521433	0.426385	0.342352	0.610593	0.54848	0.220793	0	0.630044	0.525768	0.446878	0.288094	0.152335	0.07821	0.370344	0.212035	0.303831	0.281875
NR_001559	VENTXP1	0	0	0	0	0	0	0	0	0	0	0	0	0	0	0	0	0	0
NM_182776	MCM7	27.7604	29.7651	38.473	24.1549	61.4575	17.2379	27.4519	27.8975	38.3933	33.0107	34.3752	28.439	25.2875	21.0776	28.7479	48.8953	43.9795	21.4225
NM_005899	NBR1	119.594	118.583	86.0969	104.532	88.0582	147.032	143.258	83.6925	129.631	145.976	137.535	121.946	139.424	159.275	146.147	104.364	72.1598	147.562
NR_028301	LOC344595	0.280408	0.130358	0.81997	0.760783	0.610593	0.666011	0.515184	1.10485	0.472533	0.600877	0.72188	1.02891	0.380837	0.62568	0.694394	0.169628	0.303831	0.563751
NR_023343	RNU4ATAC	0	0	0.0327988	0	0	0	0	0	0	0.0375548	0	0	0	0	0	0	0	0.0469792
NM_021147	CCNO	3.08449	3.51967	4.75583	4.29842	6.02629	0.509303	4.89425	6.62911	1.14195	1.42708	2.13127	0.658501	2.13268	2.50272	0.972152	4.28311	6.15258	0.845626
NM_033168	B3GALNT1	0.385561	0.695244	0.229592	0.114117	0.0265475	0.54848	0.147195	0.552426	0.275644	0.187774	0.515629	0.535032	0.990175	0.586575	0.138879	0.763327	0.607662	0.563751
NR_033769	ASB9P1	0.315459	0.0434528	0.360787	0.380391	0.159285	0.391771	0.551983	1.10485	0.275644	1.08909	0.481253	0.452719	0.228502	0.742995	0.185172	0.763327	0.227873	0.798647
NR_001542	TTTY10	0.35051	0.260717	0.26239	0	0	0	0.515184	0.828639	0.236266	0.413103	0.103126	0.246938	0	0	0	0.466478	0.455746	0.0939584
NR_024192	HILS1	0.070102	0	0	0	0	0	0	0	0	0	0	0	0	0	0.0925859	0	0	0
NM_145815	CACNG6	0.035051	0.0434528	0.0327988	0	0	0	0	0	0	0	0	0	0	0	0	0	0	0
NR_027781	MT1DP	0	0.0869055	0.0327988	0.190196	0.0265475	0.587657	0.588781	0	0.393777	0.225329	0.137501	0.246938	0.266586	0.039105	0.185172	0	0.151915	0.140938
NM_023036	DNAI2	0	0	0	0.0760783	0	0	0	0	0	0	0	0.164625	0	0	0	0	0	0
NM_001146688	KDM3A	43.4282	48.0587	28.7318	65.7697	61.431	51.1653	66.7163	72.3678	39.9684	69.6642	39.2565	31.9373	57.4301	77.9362	42.4506	58.3521	43.9795	56.61
NM_001077511	TCF19	7.43081	8.95127	8.2653	6.27646	16.5657	4.15278	5.37263	4.69562	11.6164	6.72231	10.0032	9.75405	7.19781	4.22334	9.07342	6.86994	6.98811	5.35563
NR_038379	LOC554206	0.210306	0.0434528	0.327988	0.798822	0.31857	0.27424	0.404787	1.10485	0.630044	0.300439	0.412503	0.576188	0.609338	0.31284	0.555515	0.763327	0.531704	0.422813
NR_026950	LOC283922	2.94428	2.17264	3.37828	4.71685	2.28309	5.05385	2.57592	10.2199	1.65386	4.95724	3.40315	3.53944	2.39927	2.15077	1.85172	5.89458	7.3679	4.60396
NM_001005377	PLAUR	43.5333	25.5068	47.2959	37.2023	133.826	47.8745	7.91175	16.0204	69.6592	8.37473	8.59381	13.5816	13.2912	16.6196	39.7656	15.2241	12.4571	47.59
NR_049820	MIR5188	0	0	0	0	0	0	0	0	0	0	0	0	0	0	0	0	0	0
NM_001757	CBR1	19.3832	18.5543	23.9431	15.7482	12.9286	11.2438	7.76456	4.14319	18.3894	20.0167	27.3283	30.6203	14.6241	17.128	19.2116	13.231	12.3811	19.9192
NM_001195545	LRRC3C	0	0	0	0	0	0	0	0	0	0	0	0	0	0	0.0925859	0	0	0
NM_000774	CYP2F1	0.105153	0.0869055	0.0655976	0.114117	0.345118	0.117531	0.33119	0.276213	0	0.187774	0.0343752	0	0	0.039105	0.0462929	0.0848141	0.455746	0.140938
NM_001039573	SEC14L1	24.5707	19.9883	25.4847	36.7458	24.5034	22.2918	22.0057	16.0204	38.7477	20.1294	22.6533	22.9241	19.6892	22.4463	33.3772	17.09	17.3943	26.9191
NM_001113361	TBC1D14	79.6008	79.1709	84.8177	67.6336	47.7856	62.4484	73.2297	46.4038	67.3753	69.852	68.9224	66.344	68.5125	73.4783	62.0325	55.8501	46.3342	57.2677
NM_001135047	JDP2	4.41642	3.2155	3.60787	3.23333	3.84939	6.62094	2.75991	6.07669	2.67769	2.62884	2.81877	5.39148	2.62777	2.50272	5.50886	1.95072	2.35469	5.44959
NR_033172	FRMPD2P1	0	0	0	0	0	0.0391771	0	0	0	0	0	0	0.0761673	0	0	0	0	0
NM_001243232	TCF4	18.0513	15.6864	25.2223	27.7305	12.7428	14.1429	14.094	22.097	21.7365	14.2333	18.2876	15.9275	10.8158	12.0443	15.2767	9.66881	12.0773	12.0267
NM_002986	CCL11	9.77923	5.47505	20.3025	4.5647	1.0619	0.195886	2.17113	0.552426	0.354399	0.675987	8.83444	0.246938	8.83541	4.65349	0.324051	6.06421	3.79789	1.31542
NM_004221	IL32	63.0918	36.5003	34.9307	66.3783	44.2547	86.699	27.3783	37.565	54.735	22.1949	27.7752	40.5801	27.4964	26.2003	44.3486	17.811	16.7107	41.6706
NM_017504	OR2M4	0	0	0	0	0	0	0	0	0	0	0	0	0	0	0	0	0	0
NM_014879	P2RY14	4.24117	3.73694	6.06778	4.33646	1.08845	2.70322	3.0175	1.93349	2.32329	1.61486	3.50628	2.05782	4.53195	2.73735	2.82387	2.62924	4.48151	5.59053
NR_024010	UGT2A3	35.6819	57.3142	26.3702	23.8125	0.716783	58.2956	79.6327	8.01018	55.562	1.99041	16.9814	71.6531	25.6684	8.01652	74.3465	108.18	20.8124	97.7638
NR_023313	CIRBP	49.8776	42.3664	55.1348	52.5701	36.1843	46.0723	59.4301	107.447	47.4502	46.7558	40.8378	43.0495	36.408	45.9875	34.3031	40.0323	36.4597	34.5297
NM_001136153	ATF6B	34.4902	30.1997	32.9628	38.3434	25.4591	38.0018	27.4151	31.2121	26.58	34.6256	35.0284	28.6859	30.8858	34.3342	34.3957	27.2253	22.4075	31.8519
NR_040724	RBM39	84.7182	90.9466	75.798	72.9591	82.2974	82.4679	80.6999	151.088	96.1604	121.79	94.7382	84.782	100.16	102.651	106.983	150.884	175.159	119.891
NR_029461	LST1	5.39785	2.86788	6.82215	3.3094	1.53976	1.09696	1.43515	1.93349	1.73262	1.31442	2.50939	0.864283	2.66586	1.64241	1.62025	1.10258	2.43065	1.64427
NR_029462	LST1	5.1525	2.78098	6.19897	3.04313	1.43357	1.01861	1.32476	1.93349	1.69324	1.1642	2.33752	0.78197	2.5516	1.44688	1.43508	1.06018	2.27873	1.55031
NM_022080	NAPB	3.435	3.04169	3.31268	4.45058	5.76082	5.13221	6.07181	10.7723	4.13466	6.91009	5.56879	6.83195	2.93244	3.75408	6.48101	6.40347	10.6341	6.24824
NM_001006939	LRRC18	0.140204	0.173811	0.360787	0.646665	0.185833	0.156709	0.0735977	0.552426	0.118133	0.225329	0.343752	0.288094	0.228502	0.15642	0.0462929	0.127221	0.151915	0.187917
NM_014550	CARD10	15.6327	15.9472	20.2041	14.3788	16.9373	24.4465	13.3212	18.5063	18.4682	9.20093	10.3813	13.1289	11.0062	12.5527	13.425	11.5771	15.7992	12.1206
NR_031610	MIR1205	0	0	0	0	0	0	0	0	0	0	0	0	0.0380837	0	0	0	0.0759577	0
NM_006918	SC5D	19.1028	22.6389	13.8411	14.2647	32.8128	28.5993	24.876	13.2582	27.0919	22.1949	19.1814	25.2288	21.8219	19.2005	28.1924	24.6809	21.9518	41.9994
NM_001083962	TCF4	18.6471	15.9472	25.8127	28.3772	12.9286	14.6131	14.7563	23.2019	22.4453	14.4211	18.8376	16.2979	11.4251	12.5136	16.0637	10.2201	12.4571	12.4965
NM_001164211	LRCH1	10.1648	8.29948	9.93804	10.1564	8.33593	6.81682	8.57413	12.1534	6.37919	9.95203	7.18443	4.93876	6.66464	8.68131	7.40687	7.71809	8.35535	6.48313
NM_001145318	DSN1	4.69683	7.43042	5.4118	5.21136	13.4861	4.15278	6.403	6.07669	9.41128	11.4167	10.9657	5.59726	9.74941	6.06127	7.40687	12.086	12.6849	6.71803
NR_004397	SNORD1C	0.035051	0	0.0327988	0	0	0	0	0	0	0	0	0	0	0.039105	0	0.169628	0.0759577	0
NM_001168320	TSPAN9	2.87418	2.86788	1.67274	2.09215	1.59285	1.68462	2.90711	3.59077	2.20515	1.80263	3.8844	1.6051	3.16094	2.62003	1.57396	2.16276	2.88639	0.798647
NR_024215	SNAR-A4	0	0	0	0	0	0	0	0	0	0	0	0	0	0	0	0	0	0
NM_001202553	MIA	0.35051	0.0434528	0.163994	0.0760783	0.21238	0.509303	0.33119	1.10485	1.18133	0.751097	0.103126	0.246938	1.18059	0.86031	0.185172	0.127221	0.835535	0.187917
NM_016223	PACSIN3	0.105153	0.651791	0.229592	1.71176	2.65475	0.391771	1.32476	1.93349	0.905688	1.9153	0.893756	0.699657	0.380837	0.39105	0.740687	3.09572	2.50661	0.751668
NM_001075098	MOCS1	9.28851	9.99413	7.60932	8.21645	2.30964	11.3222	8.97892	10.4961	5.27661	4.99479	5.29379	7.94317	7.57865	2.93287	12.7306	3.13812	3.57001	7.65761
NM_198445	RINL	1.8577	0.869055	1.77114	1.5596	1.27428	0.352594	0.662379	0.828639	0.472533	1.95285	1.85626	0.205782	2.0946	2.73735	0.879566	2.07795	1.89894	0.469792
NM_000399	EGR2	3.5051	0.999413	3.11589	4.71685	2.09726	4.38784	1.03037	0.828639	3.38648	0.901316	1.95939	2.30475	1.56143	1.6033	3.14792	0.848141	0.455746	2.95969
NM_032121	MAGT1	34.6654	38.1081	30.2405	23.9266	29.7332	34.946	38.2708	10.4961	50.2853	38.5688	38.7409	45.4777	37.9313	37.6972	55.8293	36.258	32.0542	54.1201
NM_020883	ZSWIM5	26.9192	20.249	17.6786	22.2909	20.1496	28.0117	31.095	16.5728	20.3977	28.3539	24.8877	20.8251	28.7151	26.6696	21.2022	26.4196	20.5086	21.5635
NM_032094	PCDHGA12	1.19173	0.869055	0.623177	1.40745	0.477856	0.744366	1.83994	2.48592	0.708799	0.525768	0.446878	0.617345	0.875924	0.977625	0.370344	0.339256	0.227873	0.469792
NM_030903	OR2W1	0	0	0	0	0	0	0	0	0	0	0	0	0	0	0	0	0	0
NM_021947	SRR	16.7544	18.8585	20.7288	18.1827	35.4675	13.0852	21.2697	9.39124	15.8692	16.9748	19.422	16.4625	16.9853	21.6251	12.4991	18.3199	16.6347	14.5166
NM_001100595	SKA2	6.90504	9.03817	6.72376	8.90116	31.4057	7.75707	5.37263	3.03834	8.85999	11.304	16.5001	9.46595	11.3489	7.78189	12.3602	16.7508	14.2801	14.0938
NM_000983	RPL22	142.482	173.072	121.618	130.398	145.029	88.8538	170.379	67.396	100.61	126.41	163.867	132.441	145.061	147.66	83.4199	151.266	161.03	80.4754
NR_049725	NAV2-AS5	0.210306	0.173811	0.295189	0	0	0	0.147195	0	0	0.0751097	0.103126	0.288094	0.0380837	0	0.185172	0	0.0759577	0.0469792
NM_001036645	HHLA3	3.75046	2.99824	5.05102	3.27137	3.87594	2.93829	4.04787	0.828639	3.66213	2.62884	4.05628	3.25135	4.76046	4.65349	1.43508	3.47738	3.49406	2.86573
NM_004197	STK19	7.71122	5.69231	8.52769	5.02117	5.12367	7.7179	6.10861	17.4014	9.25376	1.9153	6.63442	6.42038	3.27519	3.9496	3.33309	3.26534	3.19022	3.42948
NM_001040179	MCHR2	0	0	0	0	0	0	0	0	0	0	0	0	0	0	0	0	0	0
NM_201222	MAGED2	28.0408	27.4621	32.0116	29.8227	24.291	32.3211	39.2644	22.9257	28.7457	34.9635	29.7346	26.7516	24.145	27.8036	21.341	14.2488	12.3811	22.8789
NR_026699	GLYCTK	8.20193	7.12625	10.43	8.52077	4.88475	9.24581	9.86209	13.5344	11.1045	10.7031	9.59069	7.49045	6.96931	4.96633	5.9255	11.6195	10.6341	7.14084
NM_033295	CASP1	11.7421	13.2096	12.6603	5.55371	3.37154	6.42505	5.66702	1.10485	3.50462	3.64282	3.98753	4.32141	3.38944	4.06692	5.78662	2.33239	4.48151	3.24157
NM_001204513	RBAK-LOC389458	0.420612	0.47798	0.754373	0.532548	0.769879	0.626834	0.588781	0.828639	0.551288	0.863761	0.412503	0.288094	0.952091	0.821205	0.462929	1.27221	1.13937	0.845626
NM_001142930	API5	48.8961	53.6207	39.5882	45.4948	64.6963	43.4083	55.7502	31.7645	55.5226	80.2547	57.3723	52.7212	68.2078	64.2104	62.8195	79.4708	59.5509	64.4085
NM_003632	CNTNAP1	2.41852	1.73811	1.86953	1.29333	1.19464	1.8805	1.54555	4.69562	1.69324	1.53975	0.584379	1.35816	1.44718	1.52509	2.73128	1.06018	2.12682	1.3624
NR_027679	RPAIN	8.76275	11.0805	9.18367	7.53175	7.96426	6.62094	7.35977	8.83882	6.8911	9.98958	7.18443	6.25576	7.9214	10.441	7.40687	5.9794	7.21598	6.85897
NM_018666	SAGE1	0	0	0	0	0	0	0	0	0	0	0	0	0	0	0	0	0	0
NR_075080	LZTFL1	11.2163	11.7322	7.08454	18.8674	17.7868	10.3036	12.6956	7.45775	7.32426	21.6316	16.947	8.84861	20.6794	20.2955	9.58264	20.1434	13.7483	10.6643
NM_001910	CTSE	102.314	93.9014	89.3112	553.622	151.029	87.0908	47.2865	16.0204	96.7904	114.955	26.2627	79.0613	403.039	270.215	82.957	15.8602	10.6341	82.2136
NM_001199288	PHOSPHO2	1.6474	1.91192	0.524781	2.01607	1.115	1.60626	2.24473	0.276213	0.984443	2.51617	2.02814	1.6051	2.36119	3.05019	1.57396	2.50202	2.35469	2.39594
NR_046931	RNU6-57	0	0	0	0.0760783	0	0	0	0	0	0	0	0	0	0	0	0	0	0
NM_001129778	GRAPL	0.525765	0.434528	0.721574	1.02706	0.530951	0.352594	0.0367988	0	0.708799	0	0.206251	0.123469	0.228502	0.07821	0	0.127221	0.151915	0.0469792
NM_001199535	TGIF2-C20orf24	28.9872	31.8943	27.1902	24.307	31.9898	29.9313	17.8106	5.52426	40.7953	23.8849	43.7941	47.659	27.4583	23.9323	36.2937	29.4305	21.496	32.8855
NM_006772	SYNGAP1	5.53806	3.65003	5.67419	6.23842	4.83165	4.89714	4.96784	14.9155	3.81964	6.19655	5.87817	3.74522	4.91279	4.10602	4.12007	5.85217	7.44386	3.24157
NR_033256	XAGE1D	0	0	0	0.304313	0.159285	0	0	0	0	0	0	0	0	0	0	0.339256	0	0
NM_006962	ZNF182	5.78341	6.47446	4.75583	4.48862	6.26522	3.80018	6.4398	8.28639	4.68595	5.93366	4.33128	2.9221	6.43614	7.46905	4.02749	2.20517	1.82299	4.46303
NM_173468	MOB1B	23.7996	23.2907	15.317	20.7313	8.36247	21.7825	24.14	12.982	17.3262	29.5932	24.6814	24.3645	29.8576	24.9881	19.906	25.1898	22.5594	29.1741
NM_032636	PSRC1	1.29689	2.52026	1.27915	1.86392	2.78749	0.626834	1.25116	0.828639	1.37822	1.72752	1.89064	0.987751	1.75185	1.09494	0.833273	2.84127	0.911493	0.375834
NM_001127386	DUX4L2	0.280408	0	0	0	0	0	0	0	0	0	0	0	0	0	0	0	0	0
NM_013235	DROSHA	29.9686	29.7651	32.1428	28.7956	42.3168	28.0508	34.6277	59.3858	29.7696	50.6239	31.2815	24.4057	47.9473	49.898	34.2568	44.5274	38.4346	40.0263
NM_001111309	PDE4A	12.6885	10.4287	10.922	21.1498	22.1406	9.52005	17.2587	24.583	5.43413	16.0359	14.197	8.39589	14.7384	14.8208	6.99023	15.9026	18.6096	7.09386
NM_033142	CGB7	0	0.0434528	0.0655976	0.114117	0.159285	0	0.0367988	0	0	0	0	0	0	0	0	0	0	0
NM_020908	TLE3	25.5171	22.074	29.3221	27.6164	17.1232	39.5297	22.3737	19.8873	26.0681	18.477	25.9189	31.4434	14.129	14.6644	29.2108	20.3978	19.5971	28.4224
NM_020150	SAR1A	30.95	28.5919	27.4198	32.4854	46.06	34.1233	35.1429	24.8592	34.8493	47.1689	38.3284	34.2421	33.5136	37.4235	40.0434	36.0036	27.7246	48.3416
NM_001004431	METRNL	19.6987	18.2067	17.0882	18.0686	18.424	33.5356	13.726	6.07669	23.4297	6.6472	9.55632	27.904	5.17938	6.17859	21.6188	8.09975	7.82365	20.1541
NM_001003941	OGDH	8.27203	7.56078	9.64285	4.41254	6.53069	7.28695	5.18864	3.31456	13.6641	4.99479	5.87817	9.54826	5.67446	6.37411	9.25859	5.76736	5.08917	8.64418
NM_001168316	UGT3A2	0.245357	0.0869055	0	0.0760783	0	0.0783543	0	0	0	0.0751097	0	0	0	0	0	0	0	0.0939584
NM_001172418	BTBD9	12.2678	13.7745	14.8907	15.3678	8.25628	26.8755	20.4602	20.716	29.5333	13.67	14.4376	24.1588	13.4435	11.3013	24.6741	12.2556	13.2926	23.2077
NM_001083909	GPR123	0.070102	0	0	0	0	0.117531	0	0	0	0	0	0.0823126	0	0	0	0	0	0
NM_182532	TMEM61	3.39995	3.2155	2.49271	2.85294	1.03535	10.3819	3.93748	2.2097	7.79679	3.79304	5.15629	7.8197	3.12286	2.50272	4.49042	3.43497	1.9749	6.71803
NM_178353	LCE1E	0	0	0	0	0	0	0	0	0	0	0.0343752	0	0	0	0	0	0	0
NM_001030060	SAMD5	28.847	27.2014	21.7456	24.7254	58.086	9.48087	61.1965	35.9077	10.4745	47.5069	39.7378	18.5203	34.0468	33.1219	16.8506	42.8311	57.9557	26.9661
NM_206812	MOG	0	0	0	0	0	0	0	0	0	0	0	0	0	0	0	0	0	0
NM_004291	CARTPT	0	0	0	0	0	0	0	0	0	0	0	0	0	0	0	0	0	0
NM_001098479	HLA-F	26.6738	22.8996	28.4694	36.974	39.7948	59.1183	12.3276	12.4296	24.6898	18.9276	17.6345	23.171	20.7175	19.5916	29.4423	10.4745	8.8111	26.5902
NM_199122	TBRG4	30.4944	29.5913	43.3272	20.6552	27.7422	19.3927	19.393	29.831	22.0909	20.8805	22.6533	23.9118	26.5443	24.7144	16.9895	29.1337	27.4967	16.6776
NR_033649	SF1	50.8239	41.9754	50.9366	48.8422	63.5548	46.1898	46.5873	67.1198	36.0306	52.6894	54.3473	48.6468	48.5186	51.3057	35.6456	57.6312	53.7021	43.1269
NM_003625	PPFIA2	0.105153	0.304169	0.26239	0.266274	0.132738	2.27227	0.588781	3.03834	1.37822	0.488213	0.515629	1.81088	0.609338	0.508365	2.73128	0.212035	0.531704	2.06709
NR_052013	NBAS	31.2304	33.4586	24.3695	34.5776	37.3524	26.5621	35.2901	44.1941	26.3831	35.8649	32.1752	25.5581	40.7495	43.4065	26.4796	38.9297	50.4359	31.1472
NM_004337	OSGIN2	7.04525	5.60541	3.93586	4.98313	6.37141	4.50537	4.82065	4.69562	5.51288	6.2341	5.63754	5.30916	6.35997	6.06127	5.41627	9.71122	10.1783	6.57709
NM_001145641	SRRM5	0.070102	0	0.196793	0.152157	0.371665	0.235063	0.147195	0.828639	0.118133	0.225329	0	0.123469	0.0380837	0	0.138879	0.381664	0.68362	0.328855
NR_031756	MIR711	0	0	0	0	0	0	0	0	0	0	0	0	0.0380837	0	0	0	0	0
NM_000207	INS	0	0	0	0	0	0	0	0	0	0	0	0	0	0	0	0	0	0
NM_007160	OR2H2	0	0	0	0	0	0	0	0	0	0	0	0	0	0	0	0	0	0
NM_000364	TNNT2	0.140204	0.0869055	0.163994	0	0.159285	0.235063	0	0	0.0787554	0.0751097	0.103126	0.0411563	0.0761673	0	0.0462929	0	0.911493	0.0939584
NM_032687	CYHR1	4.73188	5.04052	3.70627	5.09724	3.21225	5.40645	5.15184	11.6009	3.15022	5.52056	4.60628	4.60951	4.22729	4.92723	3.61085	4.15589	5.01321	3.42948
NM_001109809	ZFP57	0	0	0	0.570587	0.0265475	0.156709	0.147195	0	0.236266	0	0	0	0	0.039105	0.138879	0	0	0
NM_016161	A4GNT	0	0.0869055	0	0	0	0	0.0735977	0.552426	0	0	0	0	0	0	0.0925859	0	0	0
NM_001256348	SEMA5B	1.54224	0.912508	0.918367	0.8749	0.716783	0.54848	0.919971	1.93349	0.118133	0.0375548	1.20313	0.0823126	0.723589	0.351945	0.277758	0.296849	0.455746	0.0939584
NM_004482	GALNT3	61.3743	63.6583	48.3126	74.9751	74.8906	90.0291	94.0578	38.1174	115.928	86.7892	93.5007	97.8286	72.5874	84.545	92.7711	88.2915	78.5403	112.656
NM_172165	MSH5	4.52158	3.91075	6.82215	4.1843	3.66356	4.23113	7.21257	32.3169	3.42586	10.4778	4.77816	4.73298	5.25554	7.23442	4.81447	9.15993	21.0403	5.49657
NM_001130001	C3orf55	1.15668	0.651791	0.295189	0	0.371665	0	0	0	0	0.0375548	0.206251	0	0.0761673	0	0	0	0	0.0469792
NM_178812	MTDH	91.413	101.375	77.93	81.0614	105.261	70.4405	78.9703	51.3756	73.0457	108.871	103.813	80.5429	110.138	109.455	83.4199	149.103	152.675	89.1666
NM_000535	PMS2	13.4245	12.7317	14.3987	10.8792	14.0967	10.0293	14.7563	10.4961	11.6558	13.8577	12.4095	9.87751	13.7482	13.5694	9.76781	15.9875	10.6341	8.87907
NM_015123	FRMD4B	19.7337	17.0335	21.9424	16.3568	12.5835	26.1312	17.1115	16.5728	39.6534	13.1817	15.7782	21.0309	16.5283	17.6363	27.1277	9.37196	8.65918	37.7243
NM_003142	SSB	15.4224	19.0758	12.5619	17.0796	23.2025	9.79429	20.0186	10.7723	11.3014	37.4046	21.0033	16.0921	41.2827	35.6246	18.7486	42.9159	31.6744	25.3218
NM_001126123	ENOSF1	21.4512	23.9859	24.6319	26.7796	43.9362	25.7002	29.9911	91.9789	33.156	34.588	29.9408	31.9785	27.2298	25.4573	30.3219	33.2895	32.1301	29.409
NR_049846	MIR5582	0	0	0	0	0	0	0	0	0	0	0	0	0	0	0	0	0	0
NM_181702	GEM	19.3832	13.9918	14.2019	5.09724	5.81391	3.99607	3.60629	5.80047	7.32426	3.9057	4.1594	2.01666	3.31328	5.82664	4.35154	4.24071	5.54491	5.8724
NM_020198	CCDC47	93.0604	98.5508	86.6217	69.4975	122.092	108.246	118.639	27.0689	125.851	109.998	75.213	124.086	121.677	105.075	162.951	103.558	73.2233	150.709
NR_037502	MIR3938	0	0	0	0	0	0	0	0	0	0	0	0	0	0	0	0	0	0
NM_001136474	VASH2	0.665969	0.608339	0.623177	1.0651	1.30083	0.27424	0.33119	0	0.905688	0.112664	0.446878	0.493876	0.647422	0.117315	0.555515	0.848141	1.4432	0.375834
NM_001167	XIAP	26.6738	32.5896	20.9584	29.8227	23.4946	41.2535	26.6424	32.0407	33.8648	34.2876	33.1034	41.9383	29.3244	32.1443	46.8485	36.6397	50.5119	52.053
NM_001099411	GPRASP1	1.82265	2.17264	2.7879	1.86392	1.22119	3.05582	3.38549	2.76213	3.26835	3.79304	1.71876	2.88094	1.8661	0.742995	3.19421	2.84127	2.96235	2.91271
NM_006487	FBLN1	13.5998	6.73518	18.6953	10.5749	6.63688	7.52201	7.83815	3.03834	11.9708	6.6472	8.04381	9.58942	7.95948	5.04454	10.5085	4.24071	3.72193	5.59053
NM_018638	ETNK1	66.3515	81.2132	40.3425	83.8002	44.1751	44.4661	45.7778	146.117	42.0948	75.8232	60.4661	50.0461	79.4044	64.2886	49.9038	178.661	182.526	82.0257
NM_003427	ZNF76	10.1648	8.51674	12.3324	6.01018	5.99974	11.4005	9.4573	14.6393	10.3957	9.16338	8.38756	8.02548	6.96931	8.6422	8.37902	5.9794	7.21598	7.2348
NR_046648	HLTF-AS1	0.175255	0.347622	0.131195	0.342352	0.31857	0.156709	0	0	0.315022	0.150219	0.275002	0.0411563	0.342753	0.39105	0.231465	0.0424071	0	0.0469792
NM_001098817	INO80C	4.52158	5.21433	4.72303	4.60274	6.07939	4.19195	4.26867	4.97183	7.08799	5.67078	3.64378	6.33807	4.76046	4.92723	5.09222	4.36793	3.57001	4.69792
NM_001553	IGFBP7	100.316	80.2572	91.6399	74.0622	74.4127	25.2693	53.5423	137.002	34.8099	54.6798	67.1349	32.6781	81.956	82.0032	34.1642	47.7928	84.3131	24.852
NR_073143	PGR	0.665969	0.521433	1.04956	1.10313	0.345118	0.783543	0.846373	1.10485	0.787554	0.563322	0.378128	1.15238	0.380837	0.15642	0.509222	0.339256	0.531704	0.939584
NM_001039690	CHTF8	45.8116	40.9759	49.5262	44.2015	36.5294	33.8099	45.557	25.964	31.4234	38.4937	42.4191	39.3043	47.0333	42.7809	29.9515	27.0557	19.5211	25.8386
NM_001142528	BHLHB9	2.76903	3.25896	1.14796	3.76587	2.78749	1.72379	3.53269	2.2097	1.96889	1.20175	2.75002	1.68741	2.28502	3.71497	2.12948	2.96849	4.10172	2.20802
NR_034041	SRSF1	60.7784	80.6483	69.1399	57.1728	92.173	59.2358	73.2297	72.9202	78.8342	78.8651	65.2442	68.4841	59.0297	57.9927	74.0687	84.7717	75.1222	73.1936
NM_001014437	CARS	13.9503	12.1233	13.3491	11.2596	28.3528	16.9245	13.6524	22.097	16.6174	14.1582	14.6095	14.3636	16.9472	18.8877	23.4705	13.7399	16.9386	18.3219
NM_014827	ZC3H11A	76.271	77.6066	70.6814	62.6885	74.2269	77.2965	90.0468	159.099	77.8891	94.15	88.2413	81.4895	74.5678	86.031	85.7345	78.7499	87.5033	86.3478
NM_014521	SH3BP4	77.2173	74.2608	69.3695	51.2387	75.2888	49.5591	68.0411	45.2989	58.7516	47.3191	65.8973	57.8658	97.0752	96.3547	42.358	49.9979	40.4855	53.9791
NM_001270364	ALDH1L1	23.344	20.4662	9.67565	25.7905	8.62795	4.70126	28.5191	27.3451	2.63831	22.0071	9.59069	5.51495	26.1254	30.1108	2.82387	6.91235	0	8.3623
NM_144682	SLFN13	7.99163	17.6853	6.33017	10.3466	18.3709	8.97157	2.06074	1.38106	7.36363	0.938871	11.0345	6.54385	1.48526	0.7821	5.41627	10.7714	10.3303	5.40261
NR_046435	PCGF5	14.3709	13.0358	9.93804	15.596	10.4066	13.2811	7.83815	6.07669	14.0185	7.73629	14.8501	13.7462	15.8428	12.3963	20.4152	9.88085	9.57067	17.3353
NM_006714	SMPDL3A	12.8287	13.2096	8.49489	32.2191	8.97307	58.4131	14.5723	5.80047	33.156	16.7495	10.2438	42.2675	18.6229	13.2566	38.7472	11.6619	7.67173	45.4289
NR_038945	LOC100128264	0	0	0	0	0	0	0	0	0	0	0	0	0	0	0	0	0	0
NM_001135914	KCP	0.175255	0.738697	0.229592	0.114117	0.477856	0.117531	0.183994	3.59077	0.354399	0.375548	0.171876	0.205782	1.10443	0.07821	0.138879	0.0424071	0	0.140938
NM_001145108	NELL2	1.6474	2.60717	3.87026	1.52157	1.27428	13.2027	5.40943	0	4.64657	2.85417	1.44376	3.70407	1.48526	1.44688	4.44412	0.932955	0	2.20802
NM_003624	RANBP3	20.7852	19.7276	21.9096	25.3341	47.7059	19.9412	20.1658	19.8873	19.3345	18.7023	18.7345	16.9976	17.0234	18.3011	15.6933	23.7904	29.6995	15.4092
NM_015421	TMEM186	7.57101	5.04052	5.6086	7.07528	7.38021	4.15278	8.02215	1.10485	6.33981	6.2341	8.69694	7.07889	7.54056	5.00544	5.83291	4.41033	5.01321	4.7449
NR_037933	ADAM20P1	0.245357	0.260717	0.196793	0.494509	0.159285	0.27424	0.147195	1.10485	0.315022	0.225329	0.103126	0	0.114251	0.07821	0.185172	0.212035	0.911493	0
NM_015621	CCDC69	9.95448	8.29948	16.2682	24.9537	7.61914	6.03328	7.17577	5.52426	13.1128	5.483	9.14382	6.8731	2.20885	3.1675	5.41627	4.62237	3.4181	4.65094
NM_001164837	FXYD6	4.55663	4.82326	8.00291	7.60783	5.73427	6.89518	5.74062	6.90532	7.44239	4.09348	4.19378	8.88976	3.9607	3.63676	7.59204	2.62924	2.73448	5.49657
NR_026973	HLA-F-AS1	0.595867	0.651791	1.86953	1.44549	0.955711	3.33006	0.883172	0.276213	1.96889	0.976426	0.72188	2.22244	0.990175	0.62568	2.08318	1.10258	0.911493	3.14761
NR_034182	MATN1-AS1	0.490714	0.564886	1.14796	0.494509	0.504403	0.54848	0.147195	0.552426	0.630044	0.375548	0.481253	0.452719	0.571255	0.742995	0.416636	0.593699	0.759577	0.187917
NM_020056	HLA-DQA2	29.3026	18.2067	29.8797	64.4003	19.3001	20.7247	11.518	1.93349	20.3583	11.2289	9.69382	11.9765	17.0615	15.6029	19.906	10.4321	6.45641	20.0601
NM_153228	ANKFN1	0.140204	0.0434528	0.81997	0.304313	0	0.901074	0.551983	0.552426	0.51191	1.35197	0.515629	0.452719	0.190418	0.54747	0.138879	1.27221	1.13937	0.657709
NM_203291	RBBP8	18.577	22.3782	14.0707	20.8835	26.7068	10.4211	16.9643	19.8873	14.8848	27.753	14.8501	13.3758	28.8674	28.7813	16.0637	28.752	22.7114	16.8186
NR_039738	MIR4513	0	0	0.0327988	0	0.0265475	0.0391771	0.0735977	0	0.157511	0	0	0.0411563	0.0761673	0.039105	0	0.0424071	0.0759577	0.0469792
NM_001199183	ATP2C1	57.5888	48.2326	41.6545	54.472	48.582	48.6188	68.2986	45.8514	64.4613	69.5891	49.466	44.243	65.8085	78.8357	53.3295	52.2455	43.8276	55.7643
NM_001134941	GHRL	0.35051	0.217264	0.360787	0.494509	0.265475	0.509303	0.294391	0.552426	0.196889	0.413103	0.446878	0.164625	0.342753	0.31284	0.231465	0.339256	0.531704	0.187917
NM_001178074	GRIP1	3.36489	2.60717	4.32944	1.25529	0.345118	1.44955	2.98071	3.86698	1.33884	3.4926	3.3344	1.48163	1.18059	1.5642	1.71284	3.18053	1.13937	2.34896
NM_170679	SKP1	35.3664	39.3682	25.6487	36.7458	37.9364	36.043	45.8514	20.716	36.7	50.1733	41.1472	41.5267	47.6807	42.3116	40.4137	36.8941	24.1546	37.3485
NR_046186	PDLIM5	7.50091	6.47446	7.41253	7.53175	5.54843	9.75511	7.65416	9.11503	10.2382	5.14501	6.05004	10.3714	5.75063	5.20096	9.166	5.47051	5.46896	13.3421
NM_001172218	SCMH1	27.1996	27.4621	27.0262	30.8878	16.6719	24.1331	37.13	32.0407	19.7282	31.0578	31.4877	24.9407	28.8674	32.1443	21.6651	25.4442	24.1546	25.0399
NM_001098406	GAGE12J	0	0	0	0	0	0	0	0	0	0	0	0	0	0	0	0	0	0
NM_025141	TM2D3	9.91943	10.0376	10.5284	7.22744	7.24748	9.36334	10.6349	9.66745	7.87554	10.3276	8.52506	7.61392	9.06391	10.1282	7.40687	7.25161	10.4062	6.48313
NM_031939	MRO	0.595867	0.521433	0.196793	0.41843	0.159285	0.117531	0.220793	0	0	0.0751097	0.65313	0.0823126	0.571255	0.430155	0.0925859	0.212035	0	0
NM_013974	DDAH2	19.5585	15.643	17.1538	16.7372	27.4502	17.9823	29.4759	34.2504	28.5488	19.9041	20.9689	32.5135	14.0148	17.2453	30.5996	16.7932	13.3686	19.3554
NM_001173473	ASMTL	29.583	29.2003	31.1917	12.4008	8.97307	14.8873	30.6902	27.6213	21.579	0	23.7189	17.7384	8.3784	11.3796	6.71248	6.36106	5.08917	6.43615
NM_015710	GLTSCR2	89.4501	81.3436	101.939	96.239	72.2358	66.1702	110.433	36.1839	54.1444	94.0373	69.1286	51.9804	73.7299	99.2094	51.3852	106.654	113.937	56.61
NM_001256861	USP17L20	0.490714	0.695244	1.01676	0.114117	0.477856	0.509303	0.110397	0	0.196889	0	1.40939	0.32925	0	0	0	0	0.151915	0
NM_005333	HCCS	20.9254	23.6383	16.0386	19.0956	19.5921	22.7619	19.0618	6.90532	24.0598	18.1765	20.3158	27.9863	21.2126	20.3346	33.6087	18.235	11.9254	30.0667
NM_018348	FTSJD1	14.0204	17.1204	12.6275	14.4549	11.1765	15.4358	17.1483	11.8772	14.5304	13.7075	15.5032	15.804	14.8145	15.9939	12.8694	16.4115	14.2041	19.5903
NR_045090	TPD52L2	49.0013	49.0582	51.3629	47.3207	73.8552	49.4807	54.0943	41.1557	50.9154	44.3523	59.6067	43.5434	43.8724	46.8869	37.8676	54.6627	45.5746	34.4358
NM_001143999	SEC14L1	33.018	24.9419	34.5371	50.7822	33.795	28.8736	28.0039	23.4781	52.8055	26.5888	29.0127	30.2499	25.1352	29.5634	44.2561	23.3239	22.8633	36.8787
NR_037861	PPT2-EGFL8	5.39785	5.38814	6.62536	4.3745	4.83165	6.54258	6.10861	17.9538	3.38648	6.72231	5.01879	6.17345	5.33171	5.43559	7.59204	6.0218	6.45641	6.38917
NR_073459	LINC00516	0.210306	0.0434528	0.26239	0	0.238928	0.235063	0	0	0.118133	0	0.137501	0	0.0380837	0	0	0	0.303831	0
NM_139348	BIN1	14.3008	17.3811	16.301	20.0086	18.9549	17.9431	22.7417	12.7058	13.3884	13.4446	16.1907	14.6928	14.6241	15.642	9.99928	22.7302	14.1281	11.8857
NR_002598	SNORD87	0.105153	0.217264	0.327988	0.228235	0.292023	0.195886	0.147195	0.276213	0.315022	0.375548	0.378128	0.246938	0.114251	0.117315	0.185172	0.72092	0.0759577	0.422813
NM_152479	TTC9B	0	0	0.0327988	0.304313	0.371665	0	0	0	0.0787554	0.0751097	0.137501	0	0	0.07821	0	0.0848141	0.151915	0
NR_027000	LOC349196	1.47214	1.43394	0.787171	1.59764	0.584046	1.44955	0.0367988	1.65728	0.826932	0	0.859381	1.15238	0.152335	0.15642	0.370344	0.551292	0.68362	0.140938
NM_001105563	CCHCR1	8.51739	8.86436	10.266	4.67881	5.01748	8.2272	10.2669	15.1917	6.77297	9.42626	6.70317	6.58501	6.32189	7.66458	9.166	7.8029	7.82365	7.04688
NM_001933	DLST	21.6966	21.0311	19.3841	20.5031	23.2556	25.9353	18.6938	11.0485	21.9728	16.2988	17.7376	22.2244	20.3748	19.2005	24.9982	15.3089	13.0647	19.3085
NM_024898	DENND1C	12.8287	12.9489	15.3498	23.318	18.9549	21.0381	12.3276	6.3529	23.351	12.8438	13.8532	14.8163	10.93	10.7539	20.6467	12.6797	10.4062	17.3353
NR_039681	MIR4471	0	0	0	0	0	0	0	0	0	0	0	0	0	0	0	0	0	0
NM_148976	PSMA1	30.1789	34.067	27.5182	27.6164	36.6621	23.5846	21.8217	24.8592	33.0773	30.0063	31.6596	30.4968	34.123	34.0604	36.8492	35.9612	25.6737	35.9391
NM_001005290	PSRC1	1.19173	2.21609	1.21356	1.82588	2.70785	0.626834	1.14076	0.828639	1.33884	1.68997	1.78751	0.987751	1.67568	1.01673	0.833273	2.79887	0.835535	0.375834
NM_001143959	C2orf74	0.560816	0.521433	0.229592	1.10313	0.371665	0.626834	0.662379	1.38106	0.630044	0.976426	0.446878	1.23469	0.723589	0.39105	0.555515	0.424071	0.911493	1.08052
NR_046487	RNU6-19	0.035051	0	0.0327988	0	0	0.0391771	0.0367988	0	0	0	0	0	0	0.039105	0	0.0424071	0.0759577	0.0469792
NR_001575	RNF138P1	3.22469	3.08515	2.98469	2.8149	2.6813	8.81486	4.26867	9.94367	6.1823	2.85417	3.6094	5.92651	2.85627	2.46361	7.40687	4.32552	6.15258	9.02001
NM_020167	NMUR2	0.315459	0.304169	0.26239	0.0380391	0.159285	0	0	0	0.0393777	0	0.275002	0	0.0761673	0	0	0.636106	0.303831	0
NM_152912	MTIF3	23.8347	29.5044	27.1574	26.247	24.4503	27.0714	25.796	13.2582	21.8546	31.4709	28.6346	28.439	32.5234	34.8816	32.8217	25.7411	24.9141	28.7043
NM_003753	EIF3D	90.0109	96.2479	86.5561	76.0783	96.3941	52.3015	78.3079	36.1839	56.6252	112.74	78.4099	60.4998	116.307	126.622	56.57	105.424	95.4029	59.5697
NM_001207039	ETV7	2.48862	1.52085	2.42711	1.02706	2.33618	0.54848	0.919971	1.65728	0.590666	0.563322	0.515629	0.658501	0.380837	1.05583	1.2962	0.212035	0.987451	0.469792
NM_001838	CCR7	5.4329	3.73694	14.1691	8.52077	2.92023	2.78158	2.02394	0.552426	13.9791	0.938871	1.95939	1.64625	0.190418	0.7821	1.52767	1.1874	0.607662	0.469792
NM_005954	MT3	0	0	0.163994	0.41843	0.0530951	1.29285	1.10397	0	0.86631	1.01398	0.412503	1.39931	0.0380837	0	1.38879	0.0848141	0	0.751668
NM_001195259	TGFBR3L	0.140204	0	0.0327988	0.342352	0.10619	0.0783543	0	0	0	0.225329	0	0.0823126	0.0380837	0	0.0462929	0.0848141	0.151915	0
NM_001099272	BTBD9	12.6184	14.1656	15.0219	15.6721	8.38902	27.6591	21.2329	21.5446	30.439	14.008	14.4376	24.3645	14.129	11.9661	25.4611	12.7221	13.5964	23.9594
NM_001177676	GPR68	3.435	1.43394	4.23105	2.73882	1.46011	5.24974	2.46552	5.24805	1.92951	2.70395	2.85315	3.16904	1.37101	0.664785	1.66655	2.24757	2.05086	2.20802
NR_024205	LINC00152	1.89275	0.695244	1.80393	2.70078	2.28309	0.27424	0.699178	5.24805	0.86631	1.12664	1.03126	0.246938	1.52335	0.351945	0.185172	0.508885	0.531704	0.469792
NR_031642	MIR548F1	0	0	0	0	0	0	0	0	0	0	0	0.0411563	0	0	0	0	0	0
NM_001042397	PTPN20A	0.210306	0	0	2.13019	4.48653	1.17531	0	0	0.551288	0	0	0.164625	0	0.039105	0.509222	0.0848141	0	0.751668
NM_001194986	TRABD2B	0.280408	0.0869055	0.655976	0.0760783	0.185833	0.666011	0.515184	0	0.472533	0.187774	0.275002	0.246938	0.0761673	0	1.20362	0.254442	0.227873	0.61073
NM_001145303	TMC4	39.1169	31.4598	40.4409	52.1897	20.3885	78.4326	54.2047	38.6698	47.2533	37.7426	39.2565	62.3518	47.1476	50.3672	52.4499	35.3251	26.5092	44.9591
NM_007056	CLASRP	3.47005	3.60658	4.88702	3.61372	3.66356	3.64347	3.0175	10.2199	4.13466	5.74589	3.12815	3.53944	3.54178	5.20096	2.91646	6.0218	8.65918	5.21469
NM_053005	MOB2	12.3379	9.95068	6.85495	7.83606	6.66343	11.1263	7.91175	4.97183	10.4745	5.03235	5.80942	5.92651	6.09338	6.13948	7.49946	5.4281	6.45641	6.85897
NM_001037866	RGPD6	32.983	27.5056	18.5969	21.7584	32.8658	32.7129	40.4787	72.644	33.8255	0.187774	28.2221	32.8016	10.0541	13.2175	13.5175	11.874	11.8494	17.1474
NM_001271021	AKR1E2	0.70102	2.04228	1.73834	0.8749	2.25654	0.587657	0.0367988	0.828639	0.433155	2.59128	1.58126	1.317	1.33293	0.039105	1.24991	1.95072	1.36724	0.563751
NM_207189	BRDT	0	0	0	0	0	0	0	0	0	0	0	0	0	0.07821	0	0.0424071	0	0
NM_017935	BANK1	3.18964	3.08515	7.37973	12.1345	4.19451	3.56512	0.735977	1.93349	13.349	4.2437	2.9219	4.03332	0.457004	1.21225	2.77758	1.31462	1.67107	1.55031
NR_002453	LOC595101	28.6016	32.7199	31.7492	27.6925	40.6974	37.8843	35.3269	101.646	21.8153	18.7023	26.9502	32.8427	17.9755	16.6587	26.6647	30.5755	70.109	35.1874
NR_036444	FENDRR	6.79989	7.25661	9.61005	4.67881	3.7963	6.30752	4.41586	17.6776	3.66213	3.19216	4.95004	6.13229	5.21746	3.44124	7.82351	2.92609	5.62087	3.6174
NM_014212	HOXC11	0	0	0.0327988	0	0	0	0	0	0	0	0	0	0	0	0	0.0848141	0	0
NR_073577	USP10	20.645	27.4621	23.4183	24.2309	20.362	20.568	25.6488	17.6776	21.6577	24.7862	26.2283	21.8952	26.5443	23.9714	18.7486	26.9709	23.2431	26.6842
NM_174881	CRB3	9.49882	6.99589	6.92055	10.3466	11.0438	9.91182	5.29903	5.24805	10.7895	6.57209	6.90942	7.94317	7.99757	6.68695	8.93454	6.10662	3.4181	9.4898
NM_000715	C4BPA	2.59377	3.60658	2.09912	3.3094	1.48666	0.666011	0	1.38106	0.472533	0.225329	2.13127	0.32925	0.304669	0.62568	0.231465	1.69628	1.4432	0.469792
NM_021221	LY6G5B	2.31337	1.34704	1.67274	1.0651	1.08845	1.64544	2.09753	16.849	2.40204	1.84019	1.23751	2.05782	1.59951	1.21225	2.54611	3.13812	2.35469	3.00667
NM_001252618	LCN1	0	0	0	0	0	0	0	0	0	0	0	0	0	0	0	0	0	0
NM_001204424	RGS6	1.33194	2.52026	2.32872	1.36941	0.716783	0.27424	1.58235	3.31456	0.0787554	1.87774	1.34063	0.32925	3.19903	3.9496	0.0462929	3.30775	3.49406	0.281875
NM_001137556	FAM25B	0	0	0	0	0	0.117531	0.147195	0	0.393777	0	0	0	0	0	0.0462929	0	0	0.0939584
NM_001007533	PPP1R27	0	0	0	0	0.0265475	0	0	0	0.118133	0	0	0	0	0.039105	0	0	0	0
NM_198715	PTGER3	0.245357	0.347622	0.295189	0.646665	0.584046	1.29285	0.33119	0.276213	0.984443	0.112664	0.446878	0.987751	0.723589	0.39105	0.972152	0.381664	0.227873	1.3624
NM_003682	MADD	34.0345	31.5467	35.9475	39.9031	39.37	47.326	43.9378	58.5571	46.9776	37.1793	30.1471	33.5836	38.7311	40.9038	39.9971	33.9256	31.8263	40.2142
NM_001198868	CAPN1	107.817	97.4211	117.617	100.195	93.9252	105.426	78.7495	62.4241	138.491	55.7314	80.4381	117.666	83.8983	77.7798	100.641	59.7515	51.2715	103.871
NM_001042497	SLC12A6	42.1313	40.9759	32.9628	45.1525	25.0078	42.468	46.8449	20.716	33.3923	44.8029	42.4534	33.8305	44.4055	51.0711	34.1179	31.5509	32.9657	35.3754
NM_001256016	PSMC3IP	11.6019	11.7757	12.5619	12.629	18.1054	17.2379	10.2301	12.982	13.3884	10.1398	10.5188	19.6727	11.2728	10.9494	16.7118	9.20233	8.65918	16.5837
NM_014308	PIK3R5	4.34632	3.9542	7.21574	5.89607	3.29189	3.52594	1.83994	1.38106	6.26106	2.10307	3.36877	4.19794	2.39927	1.25136	2.91646	1.7811	2.50661	3.8523
NM_001267723	CCDC61	2.76903	1.30358	2.16472	1.71176	1.43357	1.48873	1.76634	3.59077	1.45698	1.65241	1.71876	1.6051	1.82802	1.01673	1.20362	1.8235	2.12682	0.61073
NR_024217	SNAR-C2	0	0	0	0	0	0	0	0	0	0	0	0	0	0	0	0	0	0
NM_001243535	ANKRD65	0.70102	0.217264	1.04956	0.532548	0.504403	0.979429	0.257592	0	0.708799	0.225329	0.412503	0.452719	0.609338	0.31284	1.15732	0.508885	0.0759577	0.516771
NM_001145083	ZNF619	3.5752	2.47681	3.80466	3.99411	4.11487	2.42898	3.0175	5.80047	2.79582	5.67078	4.46878	3.2925	3.00861	4.26244	2.96275	3.22294	3.64597	2.20802
NM_018653	GPRC5C	23.2739	17.6853	12.8571	23.3941	13.8578	26.9539	20.0186	14.6393	23.1147	14.4211	19.8345	17.4914	8.91157	14.3906	16.0637	8.09975	9.19089	13.9998
NM_004698	PRPF3	16.5791	17.2942	18.3673	14.8733	31.5385	16.5328	20.5706	36.4601	17.3656	24.5609	19.2845	17.7384	19.0418	23.6585	24.7204	22.1365	17.3943	20.5769
NM_014701	SECISBP2L	31.7211	30.33	23.5167	27.236	27.3174	35.6904	33.5973	29.831	34.298	32.5976	24.8877	33.5012	31.2286	29.6807	37.3121	31.4236	28.1044	34.3418
NM_012243	SLC35A3	48.1601	51.9695	30.8965	61.1669	34.3525	108.325	74.9592	63.8052	80.6456	103.726	81.0568	116.431	86.6784	85.4444	106.659	94.5677	84.6169	134.032
NM_001184971	PACSIN2	43.5333	39.542	42.2777	38.914	50.0952	95.7881	49.8256	33.9742	111.439	32.9356	36.5409	120.423	34.123	40.9038	113.742	31.8053	30.8388	93.7705
NM_001256547	TMEM126B	10.9009	14.1221	8.1997	11.64	18.3709	8.26638	11.1132	4.41941	9.56879	15.097	14.5407	11.853	21.1745	16.9716	16.0637	15.1817	9.41876	16.3488
NM_052997	ANKRD30A	0	0	0	0	0	0.117531	0	0	0.0787554	0	0.0343752	0	0	0.07821	0	0	0	0
NM_001252129	LSM4	27.7253	32.6765	27.7806	27.6925	48.7147	24.5249	27.6359	17.6776	35.0855	20.6927	29.1158	39.9628	26.5443	26.5132	26.5721	30.4059	21.648	22.9259
NM_199160	LHX6	0.455663	0.47798	0.655976	1.17921	0.292023	0.705189	0.294391	0.552426	0.51191	0.187774	0.309377	1.19353	0.114251	0.508365	0.972152	0.339256	0.379789	0.422813
NM_001164539	DISC1	1.54224	0.651791	2.03353	1.36941	0.982259	1.13614	1.10397	2.76213	0.433155	2.14063	0.790631	0.905439	0.609338	1.25136	1.57396	0.763327	1.13937	1.03354
NM_001243212	LOC643669	0.070102	0.130358	0.131195	0.228235	0.159285	0.0783543	0.0735977	0.828639	0.0393777	0.0375548	0.103126	0	0	0	0	0.169628	0.531704	0
NM_019111	HLA-DRA	377.184	250.114	378.433	700.186	221.38	221.155	143.736	18.2301	288.521	186.91	188.583	169.811	153.439	128.225	199.893	95.6279	56.5126	168.984
NM_019024	HEATR5B	29.6531	30.3735	28.6662	34.5395	25.8042	39.4906	35.2901	61.5955	32.4079	36.8413	31.6252	30.4968	36.7888	39.3396	28.9331	29.6849	23.8507	37.3015
NR_039618	MIR4422	0	0	0	0	0	0	0	0	0	0	0	0	0	0	0	0	0	0
NM_181846	ZSCAN22	7.11535	5.43159	7.05174	10.4988	12.7163	6.50341	6.14541	8.83882	5.4735	4.95724	6.70317	5.76188	7.80715	6.76516	4.62929	8.60863	8.43131	6.15428
NM_032597	MS4A14	0.245357	0.130358	0.426385	0.45647	0.10619	0.54848	0.294391	0	0.433155	0.0751097	0.0343752	0.246938	0.190418	0.23463	0.416636	0.508885	0.455746	0.61073
NM_002612	PDK4	13.1792	10.6025	11.1188	10.5749	2.54856	22.4877	10.0093	4.69562	34.9674	17.3128	10.0376	32.0608	15.3477	14.4297	26.1092	11.5347	13.0647	29.0332
NM_001206744	TPO	0.070102	0	0.26239	0.0760783	0.132738	0	0.147195	0.828639	0.0393777	0.225329	0	0.658501	0.152335	0.07821	0.185172	0.296849	0.0759577	0.0469792
NR_003686	SNORD125	0.035051	0	0.0327988	0.0380391	0.10619	0	0	0	0	0	0	0	0.0380837	0	0	0.0424071	0	0
NM_000902	MME	2.69893	5.77922	2.13192	6.96116	1.27428	1.84133	3.34869	11.0485	4.37093	6.2341	4.88128	3.41597	1.48526	2.42451	6.66618	2.50202	6.91215	4.69792
NR_027292	SSR4P1	0.105153	0.0869055	0.131195	0	0.398213	0.0391771	0.220793	0	0.236266	0	0.137501	0.246938	0.152335	0.23463	0.138879	0	0	0
NM_006123	IDS	13.3544	9.25544	13.7755	14.7592	8.38902	16.7286	14.7931	10.4961	14.3335	9.12582	8.35318	12.4704	11.1966	12.3572	12.962	8.94789	8.20344	12.0737
NM_014940	MON1B	44.69	42.9748	53.1997	47.625	36.0516	59.0791	42.3187	25.6878	63.91	34.8884	40.4253	52.6389	34.161	38.5966	44.7653	30.1514	28.2563	45.8987
NM_001009909	LUZP2	1.61235	0.825602	2.19752	1.52157	0.159285	1.01861	0.699178	9.11503	1.02382	2.77906	4.67503	4.40373	2.70394	0.70389	2.45353	1.01777	0.379789	4.36907
NM_001130063	GRM2	0	0	0.426385	0	0.0530951	0.156709	0	0.276213	0	0	0.0687505	0.0411563	0	0.07821	0	0.0848141	0	0.0939584
NM_138272	C6orf25	0.245357	0.260717	0.163994	0.190196	0.371665	0.470126	0.404787	1.65728	0.393777	0.262884	0.378128	0.123469	0.609338	0.351945	0.462929	0.593699	0.151915	0.234896
NM_206900	RTN2	1.33194	0.564886	2.03353	1.36941	3.02642	0.666011	1.25116	2.48592	0.472533	3.56771	1.92501	0.288094	1.48526	2.03346	0.231465	0.296849	0.835535	0.798647
NM_017709	FAM46C	65.1948	64.4839	78.3892	51.2387	27.9015	83.604	60.4605	11.6009	97.5386	61.0266	76.7599	110.71	30.5812	11.6142	95.1783	55.0868	46.2583	95.4148
NM_001077196	PDE11A	3.18964	2.04228	3.01749	3.38548	0.663688	1.76297	1.43515	2.2097	3.26835	0.788651	1.47814	1.23469	1.25676	1.01673	1.3425	1.31462	1.06341	1.59729
NM_025204	TRABD	28.3562	25.2895	29.4861	26.4752	35.0693	17.4338	20.9017	24.3067	25.5168	19.0027	17.2907	23.8295	20.3367	20.8821	15.3693	12.3829	16.9386	13.7649
NR_026793	LINC00264	0	0	0	0.0760783	0	0.0391771	0	0	0	0	0	0	0	0	0	0.0424071	0	0
NM_201612	IKBIP	2.76903	2.47681	2.6239	3.3094	2.62821	1.3712	1.61915	0.276213	1.73262	2.14063	2.50939	2.05782	2.62777	1.95525	2.17577	2.54442	2.81044	1.78521
NM_004815	ARHGAP29	4.27622	6.21374	3.67347	10.5749	21.3973	2.42898	4.01107	13.5344	4.21342	9.76426	3.40315	2.71632	10.016	6.17859	3.65714	8.65104	4.55746	3.10063
NM_014253	TENM1	0.175255	0.391075	0.196793	0.798822	0.265475	1.52791	0.294391	0	1.81138	0.262884	0	0.576188	0.190418	0.07821	1.2962	0.169628	0.151915	0.986564
NM_004443	EPHB3	64.8794	74.6953	51.7565	36.7838	52.7765	16.8462	49.3472	42.5368	16.1842	34.5504	71.6036	28.3979	48.7471	39.5742	12.962	45.1211	41.1691	26.4493
NM_001197140	DBNDD2	21.5914	24.3335	24.6319	28.9858	28.6713	60.372	33.0454	19.3349	46.7414	22.5705	39.6347	52.8859	23.1549	21.3513	44.4875	27.0133	30.7629	40.4961
NR_028131	CFL2	2.87418	2.56371	3.50947	3.80391	5.78736	5.71986	3.2383	3.59077	5.63101	5.29523	5.36254	4.81529	3.9607	4.10602	6.34213	5.17366	3.03831	6.53011
NM_172194	OR4Q3	0	0	0	0	0	0	0	0	0	0	0	0	0	0	0	0	0	0
NM_016505	ZCCHC17	10.0947	9.64651	10.7908	8.48273	16.5126	9.63758	11.8492	3.03834	10.6714	11.6796	10.1751	8.76629	12.5295	12.9046	11.3418	13.3582	11.3177	9.91262
NM_006398	UBD	58.3949	43.4962	38.145	28.9478	9.90223	8.07049	10.0093	17.6776	12.089	25.8753	13.9907	2.75747	4.68429	7.97742	5.09222	5.89458	3.79789	0.798647
NR_033932	FLJ35946	1.57729	2.65062	1.67274	0.836861	1.00881	2.19392	3.38549	7.73396	1.14195	3.26727	3.78128	3.53944	3.84645	2.50272	1.71284	1.61147	3.64597	2.72479
NM_017554	PARP14	151.385	145.132	109.056	156.949	196.717	97.5119	91.0403	75.4061	70.2892	75.4101	89.3413	77.2504	56.897	77.4279	87.4937	76.5447	84.541	89.1666
NM_001270979	IST1	62.6011	71.0018	57.4635	54.6622	41.5734	72.9478	60.4605	39.7747	78.7161	57.6842	58.1629	63.5042	48.9756	52.9482	68.0043	42.8735	35.4723	63.7038
NM_001256321	THTPA	5.2226	4.86671	5.83819	6.58077	3.63701	6.89518	5.96141	9.66745	3.89839	3.45504	6.11879	6.5027	6.2838	5.67022	4.39783	4.53756	3.72193	3.6174
NM_182913	SYNE2	24.9563	25.9847	26.3702	20.9215	19.0877	28.8736	30.3222	33.1456	17.405	25.6875	28.119	25.805	23.6119	22.4463	22.128	31.254	22.1037	31.0533
NM_020764	CASKIN1	13.2843	15.4257	13.1851	11.4878	10.1677	12.9285	14.0204	9.94367	13.2703	7.43586	12.7876	14.6928	12.4534	10.7539	10.9714	8.56623	10.1024	10.8052
NM_001174168	SYK	73.6772	57.3576	76.9788	64.8948	104.942	43.2124	61.4541	31.4883	58.5547	66.4345	73.4943	55.6433	58.3061	65.3053	50.5519	50.0827	39.3461	47.8248
NM_031300	MXD3	2.38347	2.08573	3.73906	2.96705	3.34499	2.50734	1.54555	2.2097	2.1264	1.61486	2.71564	1.89319	2.39927	2.3854	2.36094	1.69628	2.73448	1.31542
NM_001130404	PRR20B	0	0	0	0	0	0	0	0	0	0	0	0	0	0	0	0	0	0
NM_007193	ANXA10	0	0.0434528	0	0.266274	0.132738	0.117531	0	0	0.118133	0	0.0687505	0.205782	0.0761673	0.273735	0.185172	0.169628	0.303831	0.0939584
NM_021871	FGA	0.35051	0	0	0	0	0	0	0	0	0	0.343752	0	0	0	0	0.0848141	0.607662	0
NM_000848	GSTM2	6.62464	4.95361	6.82215	8.0643	3.13261	10.3428	6.14541	13.2582	4.25279	1.53975	2.88752	5.06223	2.74202	2.50272	4.90705	3.68941	3.34214	5.30865
NM_014640	TTLL4	20.5399	23.0734	22.8608	23.6984	31.3261	16.7286	26.2744	27.0689	13.4278	22.8333	18.5626	12.8408	16.9853	16.776	12.7769	20.9915	25.8256	13.1542
NM_147128	ZNRF2	14.7565	15.9906	9.90524	10.9933	7.61914	23.9372	16.8171	26.5164	17.4837	16.5241	21.0377	22.389	18.1659	14.508	24.1649	22.9846	25.5218	29.5969
NM_004181	UCHL1	0.490714	0.564886	0.754373	2.54862	0.929164	1.21449	0.367988	0	0.708799	0.150219	0.171876	1.72857	0.342753	0.15642	0.694394	0	0	0.892605
NM_016835	MAPT	0.315459	0.130358	0.459183	1.48353	5.84046	0.352594	0.294391	0	0.472533	0.337993	0.515629	0.246938	0.0761673	0.39105	0.370344	0	0.911493	0.704688
NM_015325	KIAA0947	49.8776	52.6647	43.032	49.2607	67.006	41.136	50.5616	32.5931	39.3383	53.1401	49.5004	43.5022	51.3748	55.4509	33.1457	52.0335	53.6262	43.033
NM_006660	CLPX	23.0636	24.7681	18.9577	20.2368	26.5741	17.5905	22.3369	17.1252	19.6889	31.9967	19.9376	20.002	32.333	33.6694	23.1002	24.7233	24.6103	24.5232
NR_031571	MIR1185-2	0	0	0	0	0	0	0	0	0	0	0	0	0	0	0	0	0	0
NM_001033930	UBA52	183.948	144.958	164.092	211.574	238.53	97.6686	121.326	76.511	138.098	212.222	160.086	119.353	203.748	210.58	147.073	282.431	325.175	129.757
NM_033035	TSLP	0.841224	0.521433	0.327988	0.41843	0.0796426	0.117531	0.367988	0.552426	0.51191	1.08909	0.309377	0.32925	1.21868	0.430155	0.185172	0.593699	1.29128	0.0939584
NM_031964	KRTAP17-1	0	0	0	0	0	0	0	0	0	0	0	0	0	0	0	0	0	0
NM_015525	IBTK	45.6364	54.6636	38.145	34.3113	40.5115	40.9009	44.8946	46.68	73.3607	63.3174	40.9065	57.0426	60.5149	60.7691	67.5877	67.2576	67.7543	86.3948
NM_024923	NUP210	25.2367	27.7663	23.6807	22.5192	39.37	10.0685	5.00464	7.73396	21.8153	9.50137	19.7314	12.5527	6.39805	6.84337	9.30488	18.1926	21.1162	8.97303
NM_014866	SEC16A	96.6706	97.508	105.415	103.543	205.77	118.903	117.094	96.1221	136.089	79.3534	122.101	114.168	83.8221	76.6458	77.6333	73.3218	90.0099	92.4551
NM_015920	RPS27L	28.7068	37.4563	21.188	37.6587	25.8308	28.6777	25.612	22.6495	25.3199	49.0842	50.4972	41.609	62.2287	58.11	42.4506	32.0597	36.6116	34.2009
NR_033687	SLC25A1	23.8697	21.596	23.3856	23.6603	30.7951	36.5523	22.3737	16.5728	38.9839	18.3268	25.4377	32.8016	16.2998	14.9772	22.4984	17.2173	15.9511	24.0064
NM_015603	CCDC9	1.61235	1.47739	1.44315	0.989017	1.72559	2.03721	1.54555	6.3529	1.73262	2.44106	1.82189	1.52278	1.56143	0.86031	1.85172	2.54442	2.65852	1.22146
NM_030980	ISG20L2	14.7915	17.946	19.9745	20.8074	25.2467	19.7061	17.2955	19.3349	17.3656	18.2516	24.8533	17.8207	20.8318	16.1895	17.4987	17.5565	13.5205	16.4897
NM_001040006	TCERG1	47.3188	50.6659	47.0991	40.778	64.9618	29.3437	45.557	62.4241	40.3622	61.9655	54.7254	48.8114	55.8687	46.4567	44.6264	75.6542	76.4894	54.6368
NM_001252091	MRAS	3.18964	2.12919	3.37828	3.95607	2.30964	1.13614	1.25116	6.3529	3.46524	1.9153	1.85626	1.44047	1.71376	2.26809	1.2962	1.65388	1.21532	1.59729
NM_001271995	CREB3L3	0	0.0869055	0.131195	0.0760783	0.0530951	1.64544	0	0	0.826932	0.150219	0.206251	2.9221	0.0761673	0.31284	5.13852	0.254442	0.379789	2.86573
NM_003258	TK1	21.5564	25.0722	31.1589	25.8666	79.1117	12.615	13.6156	8.5626	46.5838	22.8709	27.9471	25.9696	22.0124	13.765	22.3595	21.7548	19.1413	15.879
NM_000811	GABRA6	0	0	0	0	0	0	0	0	0	0	0	0	0	0	0	0	0	0
NM_001181	ASGR2	0.175255	0	0.163994	0.266274	0	0.0391771	0.147195	0.552426	0.118133	0	0.0687505	0.0411563	0.152335	0.07821	0.185172	0	0	0
NM_001031727	MRI1	12.2678	14.2525	12.8571	13.6941	16.6453	9.16745	8.42693	22.3733	5.98541	6.91009	7.94068	5.67957	13.9386	12.7482	7.77721	12.3405	16.3309	5.54355
NM_145343	APOL1	63.232	34.2408	40.3753	86.2728	71.1739	21.4299	19.1354	28.7261	15.2392	15.6228	11.5845	8.84861	13.2912	22.0161	16.4803	18.6591	12.9128	9.06699
NM_001712	CEACAM1	262.707	237.904	238.644	522.353	333.198	525.601	106.312	158.822	1304.7	195.736	281.843	1327.99	158.961	201.977	1006.04	216.7	126.773	873.25
NM_001084393	DDTL	63.1619	51.535	58.9395	50.2877	28.22	56.6501	37.7924	27.8975	55.9164	26.8517	60.4317	105.978	31.9141	27.4908	50.3667	17.7262	20.4326	29.1271
NM_005539	INPP5A	8.44729	5.30124	7.41253	9.01527	8.6545	14.5739	11.7388	11.8772	13.034	7.09786	11.172	13.6639	7.31206	8.6031	11.7121	10.2201	10.862	12.6374
NM_001005566	OR5B2	0	0.0869055	0	0	0	0	0	0	0	0	0	0	0	0	0	0	0	0
NM_172060	EYA1	0.070102	0.0869055	0.26239	0.0760783	0.185833	0.666011	0.294391	1.38106	0.236266	0.0375548	0.275002	0.32925	0.0380837	0.31284	0	0.0424071	0	0.0939584
NM_001986	ETV4	10.5854	9.60306	3.93586	13.8462	16.7515	0.391771	9.78849	22.6495	0.787554	17.9512	10.9313	0.535032	9.59708	14.9381	0.324051	9.71122	15.0396	0.187917
NM_033302	ADRA1A	0.035051	0.0869055	0.459183	0.152157	0.0796426	0.0783543	0	0	0.0787554	0	0	0	0.0761673	0.07821	0	0	0	0
NR_026751	ZNRD1-AS1	0.630918	0.608339	0.590379	0.989017	0.424761	0.27424	1.28796	0	0.354399	0.488213	1.06563	0.576188	0.571255	0.54747	0.370344	0.805734	0.607662	0.704688
NM_005434	MALL	49.0013	53.6642	59.9562	136.865	143.038	376.845	43.7538	32.8693	406.89	3.75548	45.7191	430.783	23.1929	25.0272	194.986	18.5319	7.21598	164.615
NM_145250	RNASE11	0	0	0	0	0	0	0	0	0	0	0	0	0	0	0	0	0	0
NM_020442	VARS2	4.24117	4.82326	5.4774	2.20627	2.97332	4.77961	3.42229	9.94367	2.63831	4.80702	3.0594	3.04557	3.7322	2.85466	2.03689	3.35016	4.55746	2.255
NM_001199951	LYZL6	0	0	0	0	0	0	0	0	0	0	0	0	0	0	0	0.0424071	0	0
NR_102267	MGRN1	53.8734	44.1045	53.954	55.1567	36.8745	49.0106	48.2433	52.7567	47.9621	27.7155	36.6784	47.4532	33.6659	35.3509	38.9324	26.9709	32.8137	36.9257
NM_001170723	TEX35	0	0	0	0	0.0265475	0	0	0	0	0	0.0343752	0	0	0	0	0	0	0
NM_000339	SLC12A3	0	0.0869055	0.131195	0.0760783	0.10619	0.0391771	0.0735977	0	0.0787554	0.0375548	0	0.123469	0	0	0.138879	0.169628	0	0.281875
NM_001146226	KRT72	0	0	0.163994	0	0	0.0783543	0	0	0	0	0	0.0823126	0	0	0	0	0	0
NM_013354	CNOT7	16.7544	19.2061	16.2354	18.1447	17.6276	18.0215	19.6874	7.73396	13.7034	33.3862	17.7033	14.2812	27.6106	23.2284	18.1005	38.8449	26.889	16.9125
NM_006945	SPRR2D	0	0	0	0	1.40702	0	0	0	0	0	0	0	0	0	0	0	0	0
NM_019008	SMCR7L	39.9581	38.7164	45.0656	35.3003	56.387	39.6081	41.6563	27.3451	49.6159	35.3015	39.0503	43.2964	31.7618	29.5243	37.2195	32.187	29.5476	35.4223
NM_177937	GOLM1	428.533	430.53	406.968	467.805	302.27	742.877	547.162	204.398	824.845	250.303	295.318	777.237	305.736	342.599	868.872	271.575	132.698	694.964
NR_045012	LMO3	1.26184	0.651791	0.951165	0.532548	0.424761	0.783543	0.551983	6.3529	0.393777	1.76508	1.10001	1.72857	0.83784	0.54747	1.71284	1.99313	2.58256	2.20802
NM_024581	FAM184A	0.385561	0.0869055	0.327988	0.41843	0.265475	1.72379	0.0735977	0.276213	1.53573	0.450658	0.240627	1.81088	0.228502	0.23463	1.62025	0.296849	0.303831	1.31542
NM_001242823	C4B_2	38.4509	30.4604	49.1982	35.5666	25.6449	19.1968	26.8264	66.0149	19.807	2.55373	24.8877	9.21901	14.7765	14.4297	6.94394	6.78513	13.9762	2.02011
NM_203399	STMN1	17.4554	28.5485	14.8251	27.236	53.4667	9.24581	19.945	19.3349	11.8133	20.3923	30.6971	18.0265	25.7826	18.8877	19.9523	27.2677	29.9273	12.4965
NM_001003803	ATP5S	4.80199	5.38814	4.72303	4.94509	4.00868	4.66208	5.22544	3.31456	4.88284	6.49699	7.11568	4.77413	8.1499	7.42995	5.74032	5.80977	6.98811	7.37574
NM_001040712	PTPRD	49.3167	52.882	39.7522	27.0078	36.317	46.5424	62.742	83.1401	38.7871	36.5033	57.8535	39.8805	58.9916	44.697	38.6083	83.966	68.7417	63.0461
NR_024137	GHRL	0.420612	0.47798	0.721574	1.02706	0.371665	0.705189	0.62558	1.10485	0.275644	0.488213	0.618754	0.164625	0.380837	0.46926	0.277758	0.551292	0.531704	0.234896
NM_001171906	NUDT16	2.83913	2.91133	2.6239	2.24431	1.24773	4.50537	1.47195	0.276213	5.19786	1.01398	2.06251	3.62176	0.952091	0.821205	2.17577	0.763327	0.835535	1.26844
NM_001130982	DYSF	2.13811	2.99824	2.6239	2.47254	2.54856	2.03721	1.28796	2.2097	2.00826	2.06552	2.57814	1.89319	1.48526	1.48599	2.26835	0.932955	1.59511	1.08052
NM_001272034	STXBP2	24.6058	18.4674	23.156	22.7474	21.5566	32.5562	18.8778	25.6878	30.0846	14.2708	15.8126	27.657	17.8993	20.2564	25.6	18.3623	14.9637	26.7782
NM_006416	SLC35A1	11.2514	15.1216	12.2668	14.3027	10.4332	18.9226	29.6967	19.6111	20.8702	26.3635	20.9001	26.0931	26.1254	25.4965	18.332	21.458	19.3692	27.5768
NM_018057	SLC6A15	0	0	0	0	0.0265475	0.156709	0	0	0	0	0	0	0	0	0.0462929	0	0	0
NR_024267	PRNT	0	0	0	0	0	0	0	0	0	0	0	0	0	0	0	0	0	0
NM_018106	ZDHHC4	12.7586	8.734	16.1698	8.55881	9.55711	7.48283	9.5309	8.83882	7.44239	13.8202	12.4782	9.17786	11.2347	13.8041	5.97179	7.71809	10.9379	6.43615
NM_001142470	C6orf203	5.2927	6.3441	4.65743	5.62979	4.51308	5.83739	5.15184	6.07669	4.4103	9.38871	6.6688	6.29692	8.72116	8.75952	7.36058	7.37883	6.53236	8.83209
NM_001271948	PPP2R2B	0.455663	0.260717	0.360787	0	0.238928	0.391771	0.0367988	0.552426	0.354399	0.0751097	0.481253	0.164625	0.495087	0.23463	0.740687	0.0848141	0.151915	0.281875
NM_024876	ADCK4	3.96076	3.2155	5.01822	4.48862	4.19451	3.72183	3.1647	6.07669	3.46524	3.64282	3.43752	4.15679	3.16094	3.44124	2.54611	4.36793	4.93725	3.00667
NM_001099756	SYBU	12.7936	12.7317	8.59329	14.7211	18.6364	21.7433	24.4344	16.2966	18.7832	17.2752	23.9595	19.4669	13.0246	18.1447	14.536	25.317	20.2807	14.3287
NM_001145964	SLC12A4	5.88857	4.6929	4.95262	6.16234	5.49534	2.42898	3.2383	7.45775	2.36266	2.96683	4.22816	1.64625	4.91279	3.67587	2.08318	3.26534	3.79789	1.97313
NM_006242	PPP1R3D	4.62673	4.56254	5.11661	5.62979	3.76975	5.64151	5.26223	3.59077	4.52844	3.86815	5.19066	4.36257	3.69411	4.65349	3.9349	6.70032	5.01321	4.18115
NR_003201	SNORD114-9	0	0	0	0	0	0	0	0	0	0	0	0	0	0	0	0	0	0
NM_000438	PAX3	0	0	0	0	0	0	0.0735977	0	0	0	0	0.0411563	0	0.039105	0	0	0	0
NR_031751	MIR2117	0	0	0	0	0	0	0	0	0	0	0	0	0	0	0	0	0	0
NM_207419	C1QTNF8	0	0	0	0	0	0	0	0	0	0	0	0	0	0	0	0	0	0
NM_001081976	ADORA3	0.140204	0.173811	0.196793	0.0760783	0.0796426	0.0783543	0.110397	0	0.315022	0.225329	0.0687505	0.452719	0.41892	0.039105	0.509222	0.0848141	0.0759577	0.704688
NR_037962	RHOU	16.7193	25.8109	15.0219	26.6274	12.9817	54.1428	23.7353	17.9538	36.3456	25.5373	22.5158	55.2318	25.935	27.8819	42.9598	27.4374	23.6988	65.4421
NM_002632	PGF	1.15668	0.651791	0.459183	0.684704	1.27428	0.235063	0.62558	2.2097	0.157511	0.112664	0.618754	0.288094	0.228502	0.31284	0.0925859	0.466478	0.987451	0.234896
NM_002144	HOXB1	0	0	0	0	0.0530951	0	0	0	0	0	0	0	0	0	0	0	0	0
NM_153323	DEFB119	0	0	0	0	0	0	0	0	0	0	0	0	0	0	0	0	0	0
NM_172004	CLECL1	0.105153	0	0.0655976	0.152157	0.0265475	0	0.0735977	0	0.354399	0.0751097	0.0687505	0	0.0761673	0	0.277758	0.127221	0.0759577	0.0469792
NR_028269	LOC100288778	8.65759	6.47446	9.67565	6.77097	6.39796	9.95099	5.85102	26.5164	6.96986	2.17818	7.01255	8.76629	3.35136	4.14513	4.16636	6.48828	8.05152	5.26167
NM_001004720	NCK2	38.6612	34.4146	37.3578	35.6046	33.2641	37.1399	37.866	25.964	29.1001	30.9076	41.2159	37.0407	35.7225	38.0883	30.5533	30.2362	28.0284	38.9928
NM_000200	HTN3	0	0	0	0	0	0	0	0	0	0	0	0	0	0	0	0	0	0
NM_021822	APOBEC3G	4.80199	3.56313	6.16618	6.01018	3.26535	2.93829	2.24473	4.41941	3.74088	1.80263	3.81565	2.34591	1.4091	2.42451	4.86076	1.99313	1.9749	2.06709
NM_000603	NOS3	8.34214	10.5156	4.23105	2.8149	3.71665	0.901074	1.65595	1.10485	2.20515	6.49699	1.34063	0.493876	9.93983	6.53053	1.9906	8.56623	6.76024	0.563751
NM_001077653	TBX20	0.876275	0.260717	1.24635	1.94	6.90236	0.0391771	1.58235	1.65728	0	0.300439	0.962507	0.0823126	2.17077	1.72062	0.0462929	0	0	0.328855
NR_102367	TM7SF2	5.57311	5.17088	6.62536	4.52666	5.54843	4.89714	5.66702	2.76213	3.62275	3.68037	4.46878	3.53944	3.80837	4.18423	4.39783	4.74959	4.48151	4.08719
NM_001268285	LRRC8E	4.62673	1.82502	1.90233	3.53764	5.84046	0.626834	5.29903	5.24805	3.34711	4.46902	3.30002	0.823126	3.42753	4.57528	1.01844	4.1983	5.16513	1.40938
NM_005149	TBX19	0.630918	0.912508	0.55758	1.17921	0.902616	1.17531	1.50875	0.828639	0.826932	1.35197	1.37501	0.823126	0.990175	0.977625	1.48137	1.06018	0.455746	1.08052
NR_039757	MIR4532	0	0	0	0	0	0	0	0	0	0	0	0	0	0	0	0	0	0
NM_001098514	C16orf89	0.806173	0.869055	1.34475	1.33137	0.0796426	1.52791	0.515184	0.552426	0.669421	0.901316	0.378128	1.27585	1.29484	0.7821	1.2962	0.551292	0	0.704688
NM_001015000	SLX1A	9.70912	13.7745	12.5947	8.67292	12.8756	12.1449	8.16934	11.6009	13.7822	0.0751097	3.67815	8.68398	7.9214	6.53053	9.90669	4.96163	5.84875	8.69116
NM_032552	DAB2IP	53.8383	51.8826	52.2485	52.9505	86.2529	90.1466	57.811	54.1377	71.825	46.4929	65.4161	81.2426	39.0357	43.9149	78.9295	30.321	33.0416	58.5361
NM_019610	RBMXL1	37.7499	31.5032	28.9285	34.7678	40.7239	20.0195	31.9046	14.0869	24.7292	34.0622	40.6315	29.4268	36.2937	42.3116	22.915	36.3853	27.8005	24.3822
NR_036188	MIR4302	0	0	0	0	0	0	0	0	0	0	0	0	0	0	0	0	0	0
NM_005157	ABL1	88.4336	80.3007	78.8811	86.1206	105.898	83.369	89.826	53.3091	57.964	55.0929	88.86	68.5664	54.0407	57.2106	51.6166	53.6873	46.2583	58.4422
NM_001531	MR1	14.6513	10.3418	17.5802	12.1725	8.0439	11.8315	22.1161	12.7058	10.5532	12.9564	19.0439	7.44929	13.5197	12.1617	5.09222	8.69345	4.40555	8.87907
NM_172197	AGER	0.525765	0.260717	0.983964	0.494509	0.265475	0.744366	0.478385	2.48592	0.472533	0.713542	0.893756	0.535032	0.457004	0.39105	0.740687	1.14499	1.06341	0.563751
NM_144707	PROM2	27.6202	26.9407	33.422	15.596	3.87594	22.6836	16.5227	15.7441	19.1769	15.5101	20.9689	27.9863	25.3256	20.2173	28.1461	19.2104	22.6354	24.2413
NM_017850	C1orf109	5.57311	7.38697	6.59256	4.79293	11.442	3.36923	6.4398	6.90532	2.36266	6.79742	7.0813	4.56835	7.31206	5.74843	3.19421	6.31865	5.01321	3.66438
NM_183079	PRNP	11.8823	9.34234	15.3498	27.5023	35.5737	13.1243	8.09574	8.28639	18.7832	13.8577	19.1126	14.8986	14.2433	8.25115	15.5544	17.1749	20.1288	15.2682
NM_001076778	FAM107A	2.73398	2.60717	4.13265	3.95607	1.16809	8.81486	3.34869	1.10485	5.98541	1.53975	1.13438	5.67957	1.59951	1.09494	5.18481	1.7811	1.06341	4.46303
NM_024513	FYCO1	45.9869	36.2831	41.5233	44.0113	43.0601	45.0145	60.0557	49.4421	32.3291	48.258	58.6442	39.8393	44.0628	49.546	29.2571	29.7698	32.6618	27.4359
NM_005663	NELFA	20.4347	19.5103	20.1713	20.427	14.9728	11.8315	17.3691	21.5446	10.3563	17.9137	15.8126	10.8241	15.5762	18.5749	9.8141	14.2488	21.7999	8.83209
NM_017563	IL17RD	2.73398	4.51909	2.09912	11.0313	16.5126	2.54651	10.8189	6.62911	0.984443	16.7495	10.0719	3.2925	7.80715	13.5303	3.33309	5.59773	10.6341	0.892605
NR_031590	MIR1179	0	0	0	0	0	0	0	0	0	0	0	0	0	0	0	0	0	0
NM_001184898	PHF8	10.8658	8.56019	11.578	9.12939	11.4951	11.0088	12.5116	14.6393	12.6009	11.304	8.31881	8.43704	9.25433	9.03325	10.8325	7.76049	9.49472	7.89251
NM_172016	TRIM39	7.39576	7.69114	6.39577	5.85803	8.17664	9.20663	9.6045	8.28639	7.99368	6.83498	7.94068	5.88535	7.57865	9.11146	6.71248	6.36106	6.53236	9.16095
NM_001206961	PLA1A	0.630918	0.695244	1.08236	0.989017	0.424761	0.783543	0.993569	0	1.02382	1.27686	0.65313	0.658501	0.761673	0.93852	0.925859	0.254442	0.303831	0.516771
NM_033082	SARNP	7.85142	7.8215	7.57652	8.55881	11.4154	5.56315	5.85102	10.4961	8.03306	13.5948	8.31881	6.83195	14.3575	12.67	14.2582	18.5319	15.0396	9.44282
NM_001647	APOD	4.24117	5.30124	12.8243	5.47764	2.46892	9.63758	39.3012	1.65728	5.27661	38.2308	12.4438	5.8442	11.4251	6.56964	8.14756	3.22294	3.72193	24.4762
NM_001040701	FUT6	16.5791	15.3823	14.2675	21.4921	15.5038	25.7394	12.4748	9.66745	19.0588	7.73629	12.547	20.2489	10.8538	9.11146	17.7765	12.3829	10.1783	15.785
NM_178469	LCN8	0	0	0	0	0.0265475	0.156709	0	0	0	0	0	0	0	0	0	0	0	0
NR_037469	MIR3689B	0	0	0	0	0	0	0	0	0	0	0	0	0	0	0	0.0424071	0	0
NM_001257135	LIF	8.7978	9.3858	10.4628	5.59175	10.0881	6.66011	7.10218	10.2199	7.00923	6.83498	5.84379	6.2146	5.90297	5.90485	4.95334	6.31865	8.73514	3.75834
NR_002601	FMO6P	0.035051	0.130358	0.0655976	0.228235	0	0.156709	0	0	0	0	0.0343752	0	0.152335	0	0	0.169628	0	0
NR_000020	SNORD33	0.630918	0.521433	0.623177	0.8749	0.451308	0.940251	0.588781	0	0.669421	0.0375548	0.825006	0.246938	0	0	0.0462929	0.169628	0	0
NR_026955	LINC00284	0	0	0	0	0	0	0	0	0	0	0	0.164625	0	0.039105	0	0	0	0.0939584
NM_001077475	NR1I3	0.420612	0.304169	0.393586	0.228235	0.371665	0.509303	0.441586	0	0.354399	0.225329	0.481253	0.370407	0.190418	0.15642	0.462929	0.254442	0.0759577	0.281875
NM_014049	ACAD9	13.2843	13.6442	11.1844	8.52077	10.9641	8.97157	12.4748	8.01018	12.5615	13.4446	13.372	10.2068	12.5676	9.58072	13.5638	15.7754	13.6724	11.322
NM_173556	CCDC83	0.070102	0.0869055	0	0	0	0	0	0.828639	0.0787554	0	0	0	0.0380837	0	0	0	0.0759577	0
NM_022807	SNRPN	8.44729	8.82091	16.629	7.64587	4.06177	9.55922	2.75991	0.552426	11.4983	4.84457	17.0501	10.2891	4.95087	9.26788	11.8973	3.30775	1.59511	9.39584
NM_001193379	UCKL1	16.3688	11.8191	13.4147	14.7211	13.3534	12.8893	12.4012	25.4116	12.8765	14.9468	13.3376	13.7462	13.215	12.1617	11.6195	17.6413	19.5211	13.1072
NM_000582	SPP1	4.76693	1.26013	1.37755	0.836861	9.82259	0.235063	3.2015	0.276213	0.905688	0	0.859381	0.205782	0.952091	1.5642	0.648101	0.254442	1.06341	2.86573
NR_034164	EXD2	23.9398	31.9378	22.5	23.6223	32.68	20.7639	29.0711	17.1252	16.6174	26.1757	27.2252	23.0887	31.3809	34.5688	19.2116	24.4265	25.0661	26.4963
NM_001166704	FAM104B	3.39995	3.9542	3.44387	4.1843	2.97332	5.36727	5.15184	6.07669	3.97715	4.91968	6.05004	7.07889	3.61795	5.35738	6.29584	3.77423	3.64597	6.71803
NM_002880	RAF1	37.8551	36.0223	40.0801	42.2995	42.3964	49.0106	42.0979	30.3834	45.5994	38.4186	41.0097	49.2641	38.0075	41.7641	56.1533	41.9406	35.0165	51.959
NM_001615	ACTG2	12.6534	10.8197	25.8455	14.6831	12.6101	18.8442	17.2587	18.5063	114.589	20.8429	17.9783	59.9236	15.1192	12.4745	149.665	18.2774	22.8633	62.1065
NR_027162	C17orf76-AS1	237.12	247.941	179.311	202.825	169.161	91.2044	173.948	130.373	87.1035	335.139	229.317	106.842	296.595	308.499	95.5949	347.992	395.436	133.562
NM_001167929	IL1RAP	4.27622	4.25837	4.26385	3.95607	6.55724	2.78158	4.48946	3.59077	3.15022	3.22972	4.05628	2.634	4.15112	4.02781	3.24051	4.91922	3.64597	3.66438
NM_001161368	SEC14L4	0	0.173811	0	0	0	0.0391771	0	0	0	0.112664	0.0343752	0	0.152335	0.15642	0	0	0	0
NR_038210	SAMD12-AS1	0.280408	0.0869055	0.360787	0.342352	0.345118	0.27424	0.33119	0.276213	0.393777	0.863761	0.550004	0.246938	0.114251	0.31284	0.277758	0.212035	0.68362	0.328855
NR_033946	LOC646268	0	0	0	0	0	0	0	0	0	0	0	0	0	0	0	0	0	0
NM_153213	ARHGEF19	3.89066	5.12743	4.19825	2.13019	2.89368	2.62487	5.33583	5.24805	2.75644	3.53015	5.12191	2.96325	4.57004	4.02781	2.22206	3.68941	4.02576	1.22146
NM_001029840	TCAIM	7.60606	8.42983	8.1997	8.0643	6.95545	6.89518	11.334	6.3529	6.96986	9.57648	13.6813	6.66732	7.50248	9.77625	7.54575	8.65104	8.27939	7.89251
NM_001146182	KRTAP16-1	0	0	0.0327988	0	0	0	0	0	0	0	0	0	0	0	0	0	0	0
NM_001242538	ZNF83	2.59377	3.51967	4.85422	3.04313	0.822974	5.21056	4.59986	5.24805	3.89839	9.01316	6.49692	5.5561	11.5013	7.42995	6.61989	2.58683	2.20277	8.17438
NM_001256064	CNTN1	0.070102	0.0869055	0.426385	0	0.0530951	0.352594	0.147195	0.276213	0.472533	0.112664	0	0.905439	0.152335	0.07821	2.45353	0.0848141	0	0.563751
NM_002559	P2RX3	0	0	0	0	0	0	0	0	0	0	0	0	0	0	0	0	0	0
NR_073468	EXTL3	11.1462	9.21198	12.1356	9.92821	20.9195	7.67872	6.18221	3.59077	7.71803	4.61924	7.18443	6.83195	5.36979	7.42995	5.2311	8.05734	11.0139	5.02678
NM_002096	GTF2F1	20.1543	16.2079	21.4504	23.4321	35.4941	18.8442	15.7867	13.8106	21.9334	19.9041	16.8439	16.586	23.9546	26.5132	23.7946	23.5359	28.788	16.2548
NM_001144961	NFKBIL1	3.75046	2.17264	3.47667	1.48353	2.1238	2.78158	2.94391	3.03834	2.44142	2.40351	1.95939	1.81088	2.97052	2.89377	1.75913	2.33239	1.13937	0.845626
NM_174921	SMIM14	44.9704	47.2766	32.6676	34.2733	13.141	80.0389	55.5662	25.4116	83.4808	38.1182	47.816	94.1245	61.6574	68.6684	98.6966	30.9572	25.2939	97.8107
NR_040053	RNF41	20.8553	18.9019	22.0408	20.0847	23.8397	13.9862	19.9082	16.849	20.3583	17.3128	22.4127	18.3557	19.4227	20.2564	17.4524	25.6987	28.5601	17.9461
NM_001159773	CANT1	89.0646	104.547	108.925	92.9296	67.5369	146.836	98.7681	41.4319	120.102	74.9594	92.7444	168.576	96.2755	80.4781	112.26	56.2742	40.5614	108.287
NM_006832	FERMT2	5.11744	5.5185	7.01895	4.52666	3.71665	3.09499	3.42229	7.18154	6.85172	3.11705	5.43129	4.48604	4.4177	3.63676	6.38843	3.47738	5.31704	4.18115
NM_001145348	KDM8	1.54224	1.69466	2.8207	1.02706	2.07071	3.17335	1.10397	6.3529	1.10258	1.27686	1.44376	1.68741	1.14251	1.48599	1.43508	1.39943	1.29128	1.50334
NR_038194	LINC00583	0	0	0	0	0	0	0	0	0	0	0	0	0	0	0	0	0	0
NM_019036	HMGCLL1	0.105153	0.0869055	0.0327988	0.190196	0.0265475	0.156709	0.110397	0.552426	0.0787554	0	0.0687505	0.0411563	0.0761673	0.117315	0.231465	0.212035	0.303831	0.0939584
NM_001190880	HYI	8.48234	6.73518	5.87099	8.02626	6.15903	12.4583	10.1565	17.9538	7.16675	8.48739	7.66568	6.2146	11.8059	12.1617	10.74	12.6797	9.3428	11.275
NM_001002261	ZFYVE27	14.1255	16.4686	20.3681	12.9333	12.2384	25.5435	15.0507	17.9538	24.7292	12.8062	9.21257	17.4914	11.5013	10.9494	19.0727	12.9766	11.9254	18.4159
NR_003139	SCARNA18	0	0	0	0	0.0796426	0	0	0	0	0	0	0.0823126	0	0	0.0925859	0.0848141	0	0.0469792
NM_001190791	ZNF317	19.1729	17.5549	20.7944	22.1768	29.1757	18.3349	18.2522	16.0204	15.2392	16.6743	21.1752	12.7996	16.5283	15.6029	12.175	27.2253	22.7114	12.3086
NM_001130407	PRR20E	0	0	0	0	0	0	0	0	0	0	0	0	0	0	0	0	0	0
NM_001146178	IP6K2	22.2574	24.9853	19.3185	27.1219	30.3438	49.2065	36.3941	73.1964	33.1954	47.92	41.6284	46.342	25.1352	23.854	43.8857	26.25	25.8256	38.0062
NM_031864	PCDHA12	0.035051	0.0869055	0.0655976	0.0380391	0	0.156709	0	0.552426	0	0	0	0	0.0380837	0.15642	0	0	0	0.0939584
NR_045529	LOC390660	0.070102	0.0434528	0.163994	0.0380391	0.0530951	0.0783543	0	1.10485	0.0393777	0.0375548	0.171876	0.164625	0.0380837	0.07821	0.138879	0	0	0.0469792
NM_001271282	DICER1	71.4339	78.5626	63.1377	84.4088	73.7225	87.9919	118.897	135.897	75.7627	96.2906	76.1068	88.1568	76.7386	83.45	81.9385	90.6663	90.6176	114.253
NM_174951	FAM9A	0	0	0	0	0	0	0	0	0	0	0	0	0	0	0	0	0	0
NM_001195248	APTX	14.0554	14.7305	17.1538	14.3027	35.4941	12.38	17.4059	12.1534	16.0661	16.0735	15.022	14.4047	17.5185	19.4743	14.0731	16.4963	15.6473	13.1072
NM_001190972	LOC100127983	0.140204	0.391075	0.0655976	0.190196	0	0.666011	0	0	0	0.112664	0.0343752	0.0823126	0	0.039105	0.416636	0.0424071	0	0.0939584
NM_001085382	PSAPL1	0	0	0	0	0	0	0	0	0	0	0	0.164625	0	0	0	0	0	0
NR_027982	RASAL2-AS1	0.630918	0.651791	0.426385	0.304313	0.530951	0.235063	0.478385	0.828639	0.590666	0.300439	0.618754	0.164625	0.266586	0	0	0.890548	0.911493	0.281875
NM_015902	UBR5	73.6071	74.6084	67.1064	66.6826	72.7668	60.8421	96.9649	117.114	67.139	111.162	95.8382	58.5654	89.4585	99.835	63.5139	136.72	152.447	72.2071
NM_174894	TRAPPC5	42.0962	29.3741	31.8148	58.0097	50.5465	27.6982	24.8392	13.2582	28.8245	24.0351	24.6471	28.2332	19.0799	23.9714	16.2025	27.0557	26.4333	13.53
NM_001184996	RNF32	1.75255	2.52026	2.49271	1.71176	1.6194	1.64544	2.75991	3.31456	1.73262	3.00439	3.50628	1.48163	3.54178	4.30155	1.66655	6.99717	9.11493	1.64427
NM_005949	MT1F	1.43709	0.78215	1.86953	33.4744	1.16809	46.5816	57.7374	39.4985	18.6257	18.5896	7.32193	24.6938	12.0725	3.67587	17.9154	10.8138	7.97556	23.6775
NM_001146284	TCF7L2	91.7985	84.4722	78.3892	103.048	78.2887	85.4453	75.916	155.232	105.65	73.645	62.4254	84.4116	81.8037	88.8465	110.594	58.8186	76.7173	117.401
NM_022978	SERF1B	5.71331	8.38638	7.21574	9.8141	9.26509	10.4603	5.51983	2.76213	2.8352	0.187774	6.6688	5.35032	5.5983	5.12275	4.67559	4.41033	3.64597	4.9798
NM_001198897	ACY1	33.6139	31.3729	20.9912	24.4211	17.8134	29.7354	22.7049	27.3451	32.2897	46.7933	26.2971	40.4978	41.6635	34.7252	47.8669	29.0488	25.3699	32.0868
NM_019101	APOM	0.806173	0.695244	1.37755	1.0651	0.398213	0.470126	1.10397	1.10485	0.630044	1.20175	1.16876	1.02891	2.3231	1.13404	0.694394	1.1874	0.835535	0.939584
NM_001358	DHX15	70.5927	80.6918	65.9584	64.2481	74.0942	59.275	78.0135	64.6338	78.3617	90.6574	69.0599	80.7487	88.2017	90.5671	109.853	92.6594	77.4769	93.3477
NR_004054	SNORD103A	0.245357	0	0.131195	0.228235	0	0.0391771	0.110397	0.552426	0.393777	0	0.0687505	0.164625	0.114251	0.039105	0.185172	0.169628	0.0759577	0
NM_018325	C9orf72	9.56892	9.42925	7.57652	7.83606	9.74295	8.26638	9.75169	11.3247	13.1522	11.9049	8.31881	7.65507	9.40666	10.793	9.8604	10.3897	11.5456	14.1407
NM_001014842	TM9SF1	22.6079	17.5115	17.7442	15.9384	21.9283	22.2918	16.9275	5.80047	29.0608	12.1302	20.2126	22.0186	14.6622	18.3793	24.7667	12.0436	10.9379	18.181
NR_031564	MIR320B1	0	0	0	0	0	0	0	0	0	0	0	0	0	0	0	0	0	0
NR_024111	SBDSP1	4.48653	4.86671	5.80539	4.1843	6.982	5.01467	6.66059	2.48592	6.81235	6.68476	4.88128	5.26801	6.77889	4.57528	5.64774	9.83844	11.7734	5.96636
NM_001270042	DYDC2	0.070102	0	0	0	0	0.0783543	0	0	0	0.112664	0.343752	0	0	0	0.185172	0	0	0
NM_001271953	TPGS2	20.9605	15.8168	13.1851	17.4219	21.1053	5.13221	10.8925	4.97183	8.58434	24.2229	14.0251	11.7707	32.5234	35.7811	14.5823	20.7371	14.1281	12.3555
NM_178471	GPR119	0	0	0.0983964	0	0	1.09696	0.110397	0	0.196889	0	0	0.617345	0	0	1.3425	0	0	0.657709
NM_133265	AMOT	26.7439	22.2913	18.8921	22.367	14.9197	15.0832	29.6231	16.5728	9.92319	21.0683	20.8658	12.1	19.7654	28.4684	11.6195	13.2734	16.9386	10.1945
NM_201589	MAFA	0	0	0	0	0.10619	1.21449	0	0	0.0787554	0	0	0	0	0	0.0925859	0.127221	0	0.375834
NM_016379	VCX3A	0	0	0.0327988	0	0	0	0	0	0	0	0	0	0	0	0	0	0	0
NM_003151	STAT4	2.03296	1.99883	3.11589	2.92901	1.77868	2.2331	1.91354	3.59077	2.24453	1.20175	0.962507	1.35816	1.90418	2.26809	1.75913	1.86591	2.20277	1.64427
NR_002944	HNRNPA1P10	169.261	188.802	129.555	144.929	182.275	66.8362	152.899	111.314	106.556	65.6458	205.598	105.319	111.776	127.678	51.1537	131.335	125.786	54.0731
NM_014364	GAPDHS	0.490714	0.695244	1.50875	0.836861	0.398213	0.901074	1.06717	1.10485	0.708799	0.375548	0.481253	0.493876	0.571255	0.7821	0.231465	0.848141	1.29128	0.234896
NR_040662	HCP5	62.9516	57.4445	67.336	67.3673	70.2182	79.6471	28.9975	31.7645	55.3651	48.6711	59.5035	63.4219	35.4178	30.6974	55.8293	10.8562	14.356	43.1739
NM_001161454	CYB561A3	23.9398	21.2049	29.3877	27.8827	18.716	32.1644	18.105	12.7058	26.3437	12.8062	14.6439	26.5458	13.4435	13.3348	18.4709	15.3938	11.1658	17.3823
NM_002135	NR4A1	24.0099	19.5103	39.293	2.70078	7.85807	54.848	3.2751	9.11503	35.0462	2.92928	4.19378	12.2646	4.95087	6.21769	13.5175	6.78513	8.65918	101.945
NM_015702	MMADHC	35.8572	41.3236	27.0262	39.0282	41.2814	37.4142	37.866	8.28639	46.5838	64.7821	44.8253	40.1686	67.2176	68.2773	59.9494	53.1785	46.5621	67.885
NM_001080512	BICC1	3.75046	3.1286	4.52624	1.02706	1.51321	1.99803	2.46552	7.18154	3.11084	0.713542	2.78439	2.46938	2.93244	3.48034	2.12948	1.01777	3.4181	4.41605
NR_034136	LOC100133461	0	0	0	0	0	0	0	0	0	0	0	0	0	0	0	0	0	0
NM_001012514	ITM2C	198.494	215.613	251.895	210.889	80.8107	934.923	235.733	151.365	754.162	161.936	202.78	804.441	180.669	140.113	713.328	108.138	72.0079	531.993
NM_001018057	DKK3	18.9626	17.7287	18.6953	9.6239	12.4242	4.34866	9.16291	46.4038	7.32426	11.3791	12.7532	6.99657	11.3489	10.5192	8.84195	5.51292	8.8111	8.3623
NM_013997	TAC1	0.105153	0.173811	0.163994	0	0.0530951	0	0.772776	0	0.0393777	0	0.0343752	0.0823126	0.190418	0.07821	0	0.0424071	0	0.0939584
NM_001177383	CPEB2	16.9296	17.6418	12.9227	11.8682	8.97307	25.3868	23.4409	27.8975	26.1074	17.3128	17.2907	25.2288	17.6327	19.0441	33.1457	18.4471	17.6982	36.6908
NR_046288	LOC100289092	0.035051	0.0434528	0.0327988	0.152157	0.398213	0.0391771	0.0367988	0	0.196889	0.0375548	0.309377	0.0823126	0.0380837	0	0.0462929	0	0.151915	0
NR_039848	MIR4699	0	0	0	0	0	0	0	0	0	0	0	0	0	0	0	0	0	0
NM_013263	BRD7	6.13392	6.99589	4.98542	5.89607	4.75201	5.44562	7.17577	6.62911	4.84346	7.28564	7.0813	6.13229	8.11182	6.49143	5.04593	7.71809	8.20344	5.8724
NM_007329	DMBT1	835.826	816.086	1470.01	476.478	50.2279	26.1312	6.99178	16.2966	23.8629	4.95724	10.622	16.0921	0.799757	1.68151	14.6286	13.9519	157.157	15.0334
NM_006581	FUT9	0	0	0	0	0	0	0	0	0	0.0751097	0	0.0411563	0	0	0	0.0848141	0	0.328855
NM_145799	SEPT6	14.5462	12.6013	18.1705	26.7035	13.4065	10.1469	12.806	6.62911	16.6568	16.2237	11.1376	10.1656	11.2728	11.7706	10.3696	6.78513	4.48151	8.03345
NM_080911	UNG	19.8739	27.0711	17.613	25.5243	33.9012	18.4524	22.1529	17.9538	16.4599	33.6116	25.4721	23.0887	24.0308	21.1167	18.7486	39.5234	31.2946	17.8051
NR_046417	OR4F13P	0	0	0	0	0	0	0	0	0	0	0	0	0	0	0	0	0	0
NR_073461	PNMT	0.105153	0.130358	0.0655976	0.0760783	0.21238	0.0783543	0	0.552426	0.0393777	0	0.0343752	0.0411563	0	0.31284	0.0925859	0.296849	0.0759577	0
NM_144595	SLAIN1	0.771122	0.825602	1.31195	2.16823	3.53082	0.783543	0.919971	0.276213	1.96889	4.2437	2.30314	2.14013	1.71376	2.65914	1.66655	3.73182	4.63342	2.34896
NM_005778	RBM5	51.7703	47.6677	54.6428	44.6579	46.5378	58.2956	64.6188	199.978	45.5994	64.031	50.3254	49.9638	56.4781	66.4785	52.2647	65.3493	96.7702	63.5629
NM_033215	PPP1R3F	1.05153	0.173811	0.491982	0.646665	0.584046	0.666011	0.33119	0	0.433155	0.375548	0.412503	0.946595	0.190418	0.508365	0.509222	0.551292	1.36724	0.234896
NM_152392	AHSA2	12.4081	12.9924	18.2033	10.5368	9.53057	17.7081	16.7067	39.4985	11.3802	17.2001	10.7595	9.63058	15.1192	16.9325	17.7302	17.5565	18.1539	17.9461
NM_001094	ASIC2	0.105153	0.173811	0.295189	0	0	0.430949	0.183994	0	0.315022	0.0751097	0.171876	0.123469	0	0	0.231465	0	0	0
NM_001747	CAPG	27.9006	21.3353	23.3856	32.4093	34.5649	18.0215	35.0325	27.0689	40.9528	47.3566	28.5658	22.3479	39.9117	47.1997	23.9797	24.172	20.4326	25.5097
NR_046752	CADM2-AS2	0	0	0	0	0	0	0	0	0	0	0	0	0	0	0	0	0	0
NM_005533	IFI35	13.2142	9.68996	9.54445	7.49371	22.0345	8.42309	7.80135	3.31456	8.6631	6.57209	7.15005	6.79079	4.72237	6.45232	7.91609	3.35016	4.63342	6.15428
NR_028291	VNN3	0.070102	0.130358	0.0327988	0	0.0265475	0.0391771	0	0	0.0393777	0	0.0343752	0	0	0	0	0	0.0759577	0
NR_033371	CDRT7	0	0	0	0	0	0	0	0	0	0	0	0	0	0	0	0	0	0
NM_018645	HES6	10.7607	12.9489	3.93586	7.03724	10.5394	5.17138	8.50053	6.62911	4.88284	4.05592	13.8532	6.83195	6.5123	8.09473	4.35154	9.66881	17.8501	5.68449
NM_004143	CITED1	0.070102	0	0.196793	0.45647	0.31857	0.156709	0	0	0.196889	0.0751097	0.103126	0	0	0	0.277758	0.0848141	0.455746	0.0939584
NR_027098	LINC00486	0	0	0	0	0	0.0391771	0	0	0	0	0.0343752	0.0411563	0	0	0	0	0	0.0939584
NM_020805	KLHL14	0.070102	0.0869055	0.26239	1.86392	0.371665	0.27424	0.0735977	0	0.905688	0.112664	0.206251	0.0823126	0.0761673	0.15642	0.0925859	0.0424071	0.151915	0.234896
NM_001243518	ESRRG	8.16688	9.08163	7.44533	3.72784	0.663688	1.01861	0.147195	0.276213	0.708799	0	0.996882	0.658501	0.571255	0.39105	0.833273	3.85904	2.73448	2.16104
NM_173477	USH1G	0	0	0	0	0	0	0	0	0	0	0	0	0	0	0	0	0	0.0939584
NM_001160183	ZNF138	2.90923	4.60599	4.69023	3.80391	3.1857	5.01467	3.86388	5.52426	4.84346	6.27166	6.5313	6.29692	6.32189	4.53618	8.19385	11.2803	10.1024	6.81199
NM_002904	NELFE	16.4039	14.1221	15.809	12.0584	19.1673	13.1635	13.2108	13.2582	15.5542	20.1669	19.147	14.9809	17.9374	19.748	19.9523	18.5319	15.1156	16.3488
NM_018015	CXorf57	0.420612	0.608339	0.655976	1.40745	0.769879	1.09696	1.43515	0	0.945065	0.638432	0.481253	0.699657	0.190418	0.195525	0.416636	0.848141	0.835535	0.845626
NM_001008491	SEPT2	254.225	282.313	216.341	234.739	303.146	194.906	296.488	158.546	277.219	283.577	267.783	253.729	304.288	301.499	247.945	266.147	210.251	266.607
NM_024687	ZBBX	0	0	0	0	0	0	0	0	0.0393777	0	0	0	0	0	0	0	0	0
NM_007320	RANBP3	20.3646	19.5972	21.516	24.7635	47.3873	19.6669	19.6506	19.0587	19.2951	18.5145	18.4939	16.6271	16.4902	17.7146	15.0452	23.1543	29.0159	14.9864
NM_002793	PSMB1	36.9437	43.1486	39.5226	35.4144	43.0601	31.3025	30.3222	17.1252	42.7642	42.5496	42.3503	43.9549	37.0173	34.4124	33.5624	33.1199	24.2305	29.1271
NM_001243598	FXYD6-FXYD2	0.210306	0.0434528	0.327988	0.684704	0.345118	0.430949	0.404787	1.10485	0.433155	0.300439	0.240627	0.370407	0.190418	0.31284	0.833273	0.0424071	0.379789	0.61073
NM_198686	RAB15	24.6759	24.0728	25.5831	12.667	12.6101	26.2095	42.2451	18.2301	22.6028	20.6176	38.3628	21.8128	27.2679	28.2338	18.4709	26.3348	38.2067	22.1272
NM_019591	ZNF26	2.83913	4.17146	2.95189	3.00509	2.92023	2.46816	3.2751	10.4961	1.89013	5.33279	3.0594	3.62176	3.19903	4.53618	2.77758	9.11752	8.8111	2.63084
NR_040040	LOC100287015	1.29689	1.52085	1.50875	0.989017	0.955711	0.940251	1.72955	2.76213	1.26009	1.46464	2.23439	1.89319	0.647422	1.44688	0.694394	1.48425	1.06341	0.751668
NM_006300	ZNF230	2.34842	2.82443	1.90233	3.38548	3.10606	2.31145	3.90068	3.59077	1.73262	3.19216	3.57503	2.46938	2.47544	2.69824	2.54611	5.17366	3.72193	2.255
NR_040008	CAPN1	108.027	97.5949	117.715	101.032	94.2968	105.269	78.8231	61.8717	138.373	55.5436	80.4037	117.872	83.327	77.6625	99.9928	59.4547	51.0436	103.542
NM_001099854	PRAMEF14	0	0	0	0	0	0	0	0	0	0	0	0	0	0	0	0	0	0
NM_017831	RNF125	7.85142	7.99531	4.91982	12.5149	7.35367	21.4299	13.3948	12.7058	24.1385	20.1669	11.3438	17.6972	12.758	10.2455	20.8781	12.6373	15.7992	20.0601
NR_046008	ZMAT1	0.841224	0.869055	1.41035	1.71176	0.451308	2.82075	3.53269	0.276213	1.53573	2.66639	1.71876	1.52278	2.24694	2.89377	2.96275	3.35016	3.11427	1.83219
NM_001040202	PAQR3	8.20193	9.51615	6.36297	7.03724	9.6633	9.20663	7.54376	6.07669	11.4195	8.82538	9.72819	10.2479	10.3207	8.29026	7.54575	11.0258	14.2041	11.5099
NM_025261	LY6G6C	0.105153	0.260717	1.01676	1.29333	1.80523	0	0.919971	0.828639	0.196889	1.95285	1.30626	0.0411563	5.36979	4.77081	1.11103	0.890548	0.835535	1.22146
NM_001031849	MASP1	0	0.0434528	0.0327988	0.228235	0.0796426	0.117531	0.220793	1.65728	1.45698	0.413103	0.171876	0.246938	0.228502	0	1.52767	0.0848141	0.151915	0.657709
NM_000834	GRIN2B	6.37928	5.38814	5.90379	5.28744	4.8582	0.861897	2.90711	4.69562	0.86631	8.29962	6.11879	1.27585	7.38823	5.90485	0.370344	5.34329	2.73448	0.422813
NR_003198	SNORD114-6	0	0	0	0	0	0.0391771	0	0	0	0	0	0	0	0	0	0	0	0
NM_000239	LYZ	872.139	1524.84	414.38	1570.29	879.52	107.306	410.049	68.777	110.809	807.617	478.022	88.2803	198.263	607.848	131.981	687.122	712.408	135.864
NM_147169	C9orf24	0.140204	0	0.0983964	0.304313	0.371665	0.470126	0.0735977	0	0.157511	0.150219	0.0343752	0.32925	0.0380837	0.15642	0.509222	0.254442	0.151915	0.187917
NM_001144942	RAB34	3.08449	1.95537	4.13265	2.39647	1.40702	1.76297	0.919971	3.86698	2.79582	1.61486	1.51251	1.81088	1.59951	1.79883	2.36094	1.2298	0.911493	2.16104
NM_000291	PGK1	130.845	144.046	126.374	108.83	217.212	117.061	98.7681	64.3576	182.91	91.3709	113.473	162.403	110.062	124.549	158.646	91.8113	64.5641	144.32
NM_014109	ATAD2	14.8967	22.3782	16.0386	17.0796	46.4847	8.2272	14.3883	18.5063	27.4463	29.2928	28.8065	18.0265	23.8023	15.3683	19.6745	52.8816	49.2966	20.4829
NM_006818	MLLT11	0.140204	0.347622	0.426385	0.190196	0.451308	0.313417	0.33119	0.276213	0.433155	0.600877	0.343752	0.78197	0.799757	0.46926	0.462929	0.254442	1.36724	0.704688
NM_001004699	OR2Z1	0	0	0	0	0	0	0	0	0	0	0	0	0	0	0	0	0	0
NR_038332	LOC100505622	0.035051	0.0434528	0.131195	0.266274	0.0796426	0.0783543	0	0	0.236266	0	0.0687505	0.164625	0	0	0	0.0848141	0.0759577	0
NM_001128613	NUDT22	16.1585	12.7317	15.8746	11.3357	13.141	15.9059	8.57413	9.11503	16.0267	7.36075	10.5188	13.8285	9.48283	9.85446	10.74	8.43901	5.08917	9.06699
NM_001135671	MSRA	4.31127	4.08456	4.95262	6.58077	1.96452	5.95493	3.79028	3.31456	5.90666	2.62884	2.47502	5.1857	3.54178	3.98871	5.2311	2.58683	1.74703	5.07376
NM_001009186	CCT6A	69.9968	83.1251	76.5852	50.9344	112.615	41.6453	65.2811	33.1456	68.0841	88.9298	72.5318	66.7967	87.402	94.7905	67.8192	129.978	113.785	65.3481
NM_001039712	DEDD	19.8389	19.7276	21.68	22.8996	16.1674	17.9823	18.1418	17.6776	18.7044	17.2377	17.1532	21.1132	21.86	20.4128	21.804	17.2597	16.7867	20.342
NM_015374	SUN2	24.8862	24.7681	31.2901	24.8776	18.8487	39.1771	17.921	26.5164	30.439	13.1817	20.6595	32.3077	22.4694	24.4797	28.7479	14.3336	15.2675	24.852
NM_015677	SH3YL1	46.0219	54.9677	39.1946	50.8964	39.8744	40.47	56.6334	28.4499	35.4399	78.7525	73.3568	45.56	51.451	60.5345	28.0998	54.3234	49.1447	33.7781
NM_018023	YEATS2	21.276	19.2496	20.0401	25.6384	32.0429	17.7864	23.2201	37.0125	17.1293	23.0211	30.4908	16.8741	25.3256	21.8597	17.1747	28.4127	26.8131	19.1675
NM_001018055	BRCC3	23.7996	23.0734	23.0576	16.2427	25.2467	24.0939	26.0168	16.2966	29.2576	29.4805	30.044	31.32	29.5529	27.3735	33.5161	28.2007	25.218	35.7042
NR_033875	FLJ12334	0.665969	0.47798	0.623177	0.684704	0.159285	0.587657	0.478385	2.2097	0.787554	0.976426	0.893756	0.32925	0.0761673	0.39105	0.416636	0.0424071	0.455746	0.140938
NM_133369	UNC5A	0.210306	0.130358	0.295189	0	0.0530951	0.352594	0	0	0.118133	0.0375548	0	0.32925	0.0761673	0	0.601808	0	0.0759577	0.0469792
NR_073394	THADA	18.7873	20.249	19.2857	19.1717	21.9283	15.5925	20.3866	38.946	19.9251	26.3635	19.0095	14.9397	21.0222	20.5301	15.5544	26.462	33.0416	17.9461
NM_032935	MT4	0	0	0	0	0	0	0.0735977	0	0	0	0.0687505	0	0	0	0	0	0	0
NM_003310	TSSC1	11.2163	10.081	9.31486	8.55881	14.4684	6.22917	8.13254	5.52426	9.09625	7.66118	9.28132	9.91867	5.97913	6.96069	6.01808	6.31865	4.40555	6.15428
NM_012202	GNG3	0.315459	0.217264	0.524781	0.798822	0.31857	0.54848	0.735977	1.38106	0.236266	0.413103	0.171876	0.452719	0.266586	0.62568	0.185172	0.593699	0.607662	0.563751
NM_001242737	LOC100506688	0.105153	0.304169	0.590379	0.45647	0.637141	0.470126	0.588781	3.03834	0.236266	0.600877	0.446878	0.246938	0.190418	0.39105	0.370344	0.169628	0	0.187917
NR_027017	PGAP2	16.474	16.7293	18.7609	15.52	14.3888	11.949	20.7913	5.80047	9.17501	14.4586	17.8408	12.7996	17.5946	14.0778	10.3233	15.6482	11.6975	10.8052
NM_201414	APP	571.296	503.053	533.735	496.791	348.967	501.938	507.162	207.712	446.031	495.423	380.534	414.979	613.413	729.816	457.097	370.002	287.044	411.961
NR_028103	DCAF8	27.2346	27.3318	29.1909	24.4972	27.2112	34.28	37.0932	44.1941	25.9893	40.3339	29.9408	26.5047	34.9608	32.8091	26.9888	26.8013	31.9782	27.3889
NR_036151	MIR3065	0	0	0	0	0	0	0	0	0	0	0	0	0	0	0	0	0	0
NM_001042529	COASY	32.5624	25.2895	34.3732	25.2199	44.3875	29.2261	23.0729	20.9922	30.9115	21.4438	23.1002	35.1475	21.403	20.6083	29.3034	21.4156	20.1288	22.3621
NM_052941	GBP4	50.193	36.1527	32.8644	31.5725	19.6186	8.07049	10.9661	13.2582	11.577	14.0831	13.0626	6.00882	8.07373	12.0443	19.7208	8.65104	16.5588	6.62407
NR_033251	XAGE1C	0	0	0	0.304313	0.159285	0	0	0	0	0	0	0	0	0	0	0.339256	0	0
NM_144618	GABPB2	11.7771	11.4715	12.4307	16.0145	12.5304	12.0666	13.1004	11.6009	11.5377	15.9608	13.5782	12.388	14.3956	15.6811	11.6195	14.0367	15.6473	13.9058
NR_029713	MIR206	0	0	0	0	0	0	0	0	0	0.0375548	0	0	0	0	0	0	0	0
NM_006483	DYRK1B	8.09678	6.17029	3.80466	10.3466	7.06164	7.79625	6.4766	6.90532	3.34711	6.2341	6.32505	2.9221	5.78871	6.37411	4.30524	7.16679	6.30449	4.04021
NR_037625	BRD2	98.9489	94.3794	102.824	101.717	110.703	105.347	97.6641	83.1401	101.555	93.4364	98.5195	93.9599	90.5248	93.6173	111.196	100.25	91.3772	110.871
NM_001242810	BRDT	0	0	0	0	0	0	0	0	0	0	0	0	0	0.07821	0	0.0424071	0	0
NM_001114974	SMTNL2	0.070102	0	0.163994	0	0.0530951	0	0.0367988	0	0.118133	0.225329	0.171876	0	0.190418	0.15642	0	0.169628	0.227873	0
NM_001199942	DOPEY1	23.344	28.2008	24.6975	21.9105	20.1496	32.3211	37.6452	44.7465	26.58	28.2788	24.0627	27.657	22.8121	24.4015	29.7664	27.1405	25.5978	30.6774
NR_026785	RHPN1-AS1	0.70102	0.217264	0.590379	0.190196	0.477856	0.195886	0.367988	0.276213	0.157511	0.187774	0.171876	0.164625	0.571255	0.508365	0.138879	0.424071	0.531704	0.0939584
NM_014042	ANAPC15	11.672	7.38697	10.0036	7.37959	7.77843	8.81486	6.99178	3.31456	11.3408	11.642	11.7907	11.853	8.87349	8.79862	15.323	10.941	9.19089	10.6173
NM_001017420	ESCO2	5.99372	6.95244	6.29737	7.64587	21.1584	2.97746	3.1279	0.828639	8.82061	9.16338	6.73755	7.90201	6.55039	4.92723	11.5269	20.2706	18.6856	7.42272
NM_007362	NCBP2	24.08	26.1151	20.4993	18.9435	46.5113	27.4632	41.6931	30.3834	22.2878	32.5225	34.4784	24.8173	27.1536	28.0774	19.906	29.0488	18.002	25.6037
NM_001166419	HDAC8	3.85561	3.82384	3.87026	3.84195	2.65475	3.44759	3.93748	4.69562	3.50462	5.0699	4.60628	3.45713	4.1892	4.61439	3.79602	4.87681	4.32959	4.36907
NM_014602	PIK3R4	17.3152	21.0746	17.4818	18.1827	15.61	19.7061	23.0729	23.2019	19.3345	22.5705	23.6502	19.0554	22.2409	21.1167	14.4434	19.7617	20.2048	22.597
NR_047616	UTY	19.944	19.0323	17.449	0.114117	0	0	31.2422	56.6237	24.2173	33.0858	27.4314	23.6649	0.0761673	0	0.185172	33.2471	37.675	37.2075
NM_004356	CD81	80.5822	67.8298	83.7354	96.8096	131.835	38.2761	33.3397	20.9922	49.6159	70.9786	73.0474	49.4287	91.0961	67.3779	41.3396	64.4587	50.4359	29.2211
NM_001271718	SPINK2	0.385561	0.391075	0.196793	0.266274	0.132738	0.0391771	0.515184	0	0.472533	1.05154	1.03126	1.27585	0.571255	0.117315	0.370344	0.212035	0.227873	1.03354
NM_001161565	TNIK	40.8695	45.495	32.438	37.0121	23.2822	18.2174	38.8228	37.565	18.4682	40.7094	35.1659	24.8584	46.9952	48.9985	25.5537	35.3251	31.0667	30.5365
NR_046693	STARD13-AS	0.771122	0.825602	1.11516	1.14117	0.477856	1.99803	1.54555	4.69562	1.37822	1.20175	1.23751	1.317	0.723589	0.54747	1.66655	2.28998	2.05086	1.1275
NM_148912	ABHD11	22.3976	19.9448	29.1253	14.7211	21.0522	21.7825	23.4777	12.982	30.2027	20.6552	20.522	27.0809	17.4042	16.3459	17.5913	18.2774	14.432	24.3822
NM_001114091	CDC27	22.3976	21.2049	17.9409	25.1819	35.6799	19.5886	21.8585	20.1635	18.3106	28.3163	25.6783	19.4669	31.1905	28.2338	27.2665	29.6425	29.0159	27.3419
NM_080679	COL11A2	1.99791	3.17205	0.426385	0.304313	0	0.352594	0.0367988	0.276213	1.0632	0.262884	0	0.32925	0.0761673	0.39105	0.370344	0.0848141	0.531704	0
NM_001257963	PDLIM3	8.7277	4.38873	8.62609	8.59684	5.28296	7.01271	7.43337	6.3529	10.1595	4.54413	3.85003	8.76629	4.95087	3.71497	11.3418	5.30088	5.16513	10.5703
NM_002661	PLCG2	6.86999	6.90899	9.28206	17.2317	5.09713	5.79822	2.64952	3.59077	12.3252	8.48739	5.36254	5.51495	4.03687	2.77645	5.13852	3.26534	3.49406	5.96636
NM_178148	SLC35B2	31.8964	35.7182	37.8826	23.9266	33.0251	28.0508	37.2404	13.5344	33.1167	29.4805	35.9221	34.7771	33.7421	29.6025	20.8781	20.5674	16.103	20.9527
NM_001242559	MAP4K4	44.7251	43.4093	42.9336	43.707	37.1135	20.0979	31.279	36.1839	33.6286	31.9216	34.0659	28.1098	44.3294	52.909	27.7295	36.1308	46.4102	32.1808
NM_017556	FBLIM1	44.3395	41.8016	45.9511	44.5438	27.2909	74.5149	49.9728	29.831	85.9222	15.4726	29.9408	77.5796	35.7986	33.8649	64.9953	23.4511	23.395	74.2272
NM_031226	CYP19A1	0.245357	0.738697	0.0655976	0.342352	0.31857	0	1.25116	1.93349	0	1.1642	0.996882	0.0823126	0.380837	0.54747	0.138879	1.90832	6.15258	0.328855
NM_001242330	USP17L27	0.490714	2.78098	1.77114	1.21725	1.64595	0.861897	0.588781	0	0.551288	0	3.23127	0.32925	0.0380837	0.07821	0.138879	0.127221	0.0759577	0
NM_001257391	CD63	200.351	187.064	179.278	158.699	138.631	251.556	184.583	98.608	373.34	234.755	178.511	341.145	229.492	251.367	404.461	241.847	176.222	365.263
NM_005732	RAD50	63.1619	78.6929	60.1858	69.003	64.0061	45.8764	63.8092	51.928	40.3228	98.3561	67.2036	52.2274	119.24	100.891	53.6535	90.4119	85.7563	73.9923
NM_003413	ZIC3	0	0	0	0	0	0	0	0	0	0	0	0	0	0.039105	0	0	0	0
NM_014620	HOXC4	1.50719	0.260717	0.951165	0.152157	0.21238	0.509303	0.0735977	0	0.236266	0	0	0.0411563	0.0380837	0.117315	0	0	0.151915	0.0469792
NM_032955	AIF1	10.0246	7.64768	10.4956	11.9443	4.32725	6.46423	4.37906	1.93349	4.09528	9.27604	4.88128	4.19794	8.56882	6.99979	9.76781	5.13125	3.9498	6.67105
NM_033262	SLC8A3	0.280408	0.173811	0.590379	0.342352	0.0530951	0.82272	0.147195	0.552426	0.236266	0.0751097	0.0687505	0.658501	0.190418	0.07821	0.416636	0	0	0.187917
NM_001242417	WDR20	16.509	13.1227	16.1042	17.8023	16.2471	21.7825	17.6634	6.07669	19.6101	13.6324	16.6376	15.9686	12.1487	13.1393	15.0452	13.6127	9.49472	20.9058
NM_033426	KIAA1737	34.7355	33.3717	25.7799	42.4897	23.6804	53.3201	37.0932	16.849	34.298	30.6823	34.6159	65.027	38.5787	37.5017	56.3848	32.9503	19.5971	60.1334
NM_001130050	DOCK9	24.6408	28.5485	27.7806	28.9478	17.4683	18.0607	26.4216	48.0611	20.0826	33.1985	24.5439	18.6027	33.0566	38.5184	23.7946	33.3319	31.9022	28.7983
NR_034122	LOC100131067	1.01648	1.69466	1.31195	1.40745	2.76094	1.44955	2.57592	4.41941	1.65386	2.40351	2.61252	1.39931	2.24694	2.81556	0.925859	3.47738	0.987451	1.45636
NM_001206789	TMPRSS13	0.736071	1.04287	1.31195	0.989017	3.07951	0.352594	0.441586	1.10485	0.118133	3.37993	2.47502	0.493876	0.380837	0.977625	0.370344	2.03554	1.74703	0.234896
NM_003114	SPAG1	23.8347	32.7199	16.1698	24.5352	44.8653	43.5258	32.6038	63.8052	23.3904	37.5548	43.2441	42.2675	44.596	40.591	36.664	44.9515	37.675	58.9589
NM_001162426	TSC1	31.5459	28.9395	25.0911	29.0999	62.3071	40.3133	33.7813	62.7003	24.1779	39.9959	39.4628	23.4591	30.7716	34.4515	26.4333	28.2431	33.0416	29.8788
NM_153696	FOLH1B	0.140204	0.0869055	0	0	0.0796426	0	0	0.276213	0	0	0.0343752	0	0.0380837	0	0	0	0	0.0469792
NM_001037872	REV1	18.6822	16.0775	17.8426	18.0305	17.2028	20.9598	21.1961	41.1557	17.1687	20.5049	18.2533	18.2734	20.0701	20.4519	22.2669	20.525	23.7748	24.1003
NM_000088	COL1A1	128.988	80.2138	121.224	67.063	76.1383	30.2839	55.9342	372.059	46.5838	51.8632	76.3474	35.024	67.0272	44.5406	44.8579	42.5767	70.8686	31.9929
NM_006463	STAMBP	19.1378	19.3365	17.7114	15.9764	18.5302	26.327	23.9928	22.9257	25.3593	18.139	21.8283	24.1999	22.5455	24.9881	34.5345	19.7617	16.255	22.4091
NM_000164	GIPR	0.385561	0.130358	0.26239	0.646665	0.451308	1.52791	0.404787	1.10485	1.10258	0.225329	0.206251	1.11122	0.228502	0.70389	2.17577	0.169628	0.227873	1.59729
NM_001129907	TMPRSS11BNL	0	0	0	0	0	0	0	0	0	0	0	0	0	0	0	0	0	0
NM_001127702	SERPINA1	341.327	223.651	194.759	193.087	65.9175	259.235	111.942	55.5188	129.041	123.217	332.374	150.961	158.923	232.088	122.352	140.198	289.779	137.367
NM_001256874	USP17L4	0	0.0434528	0.0655976	0	0.0265475	0.117531	0.0367988	1.10485	0	0	0	0	0	0	0	0.169628	0	0
NM_152586	USP54	80.3719	73.3048	60.317	79.692	84.8194	115.024	102.742	116.009	72.9275	74.9594	95.0819	60.2528	79.5948	89.4331	51.1074	85.4502	88.7946	82.1667
NM_138389	FAM114A1	31.4407	25.8544	20.9912	37.5827	17.4152	59.3142	43.3858	37.0125	69.4229	35.7898	38.4315	67.8668	35.6844	37.3062	60.0882	29.6849	23.6229	65.3951
NM_001136129	APP	553.981	491.32	520.156	483.858	339.543	489.479	496.49	202.188	434.1	485.096	371.975	405.472	603.245	715.739	448.903	361.647	279.676	404.115
NR_034180	POU5F1P4	0.175255	0.0869055	0.131195	0.0760783	0.10619	0.313417	0.220793	1.10485	0.236266	0.300439	0.481253	0.205782	0.0761673	0	0.0925859	0	0.227873	0
NM_004905	PRDX6	34.3149	44.8432	34.9963	60.9007	61.4841	147.032	62.8524	41.7082	179.602	67.6738	67.2036	268.421	63.1046	57.367	331.782	39.6506	33.2695	230.292
NR_027777	PMS2P5	0.806173	0.47798	1.14796	1.17921	0.584046	1.01861	0.735977	2.76213	0.630044	0.300439	0.962507	0.699657	0.0761673	0.195525	0.324051	0.932955	0.911493	0.798647
NM_003537	HIST1H3B	28.2861	18.5978	29.1909	17.0035	20.9195	4.30949	12.3276	9.94367	58.0034	20.2796	29.1158	22.3067	14.548	9.85446	18.2394	37.3182	34.5608	15.5031
NM_199363	TPD52L2	49.0714	49.1016	51.1661	47.0164	73.5632	49.2848	54.1311	40.3271	50.8366	44.3898	59.5723	43.2141	43.5296	46.8087	38.0065	54.069	44.891	34.9525
NR_033387	ADARB2-AS1	0	0	0	0	0	0	0	0	0	0	0	0	0	0	0	0	0	0
NR_037894	ZNF670-ZNF695	0.70102	0.347622	0.459183	0.190196	0.849521	0	0.257592	0.276213	0.236266	0.638432	0.618754	0.123469	0.495087	0.821205	0.0925859	0.551292	0.455746	0.234896
NM_006449	CDC42EP3	29.3377	26.4627	22.4672	24.4211	25.7246	24.5641	37.4244	29.831	23.351	27.3399	32.3815	18.6027	28.8674	32.5745	16.9895	21.0763	25.218	33.825
NM_030645	SH3BP5L	7.04525	6.30065	6.65816	7.34155	5.20332	9.63758	5.33583	10.2199	6.77297	5.29523	3.6094	5.5561	4.30345	3.59766	5.04593	3.56219	3.49406	2.91271
NM_001164313	ZBTB24	2.90923	2.43335	2.8207	2.73882	2.92023	1.64544	2.68632	1.93349	2.75644	3.22972	2.71564	2.14013	2.62777	2.89377	1.62025	2.71405	2.65852	2.11407
NM_001143805	BDNF	0.455663	0.304169	0.623177	0.380391	0.0530951	0.940251	0.257592	2.76213	0.433155	0.638432	0.65313	0.452719	0.495087	0.508365	0.324051	0.636106	0.303831	0.375834
NM_198155	C21orf33	30.6696	37.4997	36.3083	23.9647	20.6805	30.5582	26.7528	7.73396	19.2951	30.0814	28.5315	34.9829	27.1917	23.463	24.3038	16.0723	15.4194	23.9124
NM_014793	LCMT2	7.04525	6.69172	5.4446	4.71685	9.1058	6.03328	6.84458	3.03834	7.2455	5.89611	4.67503	5.47379	7.42631	7.23442	5.97179	2.33239	3.72193	4.13417
NM_014969	WDR47	8.09678	8.82091	6.19897	7.60783	11.8137	8.77568	8.94212	10.2199	6.49732	7.06031	6.70317	7.8197	7.76906	9.07236	8.93454	6.31865	7.21598	10.2415
NM_001007229	SPOP	31.0552	35.414	26.4358	33.8548	52.6438	37.5709	34.5909	18.7825	34.5343	33.1234	35.9565	35.1063	34.618	41.9988	36.2011	34.2225	26.1295	44.6303
NM_021130	PPIA	453.069	362.787	454.952	383.891	600.824	189.226	263.149	161.308	365.898	258.903	481.391	291.51	370.744	351.163	283.961	403.164	368.243	217.749
NM_031861	PCDHA11	0.140204	0	0	0	0.10619	0.313417	0	0	0.236266	0.0751097	0.0687505	0.246938	0.190418	0.46926	0.277758	0	0	0.0469792
NM_001206840	TGOLN2	314.653	325.635	295.944	334.136	176.355	369.48	319.451	272.622	283.559	285.604	369.534	469.347	304.593	325.236	310.811	234.765	209.188	358.451
NR_026902	MGC16142	0.245357	0.564886	0.55758	0.570587	0.849521	0.509303	0.809574	1.65728	0.157511	0.976426	0.618754	0.288094	0.685506	0.664785	0.370344	1.73869	1.21532	1.22146
NM_173541	C10orf91	0.455663	0.0869055	0.163994	0.380391	1.16809	0.0391771	0.478385	0	0.236266	0.488213	0.618754	0.164625	0.114251	0	0.462929	0.339256	0	0.0469792
NM_024768	EFCC1	1.7876	1.60775	2.95189	2.54862	1.16809	1.80215	1.58235	2.2097	0.630044	0.751097	1.34063	2.34591	1.33293	2.03346	1.38879	1.56906	2.96235	1.22146
NM_014937	INPP5F	16.3688	15.2085	13.4803	23.9266	22.1141	27.5024	25.612	21.2684	25.3986	22.7582	17.0845	27.657	19.2703	19.8653	30.9237	17.4293	16.5588	26.7312
NM_016139	CHCHD2	78.3039	76.7376	99.282	50.516	68.997	56.2584	72.6409	33.698	119.078	61.7777	73.8037	76.5507	69.3122	55.7637	65.9211	65.3917	51.7272	53.7442
NR_001291	SNORD115-1	0	0	0	0	0	0	0	0	0	0	0	0	0	0	0	0	0	0
NM_001001920	OR4C15	0	0	0	0	0	0	0	0	0	0	0	0	0	0	0	0	0	0
NM_001039569	AP1S3	2.90923	3.51967	2.95189	3.4996	9.23854	2.11557	4.59986	5.24805	5.86728	3.19216	4.05628	3.12788	6.47422	5.43559	4.21266	4.36793	10.3303	5.02678
NM_015058	VWA8	35.1912	43.0182	37.0955	35.4525	27.5829	32.948	43.4594	51.928	27.5644	50.8117	44.6878	40.0451	49.3945	50.7583	33.7013	45.1211	53.854	41.6706
NM_173526	FAM71D	0	0	0	0.0380391	0.0265475	0.0783543	0.0367988	0	0	0.0751097	0	0	0.0380837	0	0	0.296849	0	0
NR_037846	MSH5-SAPCD1	5.57311	5.99648	9.18367	5.85803	5.17677	7.91378	11.0765	41.1557	7.16675	13.2569	6.84067	7.61392	6.89314	9.4243	7.36058	13.1462	25.9775	7.79855
NM_021067	GINS1	6.72979	8.47329	6.06778	4.71685	15.3445	1.44955	2.46552	3.59077	8.3087	7.88651	9.96882	5.72073	6.01722	3.98871	5.36998	11.3651	16.103	4.04021
NM_032195	SON	130.074	128.359	165.896	156.227	132.817	139.236	139.468	97.227	142.784	130.653	141.557	155.859	134.968	120.052	127.769	140.24	114.924	153.105
NM_004686	MTMR7	2.27831	3.91075	2.52551	3.4996	2.46892	3.95689	3.1647	4.41941	2.32329	3.98081	2.50939	5.5561	3.5037	3.55855	5.2311	6.06421	8.50727	7.42272
NM_212503	CDK18	19.944	16.3382	17.4162	14.0364	8.46866	20.3721	12.7692	24.0305	9.92319	16.8246	12.5813	22.6771	14.1671	17.3235	11.2029	13.0614	17.926	12.5435
NM_000230	LEP	0	0.0434528	0.163994	0	0	0.117531	0	0.552426	0	0	0	0.0411563	0	0	0.185172	0	0.0759577	0
NM_001001662	ZNF782	3.6453	4.7798	3.11589	5.0592	2.76094	4.66208	5.74062	15.7441	2.8352	6.87253	6.73755	5.02107	4.68429	5.27917	5.18481	7.76049	12.6849	4.83886
NM_014851	KLHL21	8.55244	12.9924	11.4796	11.9443	14.5746	8.26638	8.42693	9.39124	6.10355	4.61924	7.66568	5.10338	6.16955	6.72606	3.42568	5.21607	6.68428	3.75834
NM_017640	LRRC16A	43.0777	42.1492	42.868	54.6622	42.0513	67.3455	65.3179	67.9484	60.7598	62.7166	51.3222	57.4131	54.4596	66.7913	78.9295	83.9236	81.8824	105.844
NM_173060	CAST	179.741	216.525	154.253	184.984	132.207	177.316	211.961	143.355	231.029	259.166	195.423	182.981	299.299	322.382	282.989	263.136	220.657	285.963
NM_001144033	STOML3	0.175255	0.651791	0.26239	0.114117	0	0.117531	0.147195	0.552426	0	0.150219	0.309377	0.0823126	0.41892	0	0	0.169628	0.0759577	0
NM_145733	SEPT3	0.105153	0.260717	0.360787	0.532548	0.371665	0.195886	0.367988	0	0.315022	0.0751097	0.0687505	0.370407	0.190418	0.23463	0.185172	0.169628	0	0.845626
NM_006790	MYOT	0.280408	0.173811	0.81997	0.989017	0.185833	0.861897	0.846373	0.828639	0.315022	1.12664	0.378128	0.452719	0.990175	1.01673	1.11103	0.424071	0	0.845626
NM_001257972	CTSL1	22.6079	15.5561	19.7449	15.8243	26.813	18.6875	13.91	4.41941	13.9397	15.1722	17.3595	12.0176	17.0615	14.7426	17.8228	7.76049	4.17768	17.3353
NM_206810	MOG	0	0	0	0	0	0	0	0	0	0	0	0	0	0	0	0	0	0
NM_020399	GOPC	31.9315	39.1075	40.1129	30.165	31.0075	34.4367	46.7345	39.2222	36.3063	48.8964	39.0159	34.6948	46.5001	45.7528	36.0159	45.418	57.9557	51.1604
NM_022148	CRLF2	0.070102	0	0.393586	0	0.10619	0.156709	0.0735977	0	0.157511	0	0	0	0	0.07821	0	0.0424071	0	0
NM_001025205	AP2M1	73.8875	65.8744	74.7813	47.3587	63.5283	64.6031	50.1936	36.1839	74.7389	55.0554	64.1786	58.3596	72.6255	65.0316	77.6796	56.0197	47.5495	64.4085
NM_001178124	ABI1	45.6013	50.0576	38.4074	57.0207	37.671	38.1977	50.8192	37.8412	46.6626	80.4424	52.3535	46.4243	85.5359	80.7127	66.4767	74.0427	57.576	72.395
NM_016129	COPS4	17.7709	20.9442	18.0065	17.8023	19.3797	15.3183	16.7803	6.3529	17.7987	20.7678	17.6001	19.3023	24.5259	22.8764	20.6929	19.9737	15.1156	21.4695
NM_031497	PCDHA3	0.210306	0.0434528	0.131195	0.152157	0.0265475	0.27424	0.294391	0	0.0787554	0.300439	0.171876	0.123469	0.304669	0.117315	0	0	0.151915	0
NM_001270944	KLF7	18.6822	22.8996	18.3017	23.3941	22.3265	5.60233	16.3387	34.2504	11.1833	22.5329	26.6408	5.39148	27.2679	37.5408	7.12911	17.3445	20.5845	6.06032
NM_001164753	ASPH	71.9246	65.0053	45.2296	67.1771	102.288	91.6745	91.6659	56.8999	134.79	84.4233	106.288	121.576	111.737	123.259	138.046	162.504	173.639	152.682
NM_014848	SV2B	0.105153	0.0869055	0.393586	0.836861	0.185833	0.195886	0.183994	0	0.826932	0.187774	0	0.617345	0	0	0.231465	0.254442	0	0.61073
NM_017650	PPP1R9A	36.3479	38.4991	11.906	38.9901	33.3968	30.6757	50.0832	56.6237	29.612	66.0589	35.4065	32.3077	48.0616	51.1102	38.7472	60.0908	46.5621	46.3685
NM_001042405	CEP170	15.8781	14.1221	14.5627	23.6984	26.1759	8.69733	12.4012	19.8873	11.2227	7.47341	8.73131	8.27242	13.1389	12.8264	8.56419	13.9519	15.2675	10.8522
NM_001195626	MLLT10	23.5893	22.2044	20.6305	29.2521	25.8838	21.8217	30.2486	40.3271	16.3024	31.7338	23.7189	20.4958	33.2089	34.9599	28.3776	36.3004	45.2708	34.2948
NR_047560	IKZF3	17.3502	14.1221	23.3528	53.6352	14.7604	11.0871	9.97249	9.11503	33.9436	8.75027	10.6563	8.97208	8.60691	7.8601	7.59204	15.4786	24.5343	6.24824
NM_001270377	ANKRD46	7.2205	9.55961	9.51165	7.26547	5.49534	7.83543	7.80135	9.66745	6.22168	11.9424	8.18131	8.60167	9.40666	10.5192	7.2217	16.7508	14.1281	7.89251
NM_001077268	ZFYVE19	6.86999	7.30006	7.24854	6.73293	5.52189	7.13024	6.73419	12.1534	6.5367	6.75987	4.77816	7.12004	7.50248	7.62547	8.19385	6.0218	4.78534	6.62407
NM_182577	ODF3L2	0.315459	0.0869055	0.229592	0	0.10619	0	0	1.38106	0	0.112664	0.275002	0	0.114251	0	0	0.0848141	0.455746	0
NM_004060	CCNG1	59.9021	71.8274	41.4905	67.6336	38.7859	71.6158	82.687	34.2504	62.4924	114.993	82.7412	67.2083	172.252	150.32	122.213	115.262	107.708	101.052
NM_016552	ANKMY1	2.38347	2.78098	3.31268	2.09215	2.01761	2.19392	4.23187	13.5344	1.85075	3.94326	1.85626	1.52278	2.39927	2.50272	0.833273	4.28311	6.68428	3.05365
NM_005904	SMAD7	31.1253	30.0259	27.2558	21.7584	16.5657	34.5151	35.8789	38.1174	13.034	28.2412	29.3565	28.1509	19.1942	29.6025	19.6745	19.3376	19.749	26.2614
NM_001143957	GPR63	2.41852	2.21609	2.7551	3.34744	4.00868	1.56709	3.3119	4.97183	2.00826	2.66639	2.99065	3.66291	2.3231	1.79883	4.12007	1.10258	2.20277	2.11407
NM_181897	PPP2R3A	8.55244	9.51615	6.33017	8.9392	4.64582	16.9637	4.96784	8.83882	10.1595	8.82538	9.04069	15.2278	11.5013	9.3852	22.0354	11.1531	4.86129	23.1608
NR_027358	LINC00592	0	0	0	0	0.0530951	0	0	0	0	0	0	0	0	0.07821	0.0462929	0	0	0
NM_001001994	GPM6B	0.665969	0.738697	0.951165	1.78784	0.610593	2.11557	1.83994	3.86698	0.945065	1.65241	1.27188	1.72857	0.990175	0.86031	2.12948	1.14499	1.67107	3.75834
NR_037902	LOC100507537	0	0	0	0.0380391	0	0.0783543	0	0	0	0	0	0	0	0	0	0	0	0
NM_005516	HLA-E	284.299	272.405	303.225	234.435	162.205	309.108	195.034	91.9789	218.822	137.038	194.736	188.126	155.724	168.308	163.692	81.7608	73.9069	136.146
NR_038280	LOC100506963	9.14831	8.34293	11.3156	7.98822	9.92878	13.8687	12.07	7.73396	12.3646	5.33279	8.45631	11.9353	9.36858	11.184	12.6843	8.52382	11.7734	12.3086
NM_006922	SCN3A	2.87418	2.04228	3.54227	1.29333	1.03535	1.68462	2.53912	8.5626	1.49635	2.55373	2.37189	1.19353	1.59951	1.64241	1.62025	2.03554	3.57001	1.17448
NM_001004715	OR4K17	0	0	0	0	0	0	0	0	0	0	0	0	0	0	0	0	0	0
NM_172247	CSF2RA	2.66388	2.86788	3.21428	3.76587	1.85833	1.48873	1.39836	0.552426	3.70151	0	2.13127	1.81088	1.06634	1.40778	1.71284	0.636106	0.607662	1.83219
NM_014319	LEMD3	21.8718	18.9019	21.7128	21.0356	20.0168	18.9617	20.9385	32.5931	24.4929	24.7862	20.3158	21.1132	25.6303	25.6138	25.924	37.8271	37.4472	24.6641
NM_001004351	SPDYE3	3.39995	3.51967	4.91982	3.19529	3.13261	5.52398	7.47016	41.9844	2.87457	2.55373	5.77504	4.07447	2.01843	2.15077	1.9906	4.8344	16.9386	2.20802
NM_001143758	LRRC27	2.20821	2.99824	1.86953	2.01607	1.59285	1.56709	1.25116	1.93349	0.787554	1.50219	1.54689	0.78197	1.4091	2.11167	0.648101	2.07795	1.21532	2.16104
NM_004090	DUSP3	37.6448	33.4152	36.5379	44.4297	65.5193	67.4239	39.2644	20.9922	42.5279	28.2412	37.4346	40.8682	32.5234	31.1667	37.6825	24.2144	15.4194	44.6772
NM_022145	CENPK	0.946377	2.08573	1.37755	1.25529	2.81404	0.861897	1.32476	4.14319	1.65386	7.54852	2.75002	2.05782	4.91279	2.97198	3.88861	6.6155	10.3303	2.67782
NM_001003681	HMGXB4	27.48	25.1157	22.9592	22.4811	30.742	24.5641	25.244	28.4499	28.2732	27.3399	29.2877	23.953	27.5726	27.7645	26.3407	30.9147	27.3448	27.06
NM_001143913	FAM76A	4.06591	3.25896	3.34548	3.65176	7.08819	5.9941	7.21257	1.65728	3.22897	2.89172	3.67815	5.76188	5.06513	4.45797	4.72188	5.00403	5.01321	5.35563
NR_024214	SNAR-A3	0	0	0	0	0	0	0	0	0	0	0	0	0	0	0	0	0	0
NR_026641	INTS2	13.039	16.599	11.7092	10.3466	31.9632	9.28498	12.07	15.1917	12.6009	18.9276	15.572	10.8241	17.3281	17.2062	15.1841	21.9245	19.5971	13.9528
NM_152433	KBTBD3	2.20821	2.73752	2.03353	2.73882	1.80523	2.15474	2.39192	0	1.0632	4.20614	1.99376	2.38707	2.78011	2.81556	1.85172	2.71405	1.13937	2.53688
NR_047638	UTY	26.9542	24.9419	24.2383	0.114117	0	0	40.4419	68.777	32.3685	39.5452	37.5034	30.7849	0.0761673	0	0.185172	40.3291	43.9795	45.1001
NR_030328	MIR598	0	0	0	0	0	0	0	0	0	0	0	0	0	0	0	0	0	0
NM_007127	VIL1	88.2934	108.719	89.8359	63.145	75.3154	106.013	146.275	49.4421	164.048	91.2582	122.754	172.857	91.1342	96.1592	161.238	119.673	85.1486	168.984
NM_016123	IRAK4	12.4782	11.9495	14.3331	12.5529	12.6632	12.38	13.2476	20.4398	11.4195	11.98	12.7876	10.2891	11.7298	13.1784	12.962	17.09	17.7741	12.9663
NM_001146210	SPDYE6	3.7154	3.47622	9.93804	6.61881	5.33605	10.5778	9.34691	65.4625	6.77297	0.450658	9.62507	11.1534	0.83784	1.72062	1.57396	7.37883	16.0271	1.97313
NM_005861	STUB1	29.4078	24.2032	28.8302	20.6552	16.6188	25.1125	26.532	17.6776	27.4069	19.5661	27.7752	31.7727	19.8035	18.6922	17.7765	17.0052	12.7609	18.3689
NM_002505	NFYA	33.8943	32.7634	32.4708	38.0011	39.0249	28.1684	42.3923	37.2888	37.7239	30.1941	36.2315	32.7193	33.1709	33.0828	28.8868	42.3222	37.675	34.2948
NR_026752	CROCCP2	4.97724	5.08397	6.19897	4.64077	2.7344	7.67872	6.66059	18.2301	6.5367	3.45504	3.7469	7.24351	5.90297	3.87139	7.03653	5.4281	7.59577	6.85897
NR_031670	MIR1266	0	0	0	0	0	0.0391771	0	0	0.0393777	0	0.0343752	0.0411563	0	0	0.0462929	0.0424071	0	0.0469792
NM_014009	FOXP3	2.10306	1.86847	2.45991	1.94	1.43357	0.705189	1.17756	4.14319	0.86631	1.08909	1.51251	0.0823126	0.723589	0.62568	0.416636	0.636106	1.74703	0.375834
NM_005027	PIK3R2	27.1295	23.7687	24.2055	43.2885	27.2378	29.5004	31.6102	20.1635	16.263	18.139	24.2002	22.1421	23.3834	23.5412	13.3324	30.4483	38.8904	12.3086
NR_036241	MIR4279	0	0	0	0	0	0	0	0	0	0	0	0	0	0	0	0	0	0
NR_015450	LOC285548	0	0.0869055	0	0	0.0796426	0.0783543	0.0735977	0	0	0	0	0	0.0380837	0.07821	0.0925859	0	0	0
NM_014872	ZBTB5	18.7172	16.7293	19.5481	16.2427	30.5562	17.1596	21.4905	12.1534	15.4754	17.0499	16.8439	15.5159	14.091	16.7369	12.5917	14.6304	11.6975	18.3219
NM_020940	FAM160B1	15.808	16.512	12.7259	18.4109	15.0525	16.2977	14.4619	19.0587	17.2868	17.0123	15.0907	14.5282	18.8514	18.6531	16.6655	21.1611	22.2556	19.7313
NM_152482	C19orf25	5.39785	6.21374	4.69023	8.59684	10.1677	6.66011	6.2558	5.24805	5.70977	4.43147	4.91566	5.96767	4.03687	2.89377	3.51826	5.25848	4.86129	2.95969
NM_021976	RXRB	26.7439	25.724	31.3885	23.8125	26.4679	28.8736	30.2118	28.4499	20.9096	27.1146	24.9221	22.1833	27.8772	28.9377	21.6188	20.1434	18.2299	24.0064
NR_046073	DNAJC19	6.34423	9.34234	4.23105	6.88508	5.49534	6.50341	8.31654	3.03834	5.43413	14.3084	10.5876	8.06664	11.1966	9.93267	9.30488	11.0258	9.03897	10.5703
NM_057088	KRT3	0	0	0	0	0	0	0	0	0	0	0	0	0	0	0	0	0	0
NM_001270888	SLC25A10	19.8739	17.4246	17.6458	13.618	13.3534	14.8873	13.2844	20.1635	19.5707	13.8577	16.2939	22.2656	14.7003	11.0667	10.9251	10.5594	11.7734	13.2481
NM_020353	PLSCR4	12.9689	12.6882	8.98687	11.9062	3.05297	29.422	24.6184	11.8772	12.8765	17.5381	13.7157	18.6438	14.1671	12.0052	26.5259	7.42124	6.98811	23.0668
NM_148919	PSMB8	78.4441	76.3465	79.0123	49.2987	56.7852	43.7609	28.2247	14.9155	41.8585	35.602	43.0722	48.0706	27.2298	33.0437	41.9877	20.5674	19.3692	34.4358
NM_032307	C9orf64	12.7235	13.3834	8.1669	10.9172	25.0078	5.60233	8.75812	1.10485	9.52941	7.47341	10.0032	9.34248	13.0627	9.65893	9.62893	8.69345	9.41876	8.5972
NM_006279	ST3GAL3	1.08658	0.564886	0.81997	0.989017	0.238928	0.587657	0.735977	1.38106	0.354399	0.751097	0.584379	0.617345	0.266586	0.54747	0.694394	0.805734	0.835535	0.469792
NR_003955	EMBP1	1.40204	1.39049	0.721574	0.760783	0.185833	0.470126	2.61272	1.93349	2.08702	0.187774	2.61252	0.617345	0.190418	0.039105	0.694394	0.254442	0.227873	0.516771
NM_198951	TGM2	20.61	11.8626	16.5634	7.45567	13.0614	5.83739	5.00464	17.4014	6.1823	3.37993	5.25941	7.57276	5.06513	3.67587	8.00868	2.67164	6.98811	4.46303
NM_001252197	IRX5	0	0.0869055	0.0983964	0.0760783	0.292023	0	0.919971	1.38106	0.630044	0.0375548	0.103126	0	0.457004	0.31284	0.231465	0.169628	0	0.0939584
NM_002666	PLIN1	0.455663	0.347622	0.393586	0.342352	0.10619	0.54848	0.110397	0	0.157511	0.225329	0.275002	0	0.380837	0.351945	0.185172	0.551292	0.151915	0.0939584
NM_175566	CNTN5	0.035051	0	0	0	0	0	0	0	0	0	0	0	0	0	0	0	0.0759577	0
NM_001199456	BRD2	72.9061	68.6119	74.8469	78.4747	79.2975	81.5668	71.3162	69.3295	76.1171	78.6023	78.4787	70.0069	77.1956	79.2658	92.3081	83.4147	79.3758	92.4551
NM_001146685	TMEM88B	0	0	0	0	0	0	0	0	0	0	0	0	0	0	0	0	0	0
NM_199461	NANOS1	6.34423	5.77922	6.33017	3.46156	4.32725	3.52594	7.02858	4.14319	5.23724	6.94764	6.35942	6.83195	4.72237	6.2959	3.2868	4.96163	3.79789	5.26167
NR_040061	LOC100131089	0.736071	0.347622	0.327988	0.342352	0.345118	0.587657	0.515184	1.10485	0.0393777	0.450658	0.687505	0.0823126	0.304669	0.62568	0.324051	0.339256	0.379789	0.0939584
NM_198173	GRHL3	1.22678	1.39049	1.14796	2.92901	10.6721	0.0783543	0.883172	1.65728	0.315022	0.638432	0.584379	0	4.22729	1.91614	0.0925859	3.98626	1.89894	0.0939584
NM_018009	TAPBPL	20.1543	16.8597	19.3513	19.5902	5.70772	26.0136	16.7435	18.7825	21.8153	11.7547	17.772	21.5248	14.4337	13.6476	20.9244	16.3691	11.2417	18.8387
NM_003784	SERPINB7	0.035051	0	0	5.4396	0.876069	0	0.147195	0	0.275644	0	0	0	0	0	0	0.0848141	0.151915	0.0469792
NM_002886	RAP2B	29.3026	23.7687	22.3032	33.6266	58.617	21.0381	19.1354	20.4398	32.9592	17.9888	28.394	23.706	30.3146	30.1108	27.2202	26.9709	34.3329	34.7646
NM_001178003	WDR66	1.01648	0.564886	0.459183	0.570587	0.637141	0.391771	0.257592	2.2097	0.157511	0.300439	0.309377	0	3.08478	3.63676	0.138879	0.636106	0.303831	0.375834
NM_001099921	MAGEB16	0	0	0	0	0	0	0	0	0	0	0	0	0	0	0	0	0	0
NM_001005226	OR2B3	0	0	0	0	0	0	0	0	0	0	0	0	0	0	0	0	0	0
NM_001270696	ARHGAP12	31.7562	33.111	22.828	29.4043	26.3086	39.5689	44.7474	34.8028	31.1478	51.6003	30.0783	35.4767	42.0824	50.289	41.1081	45.2907	41.7008	50.5496
NM_205838	LST1	5.53806	2.86788	6.98615	3.3094	1.64595	1.09696	1.50875	1.93349	1.85075	1.38953	2.64689	0.864283	2.78011	1.64241	1.62025	1.10258	2.43065	1.73823
NM_016407	RTFDC1	38.9416	33.2414	38.7682	31.7627	37.432	32.9088	32.6774	15.1917	43.0398	31.6587	44.9972	37.2465	32.3711	36.485	36.6177	35.113	27.1169	36.8787
NR_037180	LOC100507362	0	0	0	0	0	0	0	0	0	0	0	0	0	0	0	0	0	0
NM_031415	GSDMC	0.280408	0.0434528	0.0655976	0	0.0265475	0	0.0735977	0	0	0	0	0	0	0	0.0925859	0.0848141	0.151915	0
NR_038397	DNM3OS	0.946377	0.869055	1.01676	0.646665	0.796426	1.60626	1.06717	4.69562	1.29946	1.31442	0.618754	1.9755	1.14251	0.508365	2.54611	1.48425	1.67107	1.64427
NM_005710	PQBP1	17.876	14.5567	18.1049	14.2647	18.716	14.1038	12.99	12.982	13.1522	18.0639	11.4126	15.7629	17.6327	17.3235	16.2025	18.235	13.9003	15.3152
NM_001261427	LPIN1	23.5192	26.7234	21.0896	25.3341	52.6703	15.9451	28.1143	22.6495	20.0433	13.4822	23.3064	11.1945	16.5664	23.8931	10.5548	14.4608	21.0403	13.0132
NM_001178045	SLC44A4	215.388	174.941	234.282	200.923	84.1026	516.237	247.73	97.7794	420.869	155.289	207.867	434.323	213.954	222.234	452.421	138.374	85.6803	394.625
NM_007345	ZNF236	16.7544	17.9025	17.0226	12.7811	11.2031	15.044	12.2908	45.8514	12.7584	18.2516	13.0282	14.9397	15.2335	15.5247	14.8137	22.4333	29.8514	17.2884
NR_038992	LOC285819	0.420612	0.391075	0.426385	0.304313	0.530951	0.195886	0.846373	0.276213	0.472533	0.525768	0.343752	0.493876	0.304669	0.039105	0.601808	0.424071	0	0.375834
NM_001010863	C10orf128	0.525765	0.47798	0.426385	0.494509	0.132738	0.27424	0.257592	0.276213	0.393777	0.225329	0.378128	0.205782	0.266586	0.117315	0.324051	0.551292	0.151915	0.0939584
NM_004463	FGD1	2.24326	1.6512	4.09985	2.66274	2.25654	3.29088	3.0175	2.48592	3.38648	6.08388	4.60628	4.07447	3.12286	2.18988	2.73128	2.33239	1.36724	3.6174
NR_049745	HYDIN2	0	0	0.0327988	0.190196	0	0.235063	0	0	0	0	0	0.0823126	0.0761673	0	0	0	0	0
NM_201429	RTN3	88.5037	105.503	88.2288	123.931	107.65	94.652	90.8931	37.0125	80.173	96.5159	108.179	107.418	135.768	127.326	95.5949	103.346	67.4505	94.2873
NR_033944	LOC647323	0.035051	0.0434528	0.0327988	0	0	0.117531	0	0	0	0.0751097	0.0687505	0.0823126	0	0.07821	0	0	0	0
NM_002127	HLA-G	4.90714	6.03993	7.18294	8.40665	11.0969	34.7893	0.0735977	0	0.196889	0.563322	3.95315	17.4914	1.59951	1.75972	2.91646	0	0	0
NM_021912	GABRB3	0.35051	0.825602	1.60714	0.380391	0.132738	3.87854	0.551983	0	4.96159	17.3128	21.9314	4.07447	0.571255	0.15642	1.89801	0.508885	0	2.44292
NM_020319	ANKMY2	14.8266	19.293	14.1691	12.8953	16.2205	19.3535	24.3976	11.3247	15.9874	12.1302	13.1313	17.9442	15.2335	17.3626	18.1931	18.4471	16.5588	21.3755
NM_001198815	MUC22	0.035051	0	0	0	0	0	0	0	0	0	0	0	0	0	0	0	0	0
NM_001143761	EIF5A	68.1742	68.6988	68.6479	72.0081	107.491	54.6913	51.3712	70.9867	86.7491	66.0589	60.3629	62.6811	72.397	59.8697	58.9309	66.5791	78.3124	50.4087
NM_001198672	TMEM136	0.876275	0.955961	1.44315	1.14117	1.0619	1.13614	1.21436	3.31456	0.630044	1.84019	0.790631	0.617345	1.02826	2.22898	1.01844	0.975362	1.06341	0.469792
NM_001524	HCRT	0	0	0	0	0	0	0	0	0	0	0	0	0	0	0	0	0	0
NM_007182	RASSF1	8.7277	9.73342	8.52769	6.16234	12.6897	4.70126	6.3662	10.4961	9.17501	7.3983	5.50004	4.32141	7.23589	6.37411	4.583	9.20233	8.05152	4.18115
NM_005275	GNL1	7.2205	6.86554	10.0692	9.28155	5.49534	7.20859	9.05251	7.73396	9.13563	6.9852	6.6688	8.14895	7.80715	7.821	7.49946	5.9794	6.60832	6.90595
NM_001207074	FAM181A	0	0	0	0	0	0.0391771	0	0	0	0	0	0.0411563	0	0	0	0	0	0
NM_001136238	TMPPE	11.4617	10.6459	11.906	14.0745	12.7163	17.0029	16.4859	14.0869	16.9324	11.2664	17.497	23.2533	12.5676	7.93831	18.5635	11.7892	13.2926	17.1944
NM_001271971	HSP90AB1	556.259	535.946	499.624	447.873	800.143	218.491	500.685	206.607	417.758	567.679	535.91	335.054	624.305	688.561	348.864	572.707	501.017	332.754
NR_047575	TMEM44-AS1	0.841224	0.78215	1.11516	0.798822	0.504403	1.25367	1.06717	1.10485	0.905688	0.788651	1.47814	1.07006	0.952091	0.93852	0.694394	0.848141	0.835535	0.939584
NR_074083	TMEM231	6.02877	3.30241	4.36224	7.68391	5.01748	3.80018	6.10861	3.31456	3.78026	4.05592	4.12503	3.25135	4.87471	6.06127	2.40723	5.51292	6.38045	2.86573
NR_003304	SNORD115-12	0	0	0	0	0	0	0	0	0	0	0	0	0	0	0	0	0	0
NM_001199099	BAIAP3	2.87418	3.04169	3.90306	4.03215	3.84939	6.54258	3.79028	5.80047	4.33155	8.90049	4.09065	4.60951	4.49387	4.45797	3.88861	3.30775	1.67107	4.22813
NR_102326	HCG18	19.5585	22.5954	19.8105	17.3839	14.3622	20.4113	32.8982	36.1839	17.405	22.5705	20.3501	19.3023	18.661	20.7256	16.758	32.611	34.0291	20.7178
NR_030280	MIR554	0.035051	0	0.0655976	0.0380391	0.0530951	0.0391771	0.110397	0	0.118133	0.150219	0.0687505	0.0823126	0.0380837	0.07821	0.138879	0.127221	0.151915	0.234896
NM_001258031	SERINC4	8.06173	9.29889	10.0364	8.17841	9.02616	12.0666	14.2412	9.39124	8.34808	8.48739	10.3126	10.1245	6.89314	8.17294	12.638	7.08198	7.14003	9.9596
NM_001012751	ABI1	48.3003	52.5344	40.8017	59.5312	39.8744	40.039	53.6895	39.4985	48.4346	82.0949	54.7598	47.9883	87.8971	83.2936	68.0969	75.3998	59.4749	73.6164
NM_020961	METTL14	7.29061	8.47329	6.36297	8.10234	6.92891	8.85403	6.3294	2.76213	6.22168	9.20093	7.56255	7.44929	9.82558	10.8712	8.14756	10.5594	7.06407	9.86564
NM_020638	FGF23	0.070102	0	0.131195	0.0760783	0.398213	0	0.220793	0	0.0393777	0	0	0	0	0	0	0	0	0
NM_001100816	MED7	4.38137	6.17029	3.21428	7.91214	5.9201	6.66011	5.70382	6.3529	4.17404	5.14501	7.3563	5.1857	4.98896	4.77081	7.36058	4.07108	3.9498	5.21469
NM_002441	MSH5	4.52158	3.9542	6.88775	4.1843	3.66356	4.23113	7.28617	32.5931	3.42586	10.5529	4.81253	4.77413	5.36979	7.27353	4.81447	9.15993	21.1162	5.49657
NM_001042664	PLEKHG5	9.74417	7.47387	6.29737	5.4396	4.14142	11.6356	12.1068	29.831	6.02479	5.70833	6.63442	8.97208	5.75063	5.39649	6.20325	8.56623	13.0647	8.50324
NM_001135247	MFAP2	2.24326	1.12977	2.6239	1.10313	1.22119	0.54848	0.883172	2.48592	0.236266	0.638432	2.02814	0.946595	0.799757	1.09494	0.370344	1.14499	2.58256	0.657709
NM_001160148	DDHD1	14.6163	15.165	16.3338	20.8454	17.4152	13.6728	21.3433	31.7645	17.2081	21.2185	14.3345	13.417	15.7666	15.0945	13.7027	22.1789	32.5859	16.3957
NM_001204186	TP73	0.595867	0.434528	1.73834	1.63568	2.09726	0.391771	0.662379	0.552426	1.45698	0.713542	0.687505	0.535032	0.495087	0.23463	1.06474	0.466478	0.531704	0.516771
NR_001562	ANXA2P1	12.5483	10.9501	12.6603	13.4278	11.7871	5.60233	7.24937	9.39124	20.0039	4.09348	10.7938	9.4248	7.00739	8.48578	7.45316	7.29401	4.63342	6.9999
NM_178584	SEPT10	10.3751	13.1662	6.39577	11.9823	10.2208	15.2007	11.2972	8.01018	12.404	18.4019	14.3001	14.8574	21.8219	18.614	14.1193	15.1817	10.6341	14.9394
NM_024709	C1orf115	15.7028	19.1192	17.449	11.3357	4.00868	57.3553	20.4234	11.0485	38.157	6.27166	13.4063	38.1519	17.8612	17.7928	55.3664	13.5279	11.2417	31.1002
NM_004209	SYNGR3	0.806173	0.260717	0.491982	0.342352	0.557498	0.979429	0.0735977	1.10485	0.630044	0.413103	0.481253	0.205782	0.0761673	0.07821	0.509222	0.0848141	0.151915	0.563751
NM_014814	PSMD6	23.4842	26.3758	24.4023	19.7803	34.8835	17.6297	18.657	10.7723	25.6743	24.1853	26.3658	26.0519	25.5541	26.3959	25.2297	20.5674	18.4577	23.0198
NM_012311	KIN	4.76693	4.6929	4.00145	5.17332	4.67237	5.40645	5.74062	9.94367	4.4103	7.51097	5.56879	6.5027	5.40788	5.74843	7.03653	7.97253	8.12748	7.79855
NM_001185107	CD1E	1.19173	0.912508	2.03353	1.82588	0.822974	0.313417	1.10397	0.552426	0.630044	1.35197	1.51251	0.452719	1.56143	2.62003	1.01844	0.890548	0.227873	0.281875
NM_000504	F10	0.490714	0.260717	0.951165	1.63568	0.637141	1.25367	0.404787	0.828639	0.630044	1.12664	1.13438	0.905439	0.266586	0.117315	1.15732	0.212035	0.303831	0.422813
NM_001170585	PLB1	0.841224	0.651791	1.18076	0.798822	0.477856	1.95886	1.14076	1.93349	0.551288	1.99041	1.06563	0.78197	0.495087	0.351945	1.57396	0.551292	1.36724	1.59729
NM_001199143	XIRP2	0.070102	0.0869055	0	0	0	0	0	0	0	0	0	0	0	0	0	0	0	0
NM_198859	PRICKLE2	6.06382	6.30065	7.51093	3.61372	2.76094	11.7923	10.2301	15.4679	9.7263	4.43147	13.6813	13.17	7.76906	5.67022	12.1288	7.12439	3.9498	9.30189
NM_006751	SSFA2	85.3141	102.071	79.2419	70.03	102.447	147.776	87.8756	86.7309	216.971	86.1132	93.5007	136.392	105.568	107.891	216.281	77.3081	69.7292	210.091
NM_002357	MXD1	135.016	128.577	104.267	140.402	171.391	469.421	107.489	146.945	645.676	56.3698	84.46	499.473	70.5309	72.1878	573.292	63.7378	78.9201	824.063
NM_018071	ARHGEF40	17.7709	19.4234	16.9242	16.0145	14.3888	23.0362	19.209	24.583	12.9159	15.6604	16.3626	17.8618	6.32189	7.58637	6.11067	8.3966	8.88705	10.7582
NM_001625	AK2	32.7026	39.0206	41.2281	27.236	25.0874	30.1664	33.3765	30.3834	31.3447	35.9024	40.8034	40.6213	34.3515	36.133	38.0991	27.607	23.2431	41.1068
NR_027257	FLJ26850	0.070102	0	0	0	0	0.0783543	0	0	0	0	0	0.0823126	0	0	0.0462929	0	0	0
NM_152760	SNX32	0.245357	0.0434528	1.27915	0.41843	0.0530951	0.509303	0.0735977	0.828639	0.354399	0.150219	0.72188	0.205782	0.190418	0.07821	0.324051	0.848141	0.0759577	0.798647
NM_001261445	TXNRD1	58.9207	62.4851	45.4591	28.4913	86.8104	42.7814	33.1558	29.831	65.7214	31.0954	43.5191	63.9981	41.0542	41.5295	102.169	49.6587	44.8151	58.1133
NM_001136108	R3HCC1	7.46586	7.38697	7.60932	6.35254	7.59259	7.79625	7.80135	5.80047	5.31599	8.22451	5.91254	5.59726	7.9214	8.09473	5.2774	7.63327	7.06407	5.49657
NM_024804	ZNF669	1.6474	1.82502	0.655976	1.17921	1.32738	1.09696	1.06717	1.10485	1.26009	2.36595	1.71876	1.56394	2.58969	2.42451	1.62025	1.2298	1.59511	2.11407
NM_004159	PSMB8	76.5864	74.6518	77.8316	48.1195	55.8295	43.9568	28.1511	14.6393	41.8585	34.926	42.4191	47.3709	26.7728	32.6136	41.3396	20.2282	18.5337	33.1204
NM_001081755	ELN	3.08449	1.60775	2.39431	1.71176	1.19464	0.901074	1.39836	6.62911	1.92951	1.08909	1.54689	1.02891	1.56143	2.97198	0.833273	1.27221	1.29128	1.08052
NM_006157	NELL1	0.946377	0.0869055	0.491982	0.266274	0.185833	0	0.110397	0.552426	0	0.337993	0.343752	0.123469	0.228502	0.31284	0.185172	0.339256	0.455746	0.0939584
NM_001258015	FDXR	5.46795	5.99648	5.543	4.75489	5.04403	3.40841	2.50232	2.2097	2.1264	4.43147	4.09065	2.79863	8.11182	6.41322	1.85172	4.15589	6.68428	1.55031
NM_052968	APOA5	0	0	0	0	0	0.0783543	0	0	0	0	0	0	0	0	0.0925859	0	0	0
NM_001040105	MUC17	27.4449	11.1239	17.4818	1365.22	216.283	57.6688	25.5752	9.11503	72.4944	6.79742	4.40003	56.7957	2.3231	36.6805	57.9125	227.005	111.506	161.327
NR_073050	DEDD2	40.3086	28.6788	34.1764	39.5227	39.1842	33.2222	21.3433	13.5344	39.2202	18.1765	17.3939	25.4758	22.0124	23.8149	28.5165	21.67	17.8501	24.3352
NM_006897	HOXC9	1.15668	0	0.0655976	0.0380391	0	0	0	0	0	0	0	0	0	0	0	0	0	0
NM_001265610	TRAK1	15.4224	12.4709	14.4971	16.2807	13.38	19.0009	16.3755	28.1737	19.9251	10.6656	9.83132	14.0343	14.6622	16.5805	19.6745	8.69345	8.65918	16.0199
NR_029392	KRT16P2	0	0	0	0	0.0265475	0	0	0	0	0	0	0	0	0	0	0	0	0
NM_138451	IQCD	0.140204	0.0869055	0.131195	0.190196	0.265475	0.117531	0.367988	0.828639	0.118133	0.337993	0.240627	0.32925	0.304669	0.31284	0.370344	0.424071	0.379789	0.0939584
NR_036223	MIR4265	0	0	0	0	0	0	0	0	0.0393777	0	0	0	0	0	0	0	0	0
NM_033177	GPANK1	3.54015	3.47622	3.54227	3.23333	4.22106	4.03525	3.56949	4.41941	3.66213	3.83059	3.0594	2.38707	2.70394	2.30719	1.71284	1.7811	1.89894	2.63084
NM_001201475	C18orf21	6.9401	8.03876	6.00218	13.5039	8.15009	5.05385	6.18221	4.69562	5.1191	11.2289	6.01567	4.85644	13.7101	11.6533	7.82351	13.4854	8.27939	8.08043
NM_006622	PLK2	18.0162	12.6013	10.8236	9.66194	14.0436	10.8521	8.39014	12.1534	6.73359	8.60006	10.0376	9.75405	11.0062	13.1784	14.6749	8.86308	11.8494	13.3891
NM_018147	FAIM	3.96076	4.6929	2.6239	4.67881	3.95558	1.76297	4.04787	2.48592	2.44142	6.27166	5.08754	1.64625	6.96931	7.89921	2.17577	4.41033	3.64597	2.67782
NM_004973	JARID2	20.1543	20.4662	19.9417	20.5792	14.3888	14.8873	22.1161	29.2786	15.2786	19.3783	21.3814	15.8452	15.919	19.0441	15.7859	18.1078	19.749	17.2414
NM_024616	C3orf52	15.3874	16.6859	12.7587	7.60783	11.6278	15.1224	23.4409	17.4014	26.6193	12.0551	14.5407	18.0676	9.93983	18.7704	23.1928	7.50605	8.96301	21.1407
NM_138349	TP53I13	6.37928	9.55961	7.74052	4.71685	4.51308	7.79625	7.65416	10.4961	6.57608	4.6568	4.77816	6.33807	4.07495	4.45797	4.62929	1.69628	2.50661	2.39594
NM_018193	FANCI	15.7379	20.727	19.7449	15.4058	49.8297	10.3819	17.8842	32.0407	23.666	23.5093	20.247	16.8741	20.9079	19.8262	19.0727	25.6987	28.2563	15.4562
NM_001160301	DPYD	0.630918	0.347622	1.18076	1.17921	0.31857	1.21449	0.404787	0	1.02382	0.337993	0.240627	0.452719	0.41892	0.23463	0.972152	0.381664	0.531704	0.704688
NM_017613	DONSON	6.90504	5.82267	8.2981	6.46665	14.787	4.6229	4.85745	8.01018	8.62372	6.79742	7.66568	6.62617	9.59708	6.92158	9.07342	11.2803	8.65918	8.97303
NM_183372	NBPF11	23.4491	22.9865	25.3207	23.8886	19.6452	34.0841	31.6102	98.0556	23.5085	2.25329	29.219	26.7104	9.40666	8.91594	14.0268	12.1708	17.4703	17.6172
NM_033119	NKD1	34.2448	53.36	51.7565	17.0796	7.32712	1.48873	8.02215	21.5446	1.29946	64.6319	28.119	2.05782	24.4116	35.39	2.26835	12.2556	11.3177	1.83219
NM_001048181	OPN1MW2	0	0	0	0	0	0	0	0	0	0	0	0	0	0	0	0	0	0
NM_017743	DPP8	19.278	19.3799	19.3841	17.2317	17.0435	19.3535	24.6184	15.1917	22.8785	24.0351	21.1064	23.2122	21.6696	22.6418	25.0908	23.2391	24.9141	31.1472
NM_019602	BTNL2	0	0	0.0327988	0.0760783	0	0.0783543	0	0	0.0787554	0.0375548	0	0	0	0	0	0	0	0
NM_020228	PRDM10	8.90295	11.4715	8.56049	10.8792	10.327	11.714	9.27331	13.5344	13.8216	9.38871	9.04069	10.8241	9.44475	9.4243	13.5175	13.3582	10.862	15.1743
NM_016815	GYPC	2.80408	1.78156	4.39504	3.95607	1.48666	0.901074	1.69275	0	2.87457	1.68997	2.64689	2.01666	0.685506	0.93852	1.15732	0.466478	0.759577	1.1275
NR_028356	MRPL30	18.4719	19.8145	16.301	20.427	23.8928	14.8873	19.761	7.18154	14.8848	32.3723	23.7877	16.2156	39.5308	33.5521	27.2202	32.2294	28.2563	23.7245
NM_012147	DUX2	0.315459	0	0	0	0	0	0	0	0	0	0	0	0	0.039105	0	0	0	0
NR_073499	KHDRBS1	47.1786	51.5784	47.7551	50.8203	55.7233	34.4759	39.0068	23.7543	36.2275	43.6387	46.0972	35.9295	64.5137	61.3948	40.2286	55.0868	53.0945	38.429
NM_001267554	F7	0	0	0.0327988	0	0	0	0	0	0	0.0751097	0.378128	0.0411563	0	0.15642	0.185172	0.0848141	0	0
NM_001013842	C8orf58	1.54224	1.12977	1.70554	1.94	1.91142	1.76297	2.53912	4.97183	1.37822	1.80263	1.16876	1.72857	1.59951	1.17315	2.31465	1.39943	1.13937	2.02011
NM_152796	HIF3A	0	0.0869055	0.0983964	0.266274	0.132738	0.666011	0.257592	1.38106	0.196889	0.0751097	0.0687505	0.78197	0.380837	0.07821	0.185172	0.0424071	0.303831	0.516771
NM_001001709	C9orf170	0	0	0	0	0	0	0	0	0.0787554	0	0	0	0	0	0	0	0	0
NM_153443	KIR3DL3	0	0	0	0	0	0	0	0	0.0393777	0	0	0	0	0	0.185172	0	0	0
NM_001135768	PVR	30.0737	27.7229	29.3877	26.9697	61.8823	37.6101	28.3351	38.3936	27.0919	24.2229	28.119	33.6247	28.3723	24.949	27.174	37.7423	50.36	35.3284
NM_001032999	CBFA2T2	36.2077	33.1979	29.0269	30.6215	24.6627	40.5092	47.5441	41.9844	32.5654	33.574	49.7754	31.5669	29.0578	33.0828	30.6922	50.422	71.4762	36.3149
NR_033791	DOC2GP	0	0	0.0327988	0.0380391	0.0530951	0	0.0367988	0.552426	0	0.0375548	0.0343752	0.0411563	0.114251	0	0.0462929	0	0	0
NM_177948	ARMCX3	25.3769	26.202	19.8761	20.8454	29.7067	21.665	34.5173	13.2582	24.808	36.7286	33.4471	21.4836	27.306	30.6974	23.0076	6.86994	3.26618	26.8251
NM_170754	TENC1	17.4904	13.1662	24.2383	16.3949	8.36247	24.8383	20.313	36.1839	16.0661	13.7451	15.5032	22.5537	11.6155	12.3572	17.3136	11.9164	16.3309	14.7985
NM_001043	SLC6A2	0	0	0.0655976	0	0	0	0.0735977	0	0	0.0751097	0	0	0	0	0.0925859	0	0	0
NM_001127229	AURKAIP1	52.3311	50.4921	58.2835	55.9556	57.7143	60.4895	44.821	24.3067	63.7132	32.9731	31.419	59.8824	33.1328	30.8147	41.1081	27.3101	31.3705	37.3955
NR_037176	LOC100507463	19.8038	19.9883	24.0087	17.46	23.4415	17.7472	8.39014	7.18154	12.3646	6.75987	12.1688	12.3057	7.73098	8.87683	12.5454	4.57996	6.45641	7.4697
NM_001170793	RMDN2	1.57729	2.17264	1.96793	2.05411	0.504403	3.33006	2.75991	2.48592	2.75644	5.74589	1.40939	3.41597	3.9607	2.26809	7.96239	6.10662	3.26618	7.04688
NR_033860	LOC440970	0	0	0	0	0	0	0	0	0	0	0	0	0	0	0	0	0	0
NM_025184	EFHC2	0.280408	1.21668	0.852769	0.228235	0.0530951	0.235063	0.588781	0.828639	0.669421	0.413103	0.378128	1.02891	0.83784	0.508365	1.75913	0.593699	0.303831	1.83219
NM_001272062	MAGED4	1.9278	2.69407	2.00073	1.0651	1.64595	5.05385	1.06717	3.31456	2.04764	0.0751097	4.98441	3.00441	0.571255	0.664785	1.01844	0.551292	0.227873	1.55031
NM_001243645	CFL2	3.54015	2.95479	4.16545	4.33646	6.37141	6.62094	3.71668	3.86698	6.02479	5.70833	5.70629	5.76188	4.26537	4.49707	7.54575	5.55532	2.96235	7.28178
NR_038319	LOC100505716	0.595867	0.434528	1.11516	0.760783	0.371665	1.48873	1.50875	2.48592	0.787554	1.27686	0.65313	0.78197	0.41892	0.70389	0.601808	1.06018	1.9749	1.55031
NM_178443	FERMT3	23.4842	22.8127	23.156	17.536	8.20319	11.4005	21.0121	11.3247	10.5926	11.8298	12.9595	10.783	8.22607	12.7091	7.17541	7.67568	9.26684	8.83209
NM_003916	AP1S2	1.68245	1.39049	1.54154	1.86392	1.35392	0.940251	1.39836	0.276213	1.22071	2.51617	1.06563	1.48163	2.20885	1.29046	3.2868	1.73869	1.13937	2.02011
NM_080686	PRRC2A	118.437	98.9419	117.42	107.042	153.179	83.2122	106.017	99.7129	85.0165	103.163	107.01	83.1357	109.567	104.762	75.4575	103.6	115.532	68.6366
NM_001242525	HLA-DPA1	182.931	105.46	180.525	341.439	118.163	115.494	125.042	19.0587	198.109	139.742	116.429	137.297	103.702	78.3273	113.464	78.9195	40.1057	149.864
NM_015017	USP33	31.4407	33.4152	22.4016	31.2682	36.3967	36.2389	35.6949	41.4319	29.5333	41.7234	35.1659	32.925	37.5886	40.2781	39.2564	35.6643	33.7252	41.2947
NM_001008860	NIPA2	54.5393	69.7851	57.7915	47.9673	78.0498	57.9822	55.603	20.4398	83.0082	56.4825	69.1286	78.7732	61.6955	52.8308	92.7248	60.5149	44.5872	95.6497
NM_012423	RPL13A	282.301	301.736	275.116	288.793	227.327	132.38	225.43	121.534	155.109	218.344	271.255	164.79	243.05	254.652	114.066	344.685	419.818	116.415
NM_032952	MLXIPL	3.435	5.38814	10.7908	6.16234	7.72533	6.89518	6.95498	10.2199	2.59893	5.37034	6.9438	4.44488	2.58969	2.54182	3.42568	8.65104	12.1532	3.94625
NM_012454	TIAM2	3.29479	2.34645	2.29592	1.86392	2.15035	2.82075	4.56306	5.52426	1.45698	4.54413	3.91878	1.81088	1.78993	2.42451	2.26835	5.76736	4.86129	1.55031
NM_004452	ESRRB	0.035051	0.0869055	0	0	0	0	0	0	0	0.0375548	0	0	0.0380837	0	0	0	0	0
NM_145174	DNAJB7	0.525765	0.347622	0.81997	0.760783	0.398213	0.940251	1.17756	1.93349	1.10258	1.23931	1.27188	1.6051	0.761673	1.52509	1.3425	1.31462	1.13937	0.751668
NM_001040185	ZNF765	2.27831	4.12801	2.49271	4.90705	5.60153	4.70126	2.98071	5.52426	3.30773	10.2149	6.15317	4.73298	7.08356	5.70933	8.05497	14.8001	12.0773	7.14084
NM_001001410	TSR3	9.0081	8.47329	9.34766	9.39567	9.07926	9.44169	8.57413	7.18154	7.63928	9.01316	8.35318	8.76629	7.65481	8.52489	6.85136	7.93012	8.58322	6.76501
NM_015559	SETBP1	9.70912	10.2549	14.7267	16.6611	5.9732	18.9617	11.702	20.4398	17.6412	9.05071	11.4126	14.7751	5.8268	3.67587	12.4065	6.91235	2.65852	15.6441
NM_005704	PTPRU	0.841224	0.825602	1.01676	1.7498	9.76949	3.80018	4.59986	0.828639	2.44142	0.826206	2.02814	1.39931	3.27519	1.72062	1.62025	0.466478	0.303831	1.97313
NM_001459	FLT3LG	0.806173	0.651791	1.21356	1.82588	0.690236	0.783543	0.699178	0.828639	0.826932	0.413103	0.378128	0.246938	0.266586	0.7821	0.324051	0.212035	0.455746	0.375834
NM_000305	PON2	26.6388	33.5021	27.4854	25.6003	29.3616	47.561	31.7574	14.6393	48.1196	38.5688	35.9565	61.611	30.048	40.9038	52.3573	32.8655	28.0284	43.6907
NR_037170	LOC100507547	0.35051	1.17322	0.721574	0.646665	0.31857	0.391771	0.95677	0.828639	0.433155	0.863761	0.275002	0.699657	0.495087	0.117315	0.138879	1.48425	0.303831	0.187917
NM_003930	SKAP2	43.0076	46.6683	41.3593	22.9756	22.3265	43.3691	5.37263	5.24805	40.4803	33.3862	43.8628	50.4576	44.177	42.6244	52.0333	42.7887	49.4485	51.3013
NM_001025253	TPD52	72.5555	97.9425	53.6589	89.0877	71.5456	136.767	149.146	65.1863	174.837	124.156	140.56	164.996	121.715	110.354	193.875	173.657	142.952	231.279
NR_023316	ACSF3	5.2226	4.73635	7.28134	4.64077	2.86713	8.65815	6.69739	9.66745	5.27661	4.16859	6.3938	5.35032	6.2838	4.80991	4.25895	4.11348	4.55746	6.29522
NR_033202	HOXB-AS3	2.17316	1.52085	2.42711	2.66274	3.58392	0.940251	1.76634	17.4014	0.590666	2.81661	1.20313	0.864283	2.13268	2.62003	0.972152	1.61147	2.81044	0.704688
NM_198060	NRAP	0.385561	0.651791	0.327988	0.342352	0.185833	4.66208	2.75991	3.03834	1.33884	1.87774	1.23751	2.634	0.685506	0.977625	2.73128	0.932955	1.82299	1.69125
NM_006292	TSG101	48.8961	52.7082	43.7864	39.2183	42.715	45.994	48.7585	29.0024	57.1371	68.838	52.7316	63.5453	65.2754	81.8076	72.5873	42.4495	37.9029	65.489
NM_001271775	RALGDS	25.6223	18.7281	22.336	28.4152	39.1576	26.9931	22.8521	27.0689	34.3768	18.5896	21.5533	18.8496	18.5467	21.0776	15.323	18.2774	13.9762	15.2682
NM_001204108	BCL2L11	20.0492	22.8127	20.5649	25.8286	19.6452	47.0517	22.6681	12.982	33.5104	15.6979	15.7095	40.0862	12.6057	12.3181	27.5906	15.6482	14.356	45.6638
NR_029632	MIR218-2	0	0	0	0	0	0	0	0	0	0	0	0	0	0	0	0	0	0
NM_001014838	CUTA	36.8386	31.0253	40.4737	29.7086	25.2202	21.1165	29.6231	15.4679	26.5012	24.0351	27.7408	28.974	29.7052	35.5855	26.6647	22.4757	20.7365	24.3352
NM_001144037	TMEM25	1.15668	0.651791	0.721574	1.29333	0.292023	2.11557	1.50875	0	0.86631	0.300439	0.309377	1.52278	1.4091	2.03346	1.11103	0.254442	0.227873	0.892605
NR_033417	GTF2H2B	9.95448	10.3852	10.2332	14.6831	19.831	17.6689	11.6284	20.1635	6.96986	1.35197	13.3032	10.7006	9.06391	7.54726	7.2217	9.71122	11.3937	7.4697
NM_147193	GLIS1	0.560816	0.173811	0.524781	0.152157	0.10619	0.666011	0.220793	0.828639	0	0.112664	0.240627	0.452719	0.152335	0.117315	0.416636	0	0	0.234896
NM_004319	ASTN1	0	0	0.163994	0.114117	0	0.0783543	0	0	0	0	0.171876	0.164625	0	0	0	0.0848141	0	0.140938
NM_001243788	SMUG1	11.006	10.2549	11.25	13.618	7.93771	11.2438	8.79492	12.7058	7.75741	8.44984	10.3469	12.7585	9.97792	11.7315	9.39747	8.43901	6.91215	10.0536
NR_004422	HPVC1	0	0	0	0	0	0.0391771	0	0	0	0	0	0	0	0	0	0	0	0.0939584
NM_152613	WBP2NL	0.105153	0.0869055	0.327988	0.45647	0	0.391771	0.294391	1.65728	0.157511	0.150219	0.275002	0	0	0.195525	0.0462929	0.296849	0.379789	0.0939584
NM_001243962	HLA-DQB1	0	0	0	0	0	0	0	0	0	0	0	0	0	0	0	0	0	0
NM_001267597	ZNF248	6.90504	7.30006	6.52696	7.45567	4.77856	9.12827	11.3708	14.9155	5.98541	12.8062	9.62507	7.24351	8.49265	8.40757	7.63834	11.0682	9.3428	8.78511
NM_001001957	OR2W3	1.05153	0.391075	1.04956	0.152157	0.504403	0.27424	0.147195	0	0.0393777	0	0	0.164625	0.495087	0.273735	0.277758	0.127221	0	0.375834
NM_021903	GABBR1	4.17107	2.86788	7.31413	7.72194	4.40689	8.10967	6.2926	75.4061	3.89839	22.7582	7.80318	5.96767	9.67325	7.89921	5.64774	8.43901	18.6856	6.01334
NM_000327	ROM1	0.981428	1.12977	0.721574	0.494509	1.5663	0.626834	0.883172	1.10485	0.748177	1.1642	0.996882	0.535032	1.21868	1.87704	0.648101	0.551292	0.455746	1.03354
NM_001243137	PDE8A	29.7583	29.852	31.4541	33.056	33.7685	63.9371	54.3151	34.2504	47.4502	33.2736	31.2127	65.8089	33.0947	29.0159	74.2539	37.1062	31.5984	77.7976
NM_175075	C8orf42	0.736071	0.78215	0.81997	4.71685	2.60166	12.8109	1.91354	1.93349	5.59164	1.31442	4.33128	8.51936	1.75185	1.32957	13.8879	3.05331	2.27873	21.1407
NM_080753	WFDC10A	0	0	0	0	0	0	0.0367988	0	0.157511	0	0.0343752	0	0	0	0	0	0	0
NR_047479	LINC00854	0.35051	0.347622	0.590379	0.608626	0.31857	0.82272	0.588781	3.03834	0.590666	0.638432	0.446878	0.823126	0.0761673	0.46926	0.416636	0.254442	0.531704	0.61073
NR_003261	CDRT15P1	0.35051	0.78215	0.754373	1.25529	0.663688	0.744366	0.588781	1.65728	0.787554	0.525768	0.618754	0.246938	0.304669	0.195525	0.138879	0.72092	0.759577	0.469792
NM_002754	MAPK13	60.3228	68.1339	59.5298	60.0258	45.3963	95.8273	65.4283	39.4985	67.6115	56.3698	75.8662	93.7541	48.7471	56.7413	80.1794	46.0965	43.068	85.5492
NM_001004487	OR13J1	0	0	0	0	0	0	0	0	0	0	0	0	0.0380837	0	0	0	0	0
NM_003540	HIST1H4F	0	0	0	0.0380391	0	0.0783543	0	0	0	0	0.0343752	0	0	0	0	0	0	0
NM_001001961	OR13C3	0	0	0	0	0	0	0	0	0	0	0	0	0	0	0	0	0	0
NM_001130148	CCDC77	5.1525	6.21374	4.39504	3.57568	11.3358	4.07442	5.07824	8.01018	5.07973	8.22451	11.172	3.00441	6.13147	6.92158	3.47197	7.50605	5.69683	4.32209
NM_001201583	ASB11	0	0	0	0.0760783	0	0.0783543	0	0	0	0	0	0.0411563	0	0	0.0925859	0	0	0.0939584
NM_001134888	RTL1	0	0	0.0655976	0	0	0.0391771	0	0	0	0	0	0.0411563	0	0	0	0	0.151915	0.0939584
NM_001381	DOK1	5.81846	4.60599	6.13338	4.5647	4.61927	6.07246	5.63022	7.45775	5.39475	3.9057	3.12815	5.43263	4.07495	4.06692	5.46257	3.43497	3.72193	4.22813
NM_153368	GJD4	0	0	0	0.228235	0	0	0.0735977	0	0	0	0	0.0823126	0	0	0	0	0	0
NM_004573	PLCB2	6.44938	6.2572	12.5619	8.48273	3.61046	6.93435	6.3294	12.4296	6.73359	2.59128	2.85315	3.37482	6.0553	7.62547	7.77721	3.43497	4.48151	4.79188
NM_001177651	SLC9A6	10.971	11.9061	9.54445	11.8302	13.6454	13.046	14.6827	6.07669	20.7521	13.0315	9.59069	15.7629	14.7003	14.5471	17.0821	14.0367	9.64663	18.7917
NM_183360	DTNB	4.20612	3.25896	3.41108	2.39647	2.81404	1.80215	1.98714	4.69562	1.73262	3.19216	2.47502	2.09897	3.42753	3.55855	2.36094	4.07108	3.49406	1.73823
NM_001320	CSNK2B	37.5747	28.1139	34.3404	32.029	35.4941	30.9108	27.9671	9.39124	30.7146	33.6116	36.0253	33.707	38.0456	42.7418	40.3212	28.8368	22.7114	33.3552
NM_145664	SPANXB2	0	0	0	0	0	0	0	0	0	0	0	0	0	0	0	0	0	0
NM_173561	UNC5CL	10.9009	7.0828	9.31486	11.7921	4.51308	4.6229	5.74062	15.4679	6.1823	7.62363	5.94692	1.52278	5.06513	8.13384	2.49982	6.86994	15.6473	1.87917
NM_006345	SLC30A9	51.2095	49.0582	36.6035	52.9124	33.503	41.2535	49.7152	30.1072	56.2708	93.2111	47.0941	55.026	91.8197	76.8413	66.1063	77.3929	65.5515	78.4553
NM_002461	MVD	13.5647	12.6013	12.1356	7.72194	13.7251	12.1841	7.94855	13.5344	20.0433	9.01316	10.622	11.1122	7.73098	6.21769	11.5732	7.42124	9.11493	13.1072
NM_001198614	MAP7	65.0546	76.1727	48.903	52.6842	61.723	73.7314	104.067	67.6722	79.7005	96.8915	90.9225	82.5184	90.9438	114.343	88.651	80.6158	82.4141	95.5557
NM_181307	MRPL52	12.1276	13.4269	11.8404	13.1235	16.778	8.38391	7.80135	7.18154	11.262	14.5713	12.0657	10.7006	12.1487	12.5136	11.4806	10.517	14.2801	8.78511
NM_006913	RNF5	18.2265	20.1186	21.9424	20.1227	12.5304	35.2986	26.4952	13.8106	25.3593	18.0263	24.2345	30.9495	23.231	20.0609	38.7935	16.5388	16.7867	35.3284
NM_173664	ARL10	0.525765	0.912508	0.360787	1.29333	0.345118	0.54848	0.404787	1.10485	0.590666	0.901316	0.343752	0.32925	0	0.7821	0.277758	0.636106	0.68362	0
NM_031243	HNRNPA2B1	321.242	386.208	339.304	296.895	542.154	281.174	295.274	217.103	457.097	453.963	374.725	405.349	471.704	440.205	609.678	595.862	527.906	523.583
NM_004612	TGFBR1	41.0447	36.5872	35.9147	33.3223	67.4838	29.3045	37.0196	20.9922	40.3622	45.0282	54.3129	31.4434	31.5333	41.0211	34.6734	29.3033	28.3322	35.2814
NM_001127215	GFI1	8.02668	6.77863	5.93658	6.50469	5.65462	7.79625	9.01572	4.97183	6.5367	6.60965	9.04069	7.40814	5.10321	5.94396	4.90705	7.42124	5.16513	6.90595
NM_001024649	CANX	605.821	663.697	465.317	423.261	637.38	344.328	570.603	230.638	720.415	696.492	596.892	534.25	781.781	847.561	660.323	686.528	557.606	698.205
NM_001256277	RAB34	3.08449	1.99883	4.19825	2.35843	1.40702	1.80215	0.919971	3.86698	2.87457	1.61486	1.51251	1.68741	1.71376	1.79883	2.36094	1.2298	0.987451	2.30198
NM_001025390	AMPD3	10.4802	9.77687	11.2828	10.2706	7.38021	10.8129	10.3037	10.4961	10.4351	9.61404	10.5532	8.51936	7.35014	8.21205	6.61989	5.93699	7.51982	10.0536
NM_001033087	MACROD2	0.175255	0.217264	0.524781	0.45647	0.238928	0.587657	1.72955	0.828639	0.393777	1.1642	1.61564	1.19353	1.18059	0.899415	1.06474	1.86591	2.88639	1.3624
NM_016618	KRCC1	25.6223	27.4187	21.1224	23.5462	11.2562	26.327	27.0103	17.9538	18.8226	40.5968	25.5064	43.4199	33.2089	32.3007	26.711	34.8162	26.5092	39.6035
NM_138567	SYT8	0.210306	0.608339	0.491982	0.570587	0.159285	0.430949	0.183994	0.828639	0.275644	0.300439	0.240627	0.370407	0.0761673	0.117315	0.555515	0.466478	0.607662	0.0939584
NR_031601	MIR1236	0.315459	0.0869055	0.491982	0.152157	0.21238	0.195886	0.147195	0.552426	0.315022	0	0.206251	0.370407	0.0380837	0	0	0	0	0
NM_014223	NFYC	34.6654	25.4633	26.9934	26.7415	24.7954	27.8158	31.6102	23.7543	23.8235	24.5984	26.2971	30.0441	26.0492	28.7813	25.9703	17.8958	17.8501	27.154
NM_017786	SYBU	12.5833	12.4275	8.46209	14.4168	18.1585	21.4299	23.5881	14.3631	18.6257	16.5241	23.3752	19.3023	12.6819	17.7537	14.1656	23.8328	18.6856	14.0468
NM_005372	MOS	0	0	0	0	0	0	0	0	0	0	0	0	0	0	0	0	0	0
NM_000259	MYO5A	15.107	12.1668	18.0065	22.5192	13.5392	14.3388	12.7324	12.1534	17.8381	12.7311	11.172	12.3057	10.473	8.72041	14.1656	8.69345	9.57067	14.7045
NM_001270771	SORBS2	11.3565	12.6013	12.2012	20.0086	13.7516	15.2399	2.39192	14.0869	7.44239	21.7818	22.5845	17.6561	17.3281	20.6083	15.6933	29.5153	25.8256	17.7581
NM_001012331	NTRK1	0.315459	0.0869055	0.131195	0.152157	0	0.235063	0	0	0.196889	0	0.171876	0.0411563	0.0380837	0.07821	0.0462929	0.0424071	0	0.187917
NM_001191036	TRIQK	26.6738	32.4158	17.8754	38.914	14.2295	37.4142	42.3923	24.8592	27.2888	42.4745	49.6379	33.8716	46.1193	54.5515	34.9512	42.7039	45.4227	42.7981
NM_004401	DFFA	8.69265	9.25544	9.18367	6.65685	12.265	6.07246	9.12611	3.86698	7.9543	4.73191	6.25629	6.83195	8.79732	9.61983	7.12911	7.8029	9.49472	5.40261
NM_001079528	ABCC6	3.15459	1.6512	2.06632	1.82588	1.30083	3.68265	3.2015	6.07669	2.95333	1.12664	3.1969	4.15679	1.18059	2.3854	2.91646	1.56906	1.21532	3.14761
NM_016567	BCCIP	17.175	17.5549	16.2026	11.5259	27.0785	10.9304	15.8603	8.28639	17.2868	17.6508	18.4251	16.051	17.3281	16.776	15.3693	16.9628	14.6598	16.6776
NM_001014442	C1QTNF9B-AS1	0.490714	0.521433	0.229592	1.10313	0.796426	0.509303	0.294391	0.828639	0.51191	0.262884	0.309377	0.32925	0.0761673	0.15642	0.0925859	0.296849	0.303831	0.140938
NR_047594	CENPJ	5.74836	7.47387	10.0692	6.3145	15.2383	7.91378	7.13898	9.94367	8.26932	9.98958	10.2094	6.58501	7.50248	6.13948	9.8604	13.231	14.2801	9.58376
NM_014191	SCN8A	2.41852	1.95537	3.57507	2.32039	2.28309	4.50537	4.15827	10.2199	4.44968	7.99918	7.94068	5.22685	2.05652	3.20661	4.30524	12.7221	15.9511	8.87907
NM_152416	NDUFAF6	1.82265	2.60717	2.32872	2.16823	2.65475	2.7424	2.17113	2.48592	3.54399	2.92928	2.30314	1.81088	2.89436	2.69824	3.33309	5.25848	2.96235	4.04021
NM_005063	SCD	217.351	228.822	114.173	75.8881	896.139	65.7001	120.369	196.111	131.6	107.745	350.043	74.7399	114.898	121.734	109.761	125.398	112.949	95.0859
NR_039950	MIR4787	0	0	0	0	0	0	0	0	0	0	0	0	0	0	0	0	0	0
NM_022913	GPBP1	40.7292	48.4933	40.3425	51.0866	51.9004	55.6707	53.7263	35.6315	52.2149	60.0502	42.0753	47.8648	49.4707	51.1102	58.2365	59.6667	53.3223	57.5965
NM_001199053	LOC81691	1.6474	1.86847	2.26312	0.646665	4.00868	1.80215	1.95034	3.86698	2.40204	2.21573	2.75002	2.05782	2.39927	2.15077	3.14792	1.8235	2.05086	1.97313
NM_007156	ZXDA	6.30918	7.47387	5.77259	8.21645	4.11487	6.73847	10.5981	4.97183	5.59164	10.0647	7.73443	6.66732	8.34032	6.2568	4.67559	5.80977	5.01321	4.83886
NM_019903	ADD3	150.789	153.041	132.114	162.351	109.562	153.535	269.073	122.915	143.847	179.625	172.22	185.491	264.224	320.348	236.557	243.417	178.956	267.735
NM_001040065	SPATA31A2	0	0	0	0	0	0	0	0	0	0	0	0	0	0	0	0	0	0
NM_005402	RALA	27.515	29.7217	27.5182	25.7905	28.6713	30.2056	24.1768	16.5728	28.4701	26.6264	28.9783	35.3944	23.3834	24.9099	31.9884	36.258	33.6493	35.7512
NM_001077365	POMT1	6.79989	5.69231	7.31413	6.42861	10.5925	12.7326	8.27974	10.4961	8.07243	6.75987	7.76881	10.1245	7.9214	7.27353	7.08282	7.12439	9.64663	6.67105
NM_000026	ADSL	12.1627	12.4709	12.1684	7.45567	9.84914	7.52201	9.86209	7.45775	8.46621	12.994	11.8251	7.24351	16.0332	14.9381	9.30488	12.6373	11.0139	9.63074
NM_177456	MAGEC3	0	0	0	0	0	0	0	0	0	0	0	0	0	0	0	0	0	0
NM_005873	RGS19	7.99163	6.12684	12.1684	14.0364	4.96439	4.81879	3.93748	0	8.22994	2.85417	4.09065	3.5806	2.36119	2.3463	3.00904	2.33239	3.03831	2.67782
NM_001277206	P2RY6	3.5752	1.47739	4.19825	2.28235	0.610593	0.861897	1.25116	0	0.630044	0.675987	1.16876	1.64625	1.18059	0.430155	1.3425	0.975362	0.759577	1.26844
NM_006884	SHOX2	0.140204	0	0.0327988	0	0.0530951	0	0	0	0.157511	0	0	0.123469	0.0380837	0.23463	0	0.0848141	0.0759577	0
NM_194455	KRIT1	20.61	23.9425	22.992	23.8505	22.5654	24.3682	30.175	34.2504	18.2319	37.1042	26.4689	26.34	35.532	35.39	28.2387	59.1578	47.9293	34.3418
NM_017919	STX17	41.9911	47.3635	44.8032	41.2344	65.0946	48.0312	62.19	41.1557	45.0087	42.8501	58.7817	37.9461	36.4841	39.496	38.3768	41.3045	40.1816	41.6706
NM_004727	SLC24A1	10.1297	10.559	10.5284	9.69998	4.77856	7.20859	16.2283	10.7723	6.30044	15.435	10.1407	6.54385	9.86367	14.3515	5.8792	9.0327	11.0898	5.21469
NM_178820	FBXO27	0.280408	0.521433	0.26239	0.532548	0.584046	0.27424	0.110397	0.552426	0.433155	0.112664	0.343752	0.535032	0.190418	0.15642	0.324051	0.127221	0	0.657709
NR_027499	BCDIN3D-AS1	1.19173	1.47739	1.44315	1.40745	2.1769	1.41038	2.42872	0.276213	0.984443	1.87774	2.30314	1.44047	2.36119	1.5642	0.879566	1.39943	1.67107	0.892605
NM_002350	LYN	42.5168	37.6301	36.1443	39.9411	42.2902	19.6669	16.8171	12.7058	24.4929	20.5425	27.8783	18.7261	22.3551	20.6865	16.7118	28.3703	32.6618	17.4763
NM_014482	BMP10	0	0	0	0	0	0	0	0	0	0	0	0	0	0	0	0	0	0
NM_001261453	GPR1	0.070102	0.130358	0.0327988	0.0380391	0.10619	0	0	0	0	0.0751097	0	0.0823126	0	0.273735	0	0.0424071	0	0.0939584
NM_005291	GPR17	0.070102	0.0434528	0.295189	0.0380391	0.185833	0.0783543	0.0367988	0.552426	0	0.225329	0.309377	0	0	0.039105	0.416636	0.0848141	0.0759577	0.187917
NM_001031835	PHKB	62.0052	66.8738	57.4635	71.8559	72.1031	77.3357	71.0954	70.9867	82.5751	73.7952	73.9068	85.4405	86.2976	94.986	100.039	73.7883	63.3487	103.542
NR_045609	KIN	3.85561	3.56313	3.34548	4.07019	3.71665	3.68265	4.41586	6.62911	3.34711	5.67078	4.19378	5.1857	4.26537	4.65349	5.97179	6.10662	6.30449	6.3422
NM_178172	GPIHBP1	0.070102	0.0869055	0.163994	0	0.0530951	0.0783543	0	0.276213	0.118133	0.150219	0.240627	0.164625	0.0380837	0	0.185172	0	0.0759577	0.0939584
NM_018386	PCID2	10.971	11.7322	16.0386	8.55881	12.2384	8.42309	13.3212	9.94367	7.91492	13.1066	13.2688	8.60167	13.9005	17.128	8.47161	13.231	13.2926	9.16095
NM_021253	TRIM39	7.11535	7.21316	6.10058	5.85803	8.12355	9.0891	9.34691	8.28639	7.56052	6.60965	7.76881	5.76188	7.31206	8.91594	6.5736	6.19143	6.60832	8.40928
NM_001199723	CRABP2	0	0.0434528	0.0655976	0.114117	0.132738	0.117531	0.0735977	0.552426	0.118133	0	0	0.0411563	0.0761673	0.117315	0.0925859	0	0	0.0939584
NM_001172303	MASTL	7.18545	8.60365	6.85495	10.3466	23.468	9.95099	10.3037	8.83882	10.947	8.90049	9.69382	8.23126	9.17816	8.56399	11.2029	10.8138	12.0773	11.228
NM_001024736	CD276	32.3521	23.8556	27.7478	24.0407	32.0429	23.5063	34.8853	27.0689	25.5955	23.7722	30.9033	26.0519	29.7814	24.4797	18.2857	16.1571	18.3818	16.8186
NR_033655	AGA	6.69474	6.30065	4.85422	8.29253	4.53963	8.65815	6.219	4.41941	6.10355	9.68915	5.56879	6.83195	10.7396	12.3572	7.12911	5.9794	5.77279	7.98647
NM_001166102	NDUFV1	76.7967	58.9219	63.7937	40.3976	52.6438	59.6276	43.3122	48.8897	63.7525	51.2623	46.991	60.8702	49.1279	46.2221	61.5233	44.3578	38.7384	53.7912
NM_080681	COL11A2	1.99791	3.17205	0.426385	0.304313	0	0.352594	0.0367988	0.276213	1.0632	0.262884	0	0.32925	0.0761673	0.39105	0.370344	0.0848141	0.531704	0
NM_018124	RFWD3	24.0099	27.8967	27.9774	23.7745	33.1844	18.0607	23.2569	23.4781	27.8007	31.4709	28.0502	22.6771	30.3908	24.6752	22.7761	32.2718	23.5469	20.1071
NM_018401	STK32B	0.035051	0.564886	0.918367	0.342352	0.159285	0.156709	0.404787	0	0.826932	0.150219	0.103126	0.123469	0.41892	0	0.370344	0.466478	0.303831	0.422813
NM_001042500	DEFA1B	0.245357	0	0	0	0	0	0	0	0	0	0	0.288094	0	0	0	0.0424071	0	0
NM_001099669	HIGD1A	59.4114	82.6037	45.1312	64.6665	59.9709	192.164	60.2765	35.3553	284.307	67.9742	89.1694	358.842	84.5838	77.8971	376.362	57.5464	39.7259	354.176
NM_001276697	TP53	76.6565	64.5273	64.4825	77.1053	83.3858	25.2693	51.6288	19.6111	35.5187	103.313	71.8443	43.0907	104.882	88.1817	37.2195	71.9224	54.0819	37.4894
NM_005781	TNK2	6.06382	5.5185	6.33017	13.5419	10.2473	4.81879	11.9228	31.4883	5.19786	9.20093	5.94692	3.66291	10.0541	8.01652	4.02749	5.00403	5.84875	3.14761
NM_001111285	IGF1	1.40204	0.999413	1.41035	1.97803	0.955711	0.901074	1.25116	0	1.96889	1.38953	1.13438	1.15238	1.21868	1.01673	1.80542	0.975362	0.303831	2.20802
NM_001004051	GPRASP2	1.19173	1.47739	0.852769	0.760783	0.716783	1.8805	3.42229	1.10485	0.86631	2.14063	1.47814	2.22244	1.25676	0.86031	1.66655	1.10258	1.74703	1.78521
NM_001242852	RNF146	6.79989	7.47387	6.98615	7.53175	8.33593	10.7345	9.01572	9.66745	8.54497	9.01316	6.6688	8.84861	8.1499	7.27353	7.68463	6.53069	5.77279	6.43615
NM_018903	PCDHA12	0.665969	0.869055	0.655976	1.67372	0.292023	1.29285	0.220793	2.2097	1.29946	0.187774	0.275002	1.19353	2.66586	4.10602	0.694394	0.593699	0.379789	0.281875
NM_001165412	NFKB1	42.2364	38.8902	47.5911	34.3874	24.291	33.6923	43.0914	25.4116	39.4171	38.2684	38.2596	36.7937	38.7311	39.6134	37.8676	41.0924	36.7635	38.9928
NM_024644	C14orf169	3.75046	3.78039	4.55903	3.87999	8.68104	3.2517	3.0911	4.97183	4.17404	3.34238	4.88128	4.15679	3.69411	4.26244	2.87016	4.41033	4.70938	2.58386
NM_000935	PLOD2	17.9461	18.9454	8.88848	18.6392	23.2291	48.9714	20.6441	29.5548	52.6086	35.5644	17.772	51.7746	31.1524	21.0385	111.566	18.2774	12.4571	69.0595
NR_046318	ENC1	56.2568	65.744	49.2966	75.0512	85.0052	23.2712	40.8835	53.8615	12.0102	51.2623	48.7785	16.9152	56.0972	64.3668	7.68463	53.4329	80.819	9.34887
NM_052889	CARD16	10.1297	8.86436	9.01967	7.11332	3.42463	6.89518	5.07824	3.31456	3.54399	4.20614	4.29691	3.82754	5.52213	5.12275	9.62893	3.47738	2.50661	3.66438
NM_199053	TRAPPC11	20.0842	25.2461	20.5977	23.3941	14.1764	22.5269	28.6295	32.3169	22.2878	24.5609	24.3033	23.4591	29.2102	30.7365	26.387	28.1159	31.6744	29.9258
NR_002436	SNORA33	0.210306	0.130358	0.295189	0.114117	0.132738	0.156709	0.220793	1.10485	0.157511	0.413103	0.103126	0.32925	0.304669	0.15642	0.0925859	0.593699	0.68362	0.375834
NR_036676	IFNA22P	0	0	0	0	0	0	0	0	0	0	0	0	0	0	0	0	0	0
NM_001072	UGT1A6	51.4198	43.0182	42.0809	41.4627	11.8667	35.2594	24.4712	8.28639	26.895	36.0902	53.7629	65.2328	110.709	82.6288	50.6908	30.8299	31.6744	55.0127
NM_001271052	EMR2	34.1397	23.2472	41.0313	30.8117	47.2015	21.7433	16.2651	5.80047	15.948	13.3695	19.8345	15.269	17.8993	16.2286	14.0268	14.376	17.3943	12.3555
NM_001145079	COG6	10.5153	9.95068	11.5124	13.3898	9.98187	12.7326	14.4251	11.0485	14.4516	12.0551	14.472	12.0588	15.043	18.0665	14.9989	15.4362	14.5839	23.5836
NM_004381	ATF6B	34.6304	30.2431	33.1596	38.4195	25.4856	38.041	27.4519	31.2121	26.58	34.8509	35.0971	28.6859	31.1524	34.3733	34.5345	27.3101	22.4835	32.0868
NM_006164	NFE2L2	134.035	141.178	105.415	115.981	105.261	97.9037	108.998	79.5493	104.115	140.981	135.679	110.916	111.357	140.074	101.243	102.243	88.7946	115.945
NM_006106	YAP1	45.8467	49.1451	40.9001	39.2944	42.423	23.0362	32.567	32.3169	17.9562	48.1077	38.7753	23.2122	60.2864	60.6518	22.1743	44.5698	44.8151	27.8117
NR_028409	LINC00207	0	0	0	0	0	0	0	0	0	0	0	0	0	0	0	0	0	0
NR_028324	FLJ45445	4.27622	3.1286	10.3644	3.91803	1.85833	3.99607	14.7563	119.048	5.67039	0	5.15629	3.74522	1.37101	1.83793	0.324051	1.90832	6.91215	0.657709
NR_039926	MIR4769	0	0	0	0	0	0	0	0	0	0	0	0	0	0	0	0	0	0
NR_046570	ABCC5-AS1	0.035051	0	0	0	0	0	0.0367988	0	0.0393777	0.0751097	0	0.0411563	0	0	0.0462929	0.0424071	0	0
NM_001205029	MDM1	1.26184	1.60775	1.11516	1.21725	1.0619	0.979429	1.17756	0.828639	0.86631	2.14063	2.06251	0.987751	1.8661	1.17315	1.43508	1.90832	1.67107	1.40938
NM_198474	OLFML1	3.25974	1.91192	4.65743	4.64077	2.62821	2.66405	2.90711	3.59077	3.03208	1.76508	3.16252	4.15679	2.93244	1.95525	4.81447	1.10258	2.73448	4.08719
NM_020407	RHBG	0	0	0	0	0.265475	0	0	0	0	0	0	0.0823126	0	0	0	0.0424071	0	0
NM_178328	CCR3	1.8577	1.6512	6.55976	0.45647	0.0530951	0	0.0735977	0	0.472533	0.150219	0.618754	0.0823126	0.457004	0.31284	0	1.35703	1.89894	0.375834
NM_003660	PPFIA3	2.97933	2.52026	1.96793	1.48353	4.27415	2.15474	1.91354	4.97183	1.65386	2.25329	1.78751	1.35816	2.01843	2.15077	1.75913	3.39256	3.34214	0.845626
NM_194302	CCDC108	0.070102	0.0434528	0.163994	0.41843	0.185833	0.27424	1.28796	0.828639	0	0.112664	0.103126	0.205782	0.0761673	0.273735	0.231465	0.212035	0.531704	0.187917
NM_014759	PHYHIP	0	0	0.229592	0.380391	0.185833	0.0783543	0.147195	0.828639	0.196889	0.225329	0.0687505	0.246938	0.190418	0.23463	0.0925859	0.127221	0.151915	0.140938
NM_194318	B3GALTL	3.435	3.47622	3.01749	3.42352	3.66356	3.17335	3.42229	3.59077	2.08702	4.28125	3.85003	2.01666	4.91279	5.82664	3.61085	3.0109	3.49406	3.3825
NR_026829	LINC00852	2.24326	1.6512	3.08309	3.61372	2.94678	5.13221	3.3119	6.3529	2.32329	2.77906	2.68127	1.9755	2.70394	1.79883	2.03689	3.30775	6.60832	4.08719
NM_001009924	TMEM230	34.6654	41.2801	26.8294	33.7407	24.5299	31.4984	34.8485	16.849	26.9344	32.4098	42.4191	33.2131	35.8367	33.7867	25.1371	38.2512	36.3078	23.0198
NR_001590	IFITM4P	0	0	0.196793	0	0.0265475	0.0783543	0	0	0	0	0	0.164625	0.0380837	0	0.0462929	0	0	0
NM_001327	CTAG1B	0.070102	0	0	0	0	0	0	0	0	0	0	0	0	0	0	0	0	0
NM_152564	VPS13B	48.5807	48.3195	48.2142	60.8246	36.2639	60.607	63.4044	157.165	40.0865	65.1201	62.5973	49.5934	59.4105	56.1157	44.719	106.23	185.489	62.7642
NR_003220	SNORD114-27	0	0	0	0	0	0	0	0	0	0	0	0	0	0	0	0	0	0
NM_030809	CSRNP2	20.0141	20.4228	15.0219	20.9976	17.309	20.2154	18.3994	25.964	11.6952	12.2804	12.8563	13.2935	17.1757	19.6307	12.8694	24.5537	21.1162	16.1139
NR_037860	EGFL8	3.22469	3.43277	3.80466	2.51058	2.1769	4.81879	3.97427	14.6393	2.04764	4.2437	3.23127	4.07447	2.89436	3.28482	5.32369	4.02867	4.63342	4.41605
NM_016250	NDRG2	58.0094	60.3559	52.1501	47.8532	39.6355	74.0056	62.926	38.946	61.4292	66.8851	60.3973	82.148	37.8932	43.4456	55.1349	42.8735	33.1176	66.5226
NM_030567	PRR7	0.490714	0.434528	0.81997	0.608626	1.14154	0.195886	0.294391	0	0.551288	0.450658	0.412503	0.164625	0.41892	0.46926	0.0462929	0.551292	0.227873	0
NM_173215	NFAT5	63.5474	55.4892	52.6093	56.0316	29.6536	48.3054	83.607	97.227	36.2275	57.7218	59.1254	46.6713	48.0997	49.898	46.0615	68.233	77.0971	53.9791
NM_001251852	PIK3R5	4.31127	3.9542	7.08454	5.85803	3.31844	3.52594	1.83994	1.38106	6.26106	2.06552	3.3344	4.15679	2.36119	1.21225	2.87016	1.7811	2.43065	3.80532
NM_001135699	YWHAZ	486.368	580.094	361.804	601.741	620.894	509.655	531.118	427.025	679.699	548.075	693.589	728.467	701.463	688.834	715.457	778.297	707.166	799.915
NM_016459	MZB1	20.8553	12.7317	24.5007	16.0906	7.30057	6.93435	7.47016	2.2097	8.97812	7.43586	16.2939	5.43263	3.69411	1.52509	4.76817	4.66478	2.88639	4.32209
NM_001040283	DMRTC2	0	0	0	0	0	0	0	0	0	0	0	0	0	0	0	0	0	0
NM_031450	C11orf68	17.3502	14.1221	15.2186	17.3078	14.0436	17.3555	16.2283	17.1252	13.861	14.4962	14.197	12.4704	11.387	16.8542	8.70307	7.8029	9.72259	7.65761
NM_001257317	DCSTAMP	0.035051	0.0869055	0.196793	0.0760783	0.10619	0	0.0735977	0	0.0787554	0.0751097	0.137501	0	0	0	0	0	0	0
NM_001271684	SLC35A3	45.9168	49.6665	29.6501	58.352	32.9986	103.428	71.169	63.2528	75.8809	99.2574	77.7568	111.451	82.2226	81.2602	99.715	89.8182	82.1103	127.079
NM_001128432	GBA3	0.665969	1.12977	1.77114	1.94	0	2.03721	0.183994	0	0.905688	0.300439	0.103126	0.905439	2.17077	0.15642	1.3425	1.48425	0.379789	1.31542
NM_012110	CHIC2	10.9009	9.08163	7.47813	8.48273	6.61034	9.87264	7.50696	4.69562	9.64754	7.24808	5.84379	7.12004	8.56882	8.17294	10.6937	5.9794	4.55746	7.79855
NR_027329	PSMG3-AS1	0.736071	1.21668	1.93513	1.94	0.530951	3.29088	1.80314	1.65728	2.4808	1.53975	1.99376	3.82754	0.952091	1.09494	2.08318	1.14499	0.759577	1.97313
NM_001083600	NAA60	31.4057	28.6354	32.602	33.4364	15.5569	43.565	23.1833	13.8106	36.1094	23.0962	21.3127	33.7893	30.2384	30.8147	41.6636	25.5715	18.4577	41.9524
NR_033263	C20orf166-AS1	0.035051	0.0869055	0.163994	0	0	0.0783543	0	0.552426	0	0.225329	0.0343752	0.123469	0.0761673	0	0.231465	0	0	0.140938
NR_036488	LINC00673	18.1915	17.3811	15.481	12.9333	12.6632	11.048	15.2347	18.2301	6.41857	20.2421	20.0751	12.4704	15.6524	22.1725	10.6937	15.8602	13.9003	16.3488
NR_003129	RNF5P1	28.6367	32.3723	31.4213	30.8878	20.8398	54.3779	45.005	17.4014	41.8979	25.3495	40.6315	51.9804	32.6377	30.0717	54.0702	23.2815	22.2556	49.845
NM_003078	SMARCD3	0.455663	0.260717	0.721574	0.380391	0.371665	0.666011	0.478385	1.10485	0.393777	0.375548	0.309377	0.699657	0.304669	0.508365	0.509222	0.381664	0.607662	0.845626
NM_001018080	FSHB	0	0	0	0	0	0	0	0	0	0	0	0	0	0	0	0	0	0
NM_016042	EXOSC3	5.4329	5.73576	3.90306	6.88508	18.1851	4.6229	5.96141	2.76213	4.4103	8.1494	7.15005	5.10338	7.6929	5.55291	4.53671	9.71122	7.59577	4.88584
NM_138356	SHF	2.90923	3.38931	4.82142	3.19529	4.99094	1.8805	1.95034	1.65728	1.22071	2.44106	4.19378	1.64625	6.96931	5.74843	1.01844	2.12035	2.50661	1.17448
NM_001174150	ARL13B	4.48653	3.38931	3.67347	3.91803	7.35367	2.50734	5.33583	3.86698	4.01653	4.46902	3.71253	3.62176	4.30345	3.9105	4.44412	5.13125	5.84875	5.30865
NM_145321	OSBPL3	23.8697	27.4621	26.9934	20.8835	35.0958	7.20859	27.4887	37.0125	16.1842	30.4194	22.6877	7.94317	33.7802	36.133	8.10126	48.3865	63.3487	10.4294
NR_034091	LOC100129046	6.55453	7.0828	8.42929	5.70587	2.99987	6.38587	9.4205	6.62911	10.7501	8.1494	8.73131	9.54826	6.47422	8.79862	9.11971	8.9903	5.54491	8.83209
NM_001184787	PARD3	41.5705	38.8468	31.6181	27.9207	34.4322	40.2741	52.2544	50.8232	40.0865	46.0047	40.6659	39.3043	41.2827	49.7024	43.7931	46.9022	44.3593	54.8717
NM_001164623	AGO2	25.7625	26.8973	25.9767	20.9596	33.8216	16.141	23.8088	30.9359	22.7997	27.753	23.6845	15.0221	21.2507	23.3848	18.1005	30.9572	33.7252	17.3353
NM_001001346	CLDN20	0.490714	0.695244	0.655976	0.41843	0.584046	0.744366	0.294391	0.828639	0.157511	0.863761	0.756255	0.535032	0.342753	0.351945	0.324051	0.848141	0.987451	0.469792
NM_002938	RNF4	51.8404	44.6694	55.922	51.6952	48.3165	46.1115	44.5266	21.8208	51.4273	37.5173	46.5441	45.2719	43.6439	49.6633	47.9595	42.5767	37.5231	48.3886
NM_003327	TNFRSF4	0.736071	0.999413	0.852769	0.304313	0.31857	0.156709	0.404787	1.10485	0.354399	0.262884	0.309377	0	0.266586	0.07821	0.0462929	0.0848141	0.151915	0
NM_002258	KLRB1	2.62882	3.2155	3.90306	6.54273	1.91142	1.52791	2.31833	2.48592	2.79582	4.2437	3.50628	2.79863	2.78011	3.40213	3.10163	3.90145	3.9498	2.95969
NM_001145664	RFX8	0	0	0	0	0	0	0	0	0	0	0	0	0	0	0	0	0.151915	0
NM_006512	SAA4	0.070102	0.0869055	0.229592	0.0380391	0.0530951	0	0	0	0	0	0.0687505	0	0	0	0	0	0	0
NR_046680	ARHGAP26-AS1	0.315459	0.217264	0.295189	0.342352	0.0796426	0.156709	0.441586	3.86698	0.157511	0.337993	0.206251	0.205782	0.0761673	0.15642	0.277758	0.636106	0.455746	0.939584
NM_178127	ANGPTL5	0.035051	0.0434528	0.0655976	0	0	0.0783543	0.0367988	0	0	0	0	0.205782	0	0	0.0925859	0	0.227873	0.187917
NM_001002901	FCRLB	0.210306	0.173811	0.26239	0.266274	0.371665	0.156709	0.0735977	0	0.393777	0.0751097	0.171876	0.370407	0.0761673	0.07821	0.138879	0	0.151915	0.0939584
NM_001014840	CUTA	36.7334	30.8515	40.3097	29.3282	25.1405	20.9989	29.4023	15.4679	26.4618	23.622	27.6033	28.7271	29.4006	35.1945	26.3407	22.2637	20.5086	23.8654
NM_006114	TOMM40	6.65969	7.64768	6.36297	6.3145	18.5833	4.70126	3.86388	1.65728	7.28488	6.83498	7.11568	6.13229	8.49265	5.4747	5.83291	8.90548	9.41876	6.24824
NM_006588	SULT1C4	0.315459	0.0869055	0.229592	0.152157	1.30083	0.235063	0.588781	0	0.0393777	0.150219	0.0687505	0.164625	0	0.07821	0.509222	0.0848141	0	0.0469792
NM_182643	DLC1	11.5668	13.0793	13.7755	6.04822	5.01748	5.28891	6.51339	22.097	6.02479	4.2437	5.53441	4.85644	7.88332	7.0389	5.2774	4.792	9.72259	4.18115
NM_198798	ANKEF1	11.006	14.1221	12.07	11.5259	15.079	10.4211	11.2236	3.59077	9.05688	11.8673	11.2751	8.39589	15.2335	14.6644	8.5179	16.0723	13.6724	8.83209
NM_002768	CHMP1A	52.0858	39.9765	48.6078	46.636	37.724	55.2006	31.831	29.2786	58.6728	29.8936	37.6753	63.2161	30.3527	30.932	50.7371	25.7835	22.7114	35.9861
NR_038953	LOC100507564	0.525765	0.608339	0.590379	0.798822	0.876069	0.313417	0.478385	0.552426	0.275644	0.675987	0.825006	0.205782	0.723589	0.430155	0.648101	0.424071	1.06341	0.140938
NM_015343	CTDNEP1	47.459	42.8444	51.0021	54.9665	57.1303	48.3838	37.9396	25.4116	46.1507	40.9348	41.2847	46.6301	60.0579	55.5291	47.0336	35.9612	38.1308	50.8785
NM_032348	MXRA8	4.87209	3.8673	5.67419	2.89097	2.54856	2.93829	3.45909	14.0869	2.16577	2.40351	3.6094	3.49829	3.5037	1.99435	1.9906	1.2298	1.51915	1.92615
NR_039954	MIR4791	0	0	0	0.0380391	0.0265475	0.0391771	0	0	0	0.0375548	0.0343752	0	0.0380837	0	0	0	0.0759577	0
NM_025236	RNF39	4.87209	4.04111	1.83673	5.62979	2.20345	4.6229	9.89889	4.69562	5.27661	3.9057	3.26565	3.53944	3.35136	4.92723	1.80542	2.96849	2.65852	3.19459
NM_014465	SULT1B1	36.453	43.2789	23.3528	32.067	8.97307	55.5532	47.5073	20.1635	50.9548	30.2692	27.2252	53.7501	49.6611	48.3729	79.4387	27.819	13.9003	64.3146
NM_001167947	TIMM17B	10.305	7.51733	9.21647	8.97724	9.1058	9.99017	6.14541	4.14319	8.03306	6.08388	7.59693	8.39589	6.39805	6.99979	8.05497	7.33642	7.67173	7.75157
NM_001174065	FGFR1	8.37719	4.51909	9.47886	5.81999	4.83165	6.93435	5.74062	14.3631	10.3563	3.15461	5.29379	6.95542	3.42753	3.71497	5.55515	1.95072	2.65852	4.22813
NM_032860	LTV1	13.2843	14.8608	13.2507	8.21645	18.0523	5.83739	12.6588	5.80047	9.13563	24.8989	12.1001	10.8241	22.3932	18.1838	13.1009	23.6631	20.2807	16.2548
NR_029522	MIR105-2	0	0	0	0	0	0	0	0	0	0	0	0	0	0	0	0	0	0
NM_001127389	DUX4L5	0.315459	0	0	0	0	0	0	0	0	0	0	0	0	0	0	0	0	0
NM_172364	CACNA2D4	2.10306	1.95537	2.55831	2.8149	1.00881	2.85993	2.02394	3.03834	2.20515	1.46464	3.91878	2.67516	1.8661	1.36867	3.05533	1.39943	1.59511	2.77177
NM_001018074	NR3C1	13.3544	14.5567	19.2529	21.7584	8.38902	41.0968	11.4812	9.94367	30.3996	8.93805	15.0907	30.0853	12.4914	8.09473	39.6731	8.14216	8.65918	34.3888
NM_152246	CPT1B	8.41224	7.99531	10.8892	4.67881	5.54843	8.38391	8.46373	64.3576	6.57608	9.53893	4.53753	5.47379	6.13147	8.09473	4.16636	8.56623	17.2424	8.31532
NM_023922	TAS2R14	0.315459	0.173811	0.26239	0.0380391	0.265475	0.470126	0.515184	4.41941	0.433155	1.08909	0.550004	0.658501	0.342753	0.430155	0.370344	1.2298	1.51915	0.422813
NR_073538	EPC1	23.2739	21.4657	21.2864	34.7678	19.9107	29.187	28.3351	27.8975	20.6733	32.9356	24.9908	22.2656	28.1057	33.513	23.5631	33.2471	28.2563	29.7848
NM_001198528	TCF7L2	92.3243	84.7763	79.1435	103.847	78.6338	86.1114	76.468	158.546	106.28	74.1708	62.9411	85.1113	82.2226	89.1985	111.242	59.2003	77.6288	118.247
NM_175721	TPO	0.035051	0	0.229592	0.0760783	0.10619	0	0.147195	0.828639	0.0393777	0.225329	0	0.617345	0.152335	0.07821	0.185172	0.254442	0.0759577	0.0469792
NM_000415	IAPP	0	0	0	0	0	0	0	0	0	0	0.0687505	0	0	0	0	0	0	0
NM_173076	ABCA12	1.47214	1.47739	11.6764	0.0760783	17.4417	0.352594	0.0735977	0	0.51191	0.0751097	3.02502	0.493876	1.44718	0.54747	0.78698	0.127221	3.26618	1.73823
NR_021487	PSMG3-AS1	0.70102	0.999413	1.86953	1.71176	0.610593	3.17335	1.50875	1.65728	2.32329	1.46464	1.82189	3.74522	0.914008	1.01673	1.89801	1.06018	0.759577	1.78521
NM_001005283	OR9Q2	0	0	0	0	0	0	0	0	0	0	0	0	0	0	0	0	0	0
NM_014384	ACAD8	14.5462	15.165	14.2019	12.5529	9.05271	17.6689	15.1611	9.11503	13.9397	11.8673	11.4126	18.7673	14.3956	15.7593	15.0915	12.5101	10.0264	17.6172
NM_032199	ARID5B	60.3929	71.306	56.9387	101.07	85.4831	41.7237	128.281	71.8154	33.668	98.6565	87.9663	42.1441	82.3749	83.9193	41.1544	117.552	104.062	38.9928
NM_005542	INSIG1	13.7049	11.993	12.8899	8.02626	44.945	11.2047	11.886	5.24805	32.526	9.65159	20.7283	17.3268	7.6929	7.62547	17.4524	12.4677	13.9003	50.8315
NM_020145	SH3GLB2	22.713	22.3347	22.4016	16.6231	18.8487	24.4465	21.7113	35.9077	18.1925	13.6324	15.1939	19.5904	14.7384	12.4745	13.1009	15.0969	16.7107	21.8453
NM_024828	CAAP1	20.5399	21.8567	14.7267	11.8302	21.6893	13.9079	13.8364	11.8772	18.4288	23.6971	21.072	18.8907	25.9731	23.6976	21.4799	20.1434	18.1539	23.4426
NM_017519	ARID1B	75.64	65.2226	66.4176	70.6767	64.2185	56.1017	85.9253	58.8334	64.422	76.9498	70.263	54.5321	59.3343	61.9814	44.6264	60.4725	58.3355	52.5698
NM_001256478	CMPK2	0.525765	0.78215	0.754373	0.570587	3.82285	0.54848	0.257592	0	0.157511	0.300439	0.171876	0.32925	0.0380837	0.23463	0.277758	0.169628	0.227873	0.61073
NM_024320	PRR15L	52.0858	50.9701	45.7543	53.6352	80.4921	105.543	55.6398	29.831	55.877	34.2876	47.1972	91.8197	25.9731	30.3846	41.7099	37.5727	22.0277	59.3348
NR_003003	SCARNA17	0.455663	0.738697	0.885568	0.722744	0.504403	0.509303	0.367988	2.76213	0.315022	0.901316	0.378128	0.205782	1.02826	0.62568	0.231465	0.636106	1.36724	0.328855
NM_000090	COL3A1	132.598	111.63	133.786	79.5779	70.5899	49.99	94.6098	208.265	98.6412	85.2495	99.9632	79.0613	94.4094	68.3164	119.714	55.6805	101.328	76.764
NM_005012	ROR1	1.9278	0.955961	1.96793	5.36352	2.36273	8.50144	1.21436	1.38106	7.00923	1.42708	1.54689	10.5772	2.36119	1.21225	9.11971	2.20517	1.4432	12.0267
NM_133642	LARGE	14.0554	10.8632	14.9235	15.7482	15.9816	24.2898	21.1961	15.7441	29.0214	10.7407	8.97194	14.7751	8.60691	11.7315	23.702	13.231	10.9379	22.8789
NM_021160	ABHD16A	13.1091	12.862	15.2842	8.90116	13.0614	12.5367	10.7085	11.6009	14.7273	10.3651	12.0657	12.635	12.8342	15.5638	14.0268	9.20233	8.65918	16.7716
NM_001178055	PARP8	23.5192	14.2091	22.2048	7.8741	7.56605	29.422	34.1125	40.3271	26.3437	13.4822	23.547	23.5826	10.6253	27.7254	37.0806	8.73585	14.2041	26.7782
NM_018273	TMEM143	5.1525	5.69231	5.73979	5.36352	6.55724	5.56315	4.78385	6.62911	3.89839	3.11705	4.22816	3.2925	5.36979	5.39649	3.33309	4.02867	4.48151	3.05365
NM_198993	STAC2	0	0	0.163994	0	0	0	0	0	0	0	0	0.0823126	0	0	0	0	0	0.187917
NR_073156	HAUS7	2.73398	2.12919	3.70627	1.7498	4.40689	1.60626	1.72955	0.276213	2.99271	1.80263	2.09689	2.42822	2.0946	1.75972	2.03689	2.45961	2.96235	1.87917
NM_005252	FOS	179.216	111.5	76.7492	12.8572	17.3621	332.418	5.15184	11.3247	132.939	12.4306	11.7907	95.7707	16.7568	29.5243	40.136	14.2912	17.1664	111.482
NR_024557	WAC	91.4831	87.2097	61.629	111.797	74.0411	81.606	94.6098	60.4906	75.369	113.453	86.2819	80.049	129.751	139.566	115.455	117.637	109.455	120.925
NR_072985	TMEM254	25.3769	27.549	25.2551	28.9478	13.8313	28.1684	33.2662	12.982	26.3831	27.077	29.494	37.9461	39.4547	37.6581	30.2293	27.395	20.8124	32.6506
NR_002929	LOC148709	0.315459	0.0869055	0.26239	0.304313	0.477856	0.783543	0.735977	1.38106	0.118133	1.08909	1.03126	0.658501	0.41892	0.39105	0.509222	0.72092	1.36724	0.328855
NR_033927	LINC00184	0	0	0	0.0380391	0	0	0	0	0	0	0	0	0.152335	0	0	0.169628	0	0
NM_203295	TRIM7	1.05153	1.04287	0.459183	3.84195	4.83165	0.861897	1.17756	3.86698	0.275644	0.863761	1.20313	1.15238	3.00861	2.89377	0.601808	1.86591	2.73448	0.939584
NM_018296	LRRC36	0.736071	1.17322	1.50875	0.190196	0.159285	0.313417	1.17756	2.2097	0.630044	1.35197	1.78751	0.535032	0.685506	1.6033	0.277758	0.763327	1.13937	0.234896
NM_001161727	PLA2G2A	771.437	1077.11	200.27	123.741	382.205	716.863	62.4844	4.69562	828.625	16.1861	42.4534	268.874	21.7838	8.13384	502.788	41.05	29.7754	369.163
NM_005568	LHX1	0	0	0	0.0380391	0	0	0.110397	0	0	0	0	0	0	0	0	0	0	0
NM_198920	UBE3D	2.62882	3.65003	2.39431	2.85294	5.57498	1.76297	2.68632	7.73396	1.85075	5.44545	2.68127	1.48163	3.12286	3.44124	2.08318	4.53756	4.32959	1.40938
NM_152925	CPNE1	39.9932	31.9378	45.6887	31.3062	34.4587	24.7208	31.4998	29.831	27.0919	34.25	53.591	21.2778	47.6046	42.4289	26.9425	45.3331	49.5244	26.4493
NM_001164246	C1orf27	15.1771	19.0323	15.1203	16.6992	14.7073	22.8403	22.7785	13.5344	26.3831	29.1425	20.6595	22.9241	24.1831	24.2842	24.4427	26.25	23.0152	29.1271
NM_007108	TCEB2	41.5354	34.5884	32.2084	38.3434	29.1757	30.2839	21.7481	29.5548	35.1643	48.0702	30.0783	29.5502	35.075	35.0381	34.1642	26.462	24.9901	23.6305
NM_001161443	SH2D2A	2.41852	3.17205	4.26385	3.00509	1.93797	1.33202	1.43515	1.65728	1.45698	1.38953	1.82189	0.576188	1.59951	1.5642	1.01844	1.10258	2.05086	0.61073
NM_021246	LY6G6D	0.070102	0.564886	3.41108	0.0760783	0.371665	0.313417	2.31833	3.59077	0	2.40351	5.91254	0.246938	8.53074	5.63112	0.879566	3.05331	0.987451	0.140938
NR_028484	ADORA2A-AS1	0.245357	0.173811	0.327988	0.190196	0.371665	0.235063	0.147195	0.276213	0.472533	0.150219	0.103126	0.164625	0.0761673	0	0.185172	0.0424071	0.0759577	0.0939584
NR_022011	PAR-SN	0	0.217264	0.229592	0.152157	0.0530951	0.626834	0.0735977	0.276213	0.196889	0.187774	1.10001	0.535032	0.114251	0.23463	0.78698	0.0848141	0.303831	0.704688
NM_014370	SRPK3	0.105153	0.347622	0.393586	0.646665	1.08845	0.744366	0.735977	1.65728	1.10258	0.751097	1.06563	1.02891	0.952091	0.31284	0.324051	0.508885	0.911493	0.61073
NM_001270449	UBE3B	4.83704	4.86671	4.36224	4.75489	5.52189	7.09106	6.4398	6.90532	5.98541	7.28564	4.12503	4.56835	7.12164	4.57528	8.61049	7.93012	7.3679	6.90595
NM_183237	RNF7	25.9728	26.5931	20.0729	28.3011	26.9988	31.3417	24.8024	17.9538	26.3831	21.256	26.9846	26.5047	27.4583	28.0383	30.4145	19.4224	15.6473	24.3352
NM_001270948	OVOL3	0.420612	0.434528	0.196793	0.45647	0.504403	0.235063	0.404787	0	0.118133	0.112664	0.103126	0.0411563	0.114251	0.351945	0.138879	0.296849	0.303831	0
NM_001098800	MAGED4	1.9278	2.69407	2.06632	1.0651	1.64595	5.09303	1.06717	3.31456	2.04764	0.0751097	4.98441	3.08672	0.571255	0.664785	1.01844	0.551292	0.227873	1.55031
NR_039844	MIR4695	0.105153	0.173811	0.0327988	0.0760783	0.132738	0.0783543	0.0367988	0	0.0787554	0	0.137501	0	0	0	0	0	0	0
NM_147150	PALM2-AKAP2	33.7191	32.7634	46.6071	46.8262	28.2731	26.8755	30.3222	25.6878	46.6232	28.429	44.1034	27.904	17.1757	14.9381	36.0159	18.6591	17.8501	22.9259
NM_001001790	TOMM5	25.7274	30.4169	26.5342	33.4364	82.5628	18.7659	21.3065	15.1917	23.8629	25.9504	32.6221	24.3645	27.1156	19.8653	17.3136	20.1009	19.6731	17.8991
NM_002088	GRIK5	0.035051	0.130358	0.229592	0.266274	0.0796426	0.235063	0	0	0.275644	0.0375548	0.309377	0.288094	0.152335	0	0.231465	0.254442	0.0759577	0
NM_000923	PDE4C	1.01648	0.869055	0.885568	4.29842	2.07071	5.44562	0.257592	1.38106	0.157511	2.02796	1.61564	4.03332	0.457004	1.09494	0.648101	3.47738	5.69683	2.58386
NM_001171136	ZBED1	93.5861	87.5138	90.7871	59.8736	44.2813	77.5707	86.4037	47.5086	58.7516	0	67.1692	55.7256	23.6119	27.0607	18.7949	20.2282	14.356	20.295
NM_002800	PSMB9	46.0921	34.8491	42.9664	31.8768	44.1486	22.4093	11.4444	4.97183	18.35	18.2516	22.3439	14.8163	10.2826	14.7035	28.9331	10.729	10.3303	13.9528
NM_033486	CDK11B	8.58749	12.5144	14.0051	10.1184	10.3004	16.0626	18.9146	33.1456	19.0588	11.1538	10.2782	13.0466	15.1954	15.29	15.1378	12.2132	13.9762	15.5971
NM_001199232	LOC100288255	0	0	0.196793	0	0.0265475	0	0	0	0	0	0	0	0	0	0	0	0	0
NM_001193617	SCP2	144.726	150.129	102.168	112.976	92.1199	174.769	159.707	47.7848	187.95	138.352	163.007	260.108	158.58	166.001	274.054	130.741	92.4406	237.715
NM_001005516	OR5K3	0	0	0	0	0	0	0	0	0	0	0	0	0	0	0	0	0	0
NM_001144070	ABCC3	53.1723	52.2302	52.1173	73.1112	38.2019	65.3475	63.9196	70.7105	79.9368	61.4773	43.7941	62.3518	58.1537	65.6964	61.6622	38.336	35.7761	54.9187
NM_001039651	SAPCD1	1.05153	2.08573	2.32872	1.63568	1.46011	3.52594	3.86388	8.5626	3.58337	2.70395	1.95939	2.83979	1.6376	2.11167	2.54611	3.81664	4.78534	2.255
NM_001252007	PAPOLA	50.5786	56.9666	34.3076	47.5489	65.3069	45.3671	64.398	35.9077	59.5391	64.1812	59.4004	55.8491	52.8601	58.1491	54.209	60.6421	54.3098	56.8918
NM_001164467	DUX4L3	0.315459	0	0	0	0	0	0	0	0	0	0	0	0	0	0	0	0	0
NM_000459	TEK	2.73398	3.56313	4.62463	1.17921	1.91142	1.48873	2.24473	2.2097	2.8352	1.87774	1.65001	2.38707	2.24694	2.11167	2.77758	2.12035	1.29128	0.892605
NM_014005	PCDHA9	0	0.0869055	0.0983964	0	0	0.626834	0	0.276213	0	0	0	0.164625	0.647422	0.351945	0.0462929	0.0424071	0	0
NM_001161619	DUS3L	3.01439	2.60717	5.67419	2.89097	5.57498	3.2517	3.75348	6.62911	3.62275	1.76508	2.68127	2.2636	2.47544	2.69824	2.73128	3.56219	5.54491	1.45636
NM_001098497	SGSM1	0.70102	0.173811	0.426385	0.41843	0.265475	7.01271	9.5677	1.10485	2.04764	1.38953	3.98753	4.44488	1.21868	1.40778	3.9349	0.212035	2.05086	5.77844
NM_001166116	TMOD1	5.60816	6.64827	6.00218	7.56979	9.47747	8.57979	7.10218	3.59077	6.85172	4.54413	8.66256	6.95542	5.10321	4.10602	5.18481	5.76736	5.54491	5.54355
NM_003673	TCAP	0.140204	0	0.0655976	0	0.10619	0.0783543	0	0	0	0	0	0	0.0761673	0	0.185172	0.0848141	0	0.0469792
NR_004390	SNORA57	0.210306	0.260717	0.426385	0.570587	0.690236	0.509303	0.478385	2.2097	0.315022	0.225329	0.240627	0.246938	0.41892	0.195525	0.324051	0.466478	0.303831	0.375834
NM_022458	LMBR1	34.8056	42.6272	40.8673	35.3384	40.3523	26.0528	32.6774	17.1252	24.1779	49.1968	39.2909	29.5091	47.7569	47.2388	28.3776	72.3889	65.0198	33.7311
NM_001048230	ADORA1	0.140204	0.0434528	0.26239	0.45647	0.238928	0.0783543	0.33119	0	0.157511	0.375548	0.0343752	0.246938	0.228502	0.273735	0.0462929	0.169628	0.0759577	0
NM_001146276	NCEH1	55.8713	73.3917	44.4096	50.0975	85.0583	71.6158	32.3462	25.964	63.4375	43.7138	60.2942	94.248	48.4805	50.6019	73.3743	32.2294	24.9141	72.6299
NM_000856	GUCY1A3	5.88857	5.69231	5.83819	4.64077	5.46879	2.97746	4.34226	7.18154	3.38648	2.62884	4.98441	2.88094	3.42753	3.08929	2.03689	2.50202	3.26618	2.91271
NM_001136266	DAZAP2	175.5	194.755	193.775	180.344	128.065	267.619	211.593	132.858	231.226	160.434	217.355	286.489	164.712	177.576	246.556	163.479	150.092	254.111
NM_001184745	PPP1R3F	0.560816	0	0.163994	0.304313	0.292023	0.352594	0.183994	0	0.118133	0	0.171876	0.493876	0	0.351945	0.277758	0.339256	0.911493	0.187917
NM_001244959	FRMD3	2.59377	0.999413	2.39431	3.76587	4.22106	14.3388	16.2283	8.5626	23.4297	5.85855	4.50316	14.1989	1.90418	3.28482	13.1009	2.45961	1.51915	18.134
NR_028386	LOC375196	0	0	0	0.0380391	0	0	0.0735977	0	0	0.0375548	0.343752	0	0	0	0	0	0	0
NM_001193427	SUV39H2	3.92571	3.91075	3.70627	3.53764	9.05271	3.17335	4.41586	4.97183	4.56782	8.63761	5.80942	2.75747	4.72237	4.80991	4.12007	7.93012	7.29194	4.55698
NM_016301	GPN3	5.1525	5.69231	3.64067	4.41254	8.28283	2.82075	4.59986	2.2097	3.93777	7.51097	5.01879	3.04557	9.17816	7.15621	3.9349	8.05734	8.05152	3.80532
NR_045562	GULP1	8.20193	6.86554	4.32944	3.19529	0.663688	4.23113	1.03037	0.828639	2.55955	1.80263	1.13438	4.77413	5.17938	6.72606	5.69403	6.14902	4.93725	4.51001
NM_001199162	USP19	14.6163	12.384	13.3163	11.2215	13.0614	15.3966	13.8364	16.849	11.2227	12.4306	12.1688	13.0054	10.0541	11.6533	11.6658	11.3227	8.8111	10.7113
NR_073082	CRIP2	3.29479	2.25954	3.21428	2.66274	2.81404	1.8805	1.80314	6.3529	2.40204	1.9153	1.85626	1.6051	2.3231	1.52509	1.75913	0.508885	1.74703	0.751668
NM_001105204	RUSC1	21.0306	21.4222	26.6982	30.2411	30.742	39.9215	26.0904	33.4218	42.7248	21.7067	20.6251	40.3743	25.2114	21.1558	39.0712	19.2952	21.572	41.1068
NM_023029	FGFR2	24.5707	28.4181	19.1217	45.8372	8.097	19.236	27.9671	17.9538	12.8765	38.0806	24.5096	22.1833	37.2458	37.8536	23.702	31.1268	31.7503	41.3417
NM_006725	CD6	4.52158	4.04111	7.87171	7.79802	2.76094	3.29088	1.91354	2.2097	3.54399	2.62884	2.47502	1.48163	1.94227	1.99435	2.5924	1.56906	2.88639	1.69125
NM_177990	PAK7	0	0	0	0.0760783	0	0.0783543	0	0	0	0	0	0	0	0	0	0	0	0
NM_001174093	ZEB1	15.6678	14.7739	16.9242	16.509	8.25628	10.3819	11.9228	42.2606	12.9159	11.3791	15.4345	13.7051	15.0811	15.2118	15.1378	9.28715	14.1281	16.7246
NM_003820	TNFRSF14	21.2058	20.6835	25.7799	18.6011	8.12355	32.8696	18.6202	20.9922	20.3189	12.2053	11.6532	20.537	11.387	13.413	15.1841	12.1284	12.6849	14.5166
NM_001164529	ZNF135	0.490714	0.47798	0.754373	0.41843	0.21238	1.13614	0.257592	1.10485	0.708799	0.150219	0.240627	0.78197	0.571255	0.31284	2.31465	0.254442	0	0.892605
NM_033549	TRIM41	7.29061	8.21257	9.18367	6.80901	7.88462	10.8912	7.61736	9.39124	5.86728	7.02275	8.31881	5.67957	9.93983	7.31263	6.99023	7.42124	7.44386	7.65761
NM_018704	CTTNBP2NL	98.4933	95.205	87.1792	97.19	83.0407	121.371	101.638	114.352	127.387	73.0817	84.3569	85.9755	81.9179	87.5952	97.0763	65.9854	63.3487	92.5021
NR_038360	SPTY2D1-AS1	4.94219	4.43218	5.28061	4.67881	5.38915	5.83739	5.40943	1.93349	6.57608	5.55811	5.46566	6.25576	3.84645	4.30155	5.41627	4.57996	3.11427	4.88584
NM_004773	ZNHIT3	13.7049	17.1204	13.0211	11.9062	17.7072	10.6562	14.5723	4.69562	10.2382	15.9984	18.3908	11.071	17.9374	21.5468	10.4622	16.4115	12.6849	8.40928
NM_001198777	CUL2	18.0863	19.293	14.2347	18.7913	26.9457	15.2007	19.4666	11.8772	14.0185	23.8098	19.1126	17.7795	22.317	23.6976	21.0633	23.5359	23.1671	22.3621
NR_073603	ATG12	12.4081	18.1633	9.18367	10.8792	15.4507	11.949	13.5052	17.6776	13.3097	19.3407	17.7376	12.0176	23.2691	20.1782	20.8318	20.3978	24.7622	15.6911
NR_027345	LINC00173	0	0	0.26239	0	0.10619	0	0.0367988	0	0.0787554	0	0.0687505	0	0	0	0	0.508885	0.227873	0
NR_046539	DIAPH3-AS1	0	0.304169	0.0655976	0.0760783	0.371665	0	0	0.552426	0.0787554	0.150219	0.206251	0.0823126	0.228502	0.039105	0.185172	0.212035	0.531704	0.0939584
NM_015975	TAF9B	13.2142	10.0376	9.83964	10.4608	7.69879	8.61897	11.702	8.28639	8.82061	18.5896	15.9845	10.8653	21.4411	17.6363	11.7121	17.0476	14.2041	12.1206
NM_001163264	PCYT1B	0.140204	0	0.0655976	0	0.0796426	0.0783543	0	0	0	0	0.103126	0.0411563	0	0.07821	0.185172	0	0.151915	0.0939584
NM_002383	MAZ	43.8137	33.589	34.7995	32.4854	70.2713	36.0821	46.9553	47.7848	37.9207	44.6527	59.8473	37.8638	53.9645	48.4902	44.4412	47.0718	44.7391	43.1739
NM_005392	PHF2	25.6223	24.8984	23.2872	19.5141	36.6887	26.4054	22.7785	26.7927	22.0515	21.594	28.5658	25.1465	25.516	25.5747	25.5537	22.5606	21.496	29.1741
NM_013255	MKLN1	51.8404	54.4898	59.7922	56.7544	54.0773	59.5493	72.0153	60.2144	53.6718	79.2031	75.1099	69.2661	66.3036	71.0538	66.06	103.643	96.1625	75.6835
NM_003060	SLC22A5	18.0863	16.1644	16.465	14.3027	9.84914	28.756	21.1961	16.849	23.5873	12.3555	11.8938	30.7438	13.4435	13.0611	20.5541	17.4717	11.0898	30.5835
NM_001168412	TSPAN3	87.1368	94.4663	90.8199	145.043	130.189	343.701	148.704	81.759	257.806	96.1404	94.5319	300.235	94.4094	105.036	282.109	95.5431	71.932	285.963
NM_207293	MBNL1	130.53	137.528	118.6	147.972	127.561	144.642	146.423	132.03	200.118	169.71	149.979	156.806	179.488	139.683	168.09	231.373	176.906	186.273
NM_153254	TTLL10	0.35051	0.217264	0.524781	0.114117	0.0530951	0.313417	0	0	0.118133	0	0.0343752	0.0823126	0	0	0.138879	0.381664	0.911493	0.375834
NM_022571	GPR135	0.736071	0.999413	1.11516	1.33137	1.22119	1.56709	0.515184	1.10485	0.354399	0.788651	0.481253	0.987751	0.380837	0.351945	0.277758	1.14499	1.06341	0.657709
NM_001258	CDK3	1.22678	2.43335	2.36151	1.25529	0.902616	2.19392	1.95034	8.28639	1.4176	2.44106	1.51251	2.34591	2.85627	2.3854	1.48137	1.65388	3.11427	2.91271
NM_001098413	GAGE10	0	0	0	0	0	0	0	0	0	0	0	0	0	0	0	0	0	0
NM_001270528	RNF111	29.3026	26.5062	23.32	29.0999	22.9902	25.8177	28.4455	27.0689	31.384	25.8377	27.9471	23.2945	31.0001	28.2338	30.7385	29.4305	28.712	31.8519
NM_001256197	ARAF	6.51948	5.64886	9.34766	8.71096	8.36247	11.949	7.47016	9.66745	9.52941	7.69874	7.28755	9.05439	9.10199	8.68131	11.3881	7.46364	6.22853	10.3824
NM_001001671	MAP3K15	12.0926	14.8174	10.4956	11.4498	10.4863	15.3183	10.5245	3.59077	11.4589	9.08827	11.5501	15.804	11.1585	11.184	14.1193	11.1531	8.05152	18.6977
NR_027129	C21orf67	0.595867	0.347622	0.491982	0	0.185833	0.195886	0.147195	0	0.236266	0.150219	0.137501	0.164625	0.190418	0.117315	0.0925859	0.169628	0.303831	0.140938
NM_001102454	ZNF219	7.71122	8.25602	8.75728	6.08626	3.84939	11.8315	11.7388	14.9155	12.2465	6.42188	9.31569	13.3758	5.48405	7.78189	8.24014	7.67568	10.4822	6.57709
NM_024761	MOB3B	47.459	48.4933	46.8695	54.0536	55.4843	113.261	70.6538	43.6416	80.3306	44.9531	61.0161	134.499	51.0702	49.8589	120.825	56.6558	44.5872	136.522
NM_152334	TARSL2	4.76693	5.5185	5.34621	7.03724	5.22986	5.52398	7.80135	8.28639	3.85902	5.74589	4.46878	4.11563	6.09338	6.92158	3.84231	10.3049	6.38045	4.18115
NR_027997	RDM1	0.280408	0.130358	0.327988	0.152157	0.557498	0.117531	0.0735977	0.276213	0.393777	0.225329	0.137501	0.164625	0.266586	0.430155	0.370344	0.127221	0	0.0939584
NR_046424	C1orf86	6.27413	4.25837	4.03425	3.72784	7.61914	3.99607	4.08467	3.86698	2.20515	3.75548	2.64689	3.21019	2.39927	3.36303	2.03689	2.12035	2.65852	1.97313
NM_001198973	KIAA1522	47.7745	53.2731	46.4431	46.4077	48.1307	82.0369	62.7052	48.3373	64.2251	40.1837	47.1972	68.731	44.2151	45.7919	59.6716	40.5836	33.4214	65.536
NM_174943	C14orf178	0.035051	0.130358	0.0655976	0.114117	0.159285	0.117531	0.110397	0.276213	0.315022	0.0375548	0.0343752	0.123469	0.0761673	0.07821	0.0925859	0	0	0.187917
NM_144663	C11orf40	0	0	0	0	0	0	0	0	0	0	0	0	0	0.039105	0	0	0	0
NM_001918	DBT	28.3913	28.027	26.403	24.6113	24.4768	23.8981	29.6967	14.0869	18.7832	28.3539	35.7846	25.3111	33.0185	35.9375	25.1371	32.9503	28.712	33.7311
NM_024830	LPCAT1	16.6843	16.7728	18.4985	28.6435	46.06	17.2379	14.1676	9.11503	17.5625	9.35115	14.8157	6.5027	12.3772	15.29	4.53671	4.41033	4.93725	7.09386
NM_005367	MAGEA12	0	0	0	0	0	0	0	0	0	0	0	0	0	0	0	0	0	0
NM_001005193	OR7G2	0	0	0	0	0	0	0	0	0	0	0	0	0	0	0	0	0	0
NM_016025	METTL9	45.1457	52.9689	42.8352	43.2125	59.4134	38.041	48.8689	25.964	41.8585	48.9339	49.0535	40.7859	51.4891	63.4674	41.8025	51.6094	44.891	43.6437
NM_207644	FAM211B	2.31337	2.60717	3.77186	2.01607	1.40702	5.71986	4.93104	9.94367	2.4808	3.19216	2.30314	2.96325	1.98035	1.52509	1.2962	2.79887	2.43065	1.31542
NR_024495	BMS1P6	6.30918	7.25661	12.9555	17.0796	9.84914	16.5328	10.4877	58.0047	4.25279	0.150219	20.2814	15.9275	2.0946	2.11167	2.77758	14.0791	33.9531	7.65761
NM_001203245	RPS10	57.8692	56.4451	56.5779	69.6116	58.8028	42.4288	39.8163	18.5063	33.5498	75.4476	71.1568	46.5066	68.2459	53.1437	34.1179	56.9103	57.8038	26.8721
NM_003296	CRISP2	0	0	0.0327988	0	0	0	0	0	0	0	0	0	0	0	0	0	0	0
NM_001195250	APTX	13.4596	14.2525	16.6618	13.9984	33.8216	11.5964	16.4859	11.3247	15.4754	15.2848	14.1282	13.8285	16.9091	18.8877	13.7027	15.9026	15.3435	12.8253
NM_001199328	FPGT	5.11744	6.64827	3.41108	6.54273	4.14142	5.64151	6.73419	4.14319	3.42586	11.8673	8.62819	7.49045	9.90175	7.70368	7.68463	10.5594	9.64663	11.228
NM_002627	PFKP	42.2715	37.1956	31.6836	41.6909	71.7314	29.9705	25.4648	25.4116	53.9475	29.3679	24.8533	43.7492	34.618	40.6301	45.3208	31.5509	23.6988	36.4089
NM_018713	SLC30A10	0.210306	0.304169	0.131195	1.44549	0	8.65815	0	0	7.04861	0.262884	0.0343752	18.6027	0.914008	0	16.2951	0.466478	0	17.4763
NM_014578	RHOD	2.52367	2.47681	2.7879	6.27646	5.9732	5.71986	2.75991	0.828639	7.12737	2.66639	2.30314	6.62617	3.35136	4.34065	3.33309	3.77423	2.05086	3.66438
NR_038238	LOC151484	0.105153	0.260717	0.229592	0	0.0530951	0.156709	0.0367988	0	0.118133	0	0.0687505	0	0	0	0.138879	0	0	0.234896
NM_007099	ACP1	38.9416	47.4504	34.3732	30.2792	53.2544	26.0528	40.2579	21.8208	37.6057	45.8544	53.041	45.6423	43.2249	43.0546	35.1363	35.2827	31.5225	35.5633
NR_048569	ACTR6	3.04944	4.95361	2.36151	3.11921	3.39808	2.54651	3.45909	2.48592	3.70151	7.3983	5.56879	3.74522	8.18799	5.5138	4.99964	10.0081	8.58322	5.40261
NM_001178063	C2	17.7358	12.862	19.5809	10.0423	15.8489	4.07442	3.0911	8.28639	3.03208	11.5669	17.772	2.05782	6.16955	7.0389	3.9349	4.62237	14.1281	2.72479
NM_174887	IFT20	11.5668	13.4704	11.9388	12.4768	17.8665	11.4005	12.5484	11.6009	11.4195	12.8062	12.9595	9.1367	14.2814	16.1504	10.1382	12.9342	12.6849	11.228
NM_001098494	ZNF419	1.19173	1.04287	1.50875	1.52157	0.716783	1.25367	1.36156	1.10485	0.905688	3.60526	2.85315	1.23469	1.06634	1.44688	1.20362	1.90832	4.25363	1.73823
NM_004658	RASAL1	4.41642	4.64944	4.46064	3.99411	2.52202	1.76297	2.64952	11.0485	1.4176	3.71793	3.78128	2.01666	4.76046	5.55291	1.01844	5.25848	6.98811	1.59729
NR_003327	SNORD116-12	0	0	0	0	0	0	0	0	0	0	0	0	0	0	0	0	0	0
NM_003601	SMARCA5	74.7638	81.8215	62.8097	79.2736	57.5551	61.5865	86.4773	34.8028	66.3515	88.9298	70.6068	59.1416	101.303	105.74	72.4947	98.9781	64.1843	82.4485
NM_001097613	GPR89A	12.6885	11.993	9.57725	9.12939	15.663	7.67872	15.2715	16.849	13.5066	5.55811	14.747	11.318	9.90175	9.58072	7.03653	9.6264	7.51982	9.34887
NM_001171818	PPARD	47.8446	38.6295	52.3797	59.4171	114.685	53.9469	34.0021	57.7285	94.5459	23.8098	28.2908	101.121	35.1512	33.3174	84.0217	28.0311	24.7622	74.7909
NM_001254757	ST3GAL4	2.62882	1.26013	6.85495	39.9791	18.9549	58.1389	13.6156	15.7441	114.274	46.4929	31.7971	88.5272	33.0566	49.7806	61.94	7.67568	7.82365	59.7576
NM_178841	RNF166	3.29479	2.95479	4.82142	3.4996	3.21225	2.97746	2.98071	3.59077	4.21342	2.06552	3.40315	2.14013	2.66586	2.42451	2.73128	2.67164	2.35469	2.255
NR_038892	CBR3-AS1	1.89275	2.47681	5.21501	2.66274	2.1238	2.78158	2.57592	3.86698	2.28391	1.9153	3.02502	2.71632	2.05652	2.58093	1.85172	2.96849	2.88639	3.28855
NM_001113495	SEPT9	60.2176	38.1515	62.8097	59.9877	56.4932	39.0988	32.2358	17.9538	69.5411	31.3583	34.3409	43.8726	52.1746	48.06	42.3117	34.4769	32.2061	39.4625
NM_005247	FGF3	0	0	0	0	0	0	0	0	0	0	0	0	0	0	0	0	0	0
NM_001161529	CSF2RA	3.22469	3.2155	3.47667	4.07019	2.01761	1.56709	1.61915	1.10485	4.01653	0	2.40627	2.14013	1.06634	1.5642	1.75913	0.678513	0.607662	1.87917
NM_182523	CMC1	5.04734	7.03935	3.93586	5.81999	5.46879	7.52201	4.59986	3.86698	7.32426	9.42626	8.21568	7.86086	12.0725	10.2455	12.962	7.88771	5.31704	11.8857
NR_002948	KLKP1	0	0	0	0	0	0.195886	0	0	0	0	0	0.0823126	0	0	0	0	0	0.328855
NM_001146206	RASGRP4	1.50719	0.434528	2.23032	0.8749	0.265475	0.744366	0.478385	0.552426	0.86631	0.337993	0.790631	0.78197	0.761673	0.586575	1.48137	0.932955	0.987451	1.55031
NM_004931	CD8B	2.38347	2.95479	1.67274	2.13019	1.08845	1.17531	1.87674	0.276213	3.03208	0.638432	0.412503	0.32925	0.228502	0.46926	0.694394	1.10258	0.911493	0.140938
NM_002732	PRKACG	0.105153	0	0.0655976	0	0.0796426	0	0	0.552426	0.0787554	0	0.0343752	0	0.0380837	0.07821	0	0.0424071	0	0.0939584
NM_004640	DDX39B	62.0403	52.0999	71.3046	59.6073	67.0856	47.2085	48.5745	62.7003	58.1609	73.4197	55.7566	60.3763	69.5407	68.1209	71.3837	80.531	68.8937	74.7909
NR_031705	MIR664	0.035051	0	0	0	0	0	0.0735977	0	0.118133	0.0375548	0	0.0411563	0	0	0.0462929	0	0.151915	0.0469792
NM_024771	NAA40	5.4329	6.08339	5.5758	7.07528	10.9641	11.3222	8.72133	17.4014	9.29314	7.8114	7.18443	14.4459	8.22607	6.17859	13.0083	8.18456	7.8996	14.3287
NM_003839	TNFRSF11A	28.1459	32.2419	18.6953	27.4262	15.3445	44.8186	38.2708	37.565	35.6762	32.9356	25.1627	37.5757	30.962	32.2225	31.6181	17.811	16.9386	27.6708
NR_047525	LOC643837	12.0926	10.2983	12.6931	12.2486	21.8486	13.5945	12.438	11.0485	11.7739	12.5809	10.3469	12.5938	10.7396	7.8601	12.4528	9.54159	9.49472	12.1206
NR_027232	LINC00685	0	0.260717	0.131195	0	0	0	0.147195	0.552426	0	0	0.0687505	0.493876	0	0.039105	0.0925859	0	0.151915	0
NM_001099405	SCN5A	0.105153	0.0869055	0.26239	0.228235	0.292023	0.391771	0.220793	0.276213	0.0393777	0.0751097	0.275002	0.164625	0.0761673	0.07821	0.277758	0.0424071	0	0.281875
NM_001276254	IFNL4	0	0	0	0	0	0	0	0	0	0	0	0	0	0	0	0	0	0
NM_004673	ANGPTL1	1.15668	1.08632	1.21356	1.0651	0.849521	4.23113	3.0911	6.07669	4.84346	2.51617	1.78751	4.73298	1.18059	0.664785	3.98119	2.75646	3.79789	3.57042
NM_001078174	SLC29A1	36.6984	31.1556	22.2376	17.7643	38.5736	7.01271	27.7831	22.9257	12.5221	33.9496	28.8065	9.21901	38.4645	46.1439	8.70307	27.8614	24.9141	8.3623
NM_005161	APLNR	8.58749	10.559	15.153	7.11332	6.95545	4.89714	7.94855	4.41941	5.07973	4.28125	8.55944	8.23126	4.4177	5.31828	7.73092	4.66478	7.06407	3.19459
NM_080747	KRT72	0	0	0.163994	0	0	0.0783543	0	0	0	0	0	0.0823126	0	0	0	0	0	0
NM_003559	PIP4K2B	24.4656	27.3318	32.274	32.9799	52.8561	22.6052	33.7445	33.9742	20.5158	28.4666	32.6221	24.7349	28.1057	30.8147	23.9335	29.7273	26.2814	15.6911
NM_203304	MEX3D	3.92571	2.91133	1.63994	3.46156	5.04403	1.17531	2.42872	1.10485	1.96889	1.95285	2.37189	1.48163	2.51352	1.68151	1.66655	3.73182	4.55746	0.892605
NM_001082486	ACD	3.99581	3.08515	4.42784	5.0592	5.3626	2.46816	3.2751	6.62911	3.66213	4.73191	3.36877	2.42822	5.36979	5.24007	2.03689	5.17366	5.31704	2.91271
NR_029378	LOC100289511	2.48862	2.25954	1.63994	3.57568	2.41583	4.1136	2.87031	3.59077	5.98541	1.12664	1.89064	3.08672	0.990175	0.977625	2.22206	0.678513	0.0759577	2.4899
NM_001145049	GPN1	15.3874	15.7299	14.6939	10.9553	17.0435	11.1263	13.6156	8.83882	11.4589	16.5992	14.472	14.0343	14.0529	18.1447	10.9714	15.3089	12.6849	13.53
NR_073153	DEFB119	0	0	0	0	0	0	0	0	0	0	0	0	0	0	0	0	0	0
NR_003140	SNORD117	0.035051	0	0.196793	0.0760783	0.0265475	0.156709	0.0735977	0	0.0787554	0.300439	0.137501	0.0823126	0.0380837	0	0.0925859	0.0424071	0.0759577	0
NM_173358	SSX7	0	0	0.0327988	0.0380391	0.0265475	0	0	0	0	0	0	0	0	0	0	0	0	0
NM_018989	RBM27	45.6013	44.0176	42.0481	49.4509	46.4847	34.2408	42.7603	32.8693	40.9135	56.5576	46.9222	42.8849	57.9633	55.49	49.3483	64.7556	65.7794	62.8582
NM_031429	RTBDN	0	0.130358	0.196793	0.836861	0.159285	0.0391771	0.147195	0	0	0	0	0.205782	0	0	0.0925859	0.127221	1.4432	0.187917
NM_005365	MAGEA9	0	0	0	0	0	0	0	0	0	0	0	0	0	0	0	0	0	0
NM_001243202	RANBP6	6.9401	7.56078	7.47813	8.14037	20.946	8.77568	9.75169	8.01018	9.21439	13.9328	8.14693	6.8731	8.94966	7.93831	9.58264	11.7892	7.44386	10.0066
NM_001271098	PUF60	26.9893	21.9871	26.3046	19.5141	30.4766	24.2898	19.4298	10.4961	21.7759	20.9556	25.0596	21.4424	18.2802	16.2677	17.8691	19.8889	21.1922	16.9595
NM_203288	RP9	3.11954	2.86788	4.19825	3.6898	2.97332	2.78158	3.2751	5.52426	2.75644	4.76946	4.70941	3.08672	4.34154	3.36303	1.75913	5.47051	5.62087	2.67782
NM_001013836	MAD1L1	3.01439	3.04169	4.29664	2.54862	3.63701	1.84133	1.69275	2.48592	2.44142	1.84019	2.06251	2.30475	1.82802	1.40778	3.24051	2.96849	4.55746	2.81875
NM_001199803	CENPO	16.7193	18.0763	17.5146	17.46	33.6092	10.8521	12.1436	14.0869	12.3252	16.111	16.5345	10.7006	15.5762	12.5136	9.67522	18.7863	13.4445	7.18782
NM_001197219	PDE4D	27.2346	25.8978	32.0772	19.1337	14.9728	39.9999	25.2808	27.0689	61.5868	18.2141	21.8627	32.2665	24.9829	26.5132	44.7653	22.9846	22.4075	42.0934
NR_003341	SNORD116-27	0	0	0	0	0	0	0	0	0	0	0	0	0	0	0	0	0	0
NM_001171876	MCF2	0	0	0	0.0380391	0.0265475	0	0.0735977	0	0.236266	0	0.0343752	0.0823126	0	0	0	0	0	0
NR_027006	LOC400891	0	0.0434528	0	0.114117	0	0.0391771	0	0	0	0	0	0	0	0	0.185172	0	0.151915	0.0939584
NM_001146103	PARP9	39.888	40.2373	34.4715	27.5784	53.918	23.7413	16.7435	6.3529	24.808	10.7782	19.1814	20.4547	13.1769	16.4241	28.1924	13.9095	18.1539	17.1944
NM_001166283	RGMA	0.630918	0.391075	1.70554	1.90196	0.477856	0.861897	0.883172	0	0.630044	0.300439	0.137501	2.34591	0.647422	0.430155	2.17577	0.466478	0.151915	0.986564
NM_138691	TMC1	0	0	0.0655976	0	0.0265475	0.156709	0	0	0.0393777	0.0375548	0	0	0	0	0	0.0424071	0.303831	0.0469792
NR_046796	SYNJ2-IT1	0.105153	0.0434528	0	0.114117	0.159285	0.235063	0.147195	0.828639	0.0393777	0.0375548	0.0687505	0.164625	0	0.039105	0.231465	0.424071	0.455746	0.187917
NM_004049	BCL2A1	2.17316	1.47739	3.08309	3.08117	1.32738	0.391771	0.588781	0	0.945065	0.675987	0.584379	0.452719	0.571255	0.70389	0.509222	0.593699	1.89894	0.516771
NM_001005491	OR10AG1	0	0	0	0	0	0	0	0	0	0	0	0	0	0	0	0	0	0
NM_001198843	RBM4	18.4368	16.9031	16.2682	15.8623	14.2029	16.0235	18.657	12.7058	14.0578	14.3084	17.0157	15.8452	14.4337	16.8151	14.536	12.6797	9.95046	12.7783
NM_001122819	KIF17	0.105153	0	0.163994	0.266274	0.424761	0.27424	0.147195	0	0.157511	0	0	0.205782	0.0380837	0	0	0	0	0.140938
NM_001008485	SLC41A3	9.04316	6.21374	6.75655	9.92821	5.04403	5.13221	8.05895	6.90532	4.92222	7.17297	9.41882	5.59726	13.2531	12.0443	3.56456	5.47051	5.69683	5.96636
NM_001136497	BTF3L4	31.3005	34.936	23.7135	35.8709	38.0957	21.1948	29.4391	24.8592	20.3977	41.3103	33.9627	22.4713	43.7962	37.2671	20.23	38.1664	41.321	24.7581
NM_020374	C12orf4	8.8679	9.90723	7.80612	12.5149	12.0526	11.8315	10.1933	12.7058	7.12737	11.1913	14.1282	10.001	11.0443	11.8488	13.2861	17.1749	17.6982	11.416
NM_001012715	C9orf106	0.070102	0	0	0.0380391	0.0530951	0.0783543	0	0	0.118133	0	0	0	0	0	0	0	0	0
NM_001193513	SLC30A6	25.5171	27.2883	22.3032	28.6815	41.5469	26.4446	28.2615	14.0869	27.4069	37.8928	31.4877	32.7193	28.8674	30.8147	29.9978	28.752	28.1044	30.6305
NM_001206612	CHTOP	49.7023	38.586	45.0328	41.4246	56.6259	36.043	39.7059	48.8897	42.0948	56.7829	48.4003	43.7903	48.9756	51.3057	52.311	51.779	42.6123	45.0531
NM_001256533	MSTO1	11.1462	8.12567	11.6108	6.1243	8.6545	6.30752	7.76456	6.07669	8.03306	2.85417	5.87817	6.2146	4.34154	3.9496	4.62929	3.90145	5.01321	6.01334
NM_194429	FGFR1OP	5.67826	8.38638	5.90379	4.86901	9.58366	7.24777	8.02215	11.3247	8.15119	7.21053	6.84067	6.25576	7.31206	7.35174	8.56419	8.73585	7.97556	10.3354
NR_037416	MIR3621	0.946377	0.521433	0.655976	0.684704	0.663688	1.56709	1.36156	0.828639	0.945065	0.0375548	1.65001	1.23469	0.0380837	0.039105	0	0.0848141	0	0.0469792
NR_033872	PCBP1-AS1	0.35051	0.391075	0.623177	0.380391	0.584046	1.09696	0.662379	1.38106	0.748177	0.600877	0.65313	0.493876	0.457004	0.70389	0.740687	0.763327	0.607662	0.469792
NM_001136257	SGMS2	43.9189	46.929	31.1917	44.8101	45.237	39.6081	45.9618	24.8592	49.4978	32.6727	41.319	38.6046	39.1119	48.4902	44.9504	47.3687	33.1935	49.3752
NM_138282	ATP6V1G2	0.280408	0.0434528	0.327988	0.570587	0.10619	0.509303	0.0367988	0.552426	0.0393777	0.225329	0.687505	0.452719	0.304669	0.039105	0.370344	0	0	0.281875
NM_000386	BLMH	12.1977	11.2108	10.7908	10.4608	16.9904	8.18802	9.71489	9.66745	12.1283	11.1162	7.90631	7.12004	10.7015	11.536	9.02712	8.35419	14.1281	7.14084
NM_030629	CMIP	28.0057	25.0722	29.1581	22.5572	16.3267	25.4651	24.324	53.8615	28.3913	25.5373	23.9595	24.0353	25.8207	25.4182	22.6372	23.96	38.5865	22.8789
NM_007005	TLE4	21.1007	19.5972	21.4504	16.509	13.4596	10.4211	16.6699	15.1917	11.8133	19.9041	10.7251	10.2891	25.516	29.9935	13.3787	11.8316	19.4452	17.3353
NM_001003927	EVI2A	3.5752	3.43277	4.00145	5.81999	2.44237	2.70322	2.83351	3.03834	5.04035	4.54413	3.64378	3.41597	2.47544	1.6033	4.583	3.09572	4.70938	6.1073
NM_001195604	SEPHS1	16.1585	18.6412	17.0882	15.6341	18.0258	14.2213	17.5898	18.5063	14.0185	18.6647	21.897	17.5326	19.4988	17.0889	17.3599	20.9491	21.3441	16.2548
NM_002968	SALL1	8.34214	6.03993	7.70772	4.52666	2.60166	5.17138	6.4398	14.0869	3.42586	4.6568	5.39691	6.17345	4.03687	3.32392	3.9349	1.2298	2.35469	3.71136
NM_001099639	ZNF146	32.4923	41.6712	30.7325	60.2159	68.1741	29.6963	39.8899	30.3834	24.7686	50.7366	47.4378	29.1387	55.3736	53.261	28.3313	75.951	71.7801	37.1606
NM_001163813	C10orf2	7.11535	6.69172	7.51093	3.87999	13.7782	2.7424	3.64309	4.14319	3.78026	9.05071	8.18131	4.8976	7.35014	6.99979	2.68499	8.65104	8.05152	2.58386
NM_001722	POLR3D	8.37719	7.60423	9.57725	5.32548	10.0615	8.26638	8.83172	3.03834	7.12737	8.75027	8.14693	6.42038	7.61673	8.56399	8.10126	11.0258	14.5079	6.71803
NM_006781	C6orf10	0	0	0	0.0380391	0	0.0391771	0	0	0	0	0.0687505	0	0	0	0	0	0.151915	0
NM_003718	CDK13	37.119	37.3259	45.2952	42.9842	42.9008	45.4847	39.0804	35.9077	32.3291	41.2352	40.1503	40.0039	38.8834	37.1106	37.4047	62.7625	63.3487	47.2141
NM_025153	ATP10B	472.592	393.812	381.45	482.641	341.162	453.71	490.013	214.617	331.679	295.519	365.271	347.483	300.366	341.856	360.622	285.569	234.861	400.451
NM_020899	ZBTB4	53.8383	43.192	48.0831	61.3952	45.3432	43.4866	82.9814	52.7567	30.4784	63.5803	55.6535	37.6992	52.4412	61.082	32.1273	45.63	47.8534	33.7311
NR_039922	MIR4765	0	0	0	0	0	0	0	0	0	0	0	0	0	0	0	0	0	0
NM_018646	TRPV6	0.105153	0.217264	0.131195	0.152157	0.265475	0.117531	0	0	0.157511	0	0.0343752	0.123469	0.0761673	0.117315	0.0925859	0.212035	1.4432	0.0939584
NM_000554	CRX	0	0	0	0	0	0	0	0	0	0	0.0687505	0	0	0	0	0	0	0
NM_004261	SEP15	75.3947	97.03	61.4322	68.8889	77.4392	75.6902	91.0035	23.4781	107.541	100.497	86.9694	98.3224	101.112	94.6341	114.714	80.4886	66.6149	110.025
NR_003352	SNORD115-37	0	0	0	0	0	0	0	0	0	0	0	0	0	0	0	0	0	0
NR_045587	SRA1	6.27413	6.77863	8.88848	3.53764	6.90236	9.5984	7.58056	8.28639	12.7584	4.05592	6.84067	10.7418	6.70272	5.43559	12.0825	4.36793	4.02576	8.87907
NR_002710	ALOX12P2	0.105153	0.0869055	0.0983964	0.190196	0.690236	0.430949	0.147195	0.276213	0.590666	0.112664	0.206251	0.123469	0.0380837	0.07821	0.138879	0.0424071	0.911493	0.0939584
NM_003947	KALRN	0.560816	0.434528	1.21356	1.59764	0.849521	4.66208	7.32297	18.2301	4.52844	4.73191	1.95939	4.77413	0.990175	1.21225	6.75877	0.636106	0.68362	5.02678
NM_004345	CAMP	0	0.0869055	0.0655976	0.152157	0	0.195886	0	0	0.0787554	0	0	0	0	0	0	0.0848141	0	0.0939584
NM_001197113	IQCJ-SCHIP1	0.245357	0.217264	0.393586	0.380391	0.21238	0.352594	0.588781	0	1.29946	0.300439	0.412503	0.740814	0.41892	0.508365	0.370344	0.169628	0.303831	0.516771
NM_001193654	C17orf62	22.2574	18.9019	24.0415	23.5462	14.548	23.2712	13.8732	16.5728	16.6568	12.3931	13.922	16.4214	9.10199	10.7539	8.98083	9.584	8.88705	9.02001
NM_001258254	UTY	23.0636	20.727	20.7288	0.114117	0	0	35.4741	59.3858	27.6038	35.3391	31.2127	25.5581	0.0761673	0	0.185172	34.2225	39.2701	38.429
NM_032334	UTP23	11.3916	13.0793	11.1188	9.73802	12.265	7.63954	11.7388	9.39124	6.73359	14.4586	13.3032	8.39589	10.8919	11.3013	8.65678	16.4115	14.5079	10.3354
NM_001167880	LHPP	6.27413	4.73635	5.93658	5.81999	1.83178	4.03525	3.34869	4.41941	5.00097	4.09348	5.19066	4.56835	3.65603	4.61439	3.47197	1.86591	2.05086	1.45636
NM_001042483	NUPR1	41.9911	39.064	13.7755	11.8682	14.8135	54.1036	43.9746	34.2504	30.4784	9.20093	39.4972	59.6355	29.8957	31.2449	48.6076	12.2556	7.06407	50.9255
NM_015320	ARHGEF4	0	0.173811	0.131195	0.532548	1.43357	0.470126	0.183994	0.552426	0.551288	0.0751097	0.584379	0.32925	0.190418	0.039105	0	0.169628	1.59511	0.281875
NM_021021	SNTB1	21.6615	25.4199	22.6968	19.9705	16.9373	3.95689	11.5916	30.6596	3.66213	22.9836	17.6001	7.57276	29.6672	28.7422	6.34213	28.964	32.434	9.34887
NM_001014449	DDX19B	12.8988	13.9483	12.9227	12.4388	8.17664	13.0852	11.9596	10.2199	12.4827	10.4778	13.6813	11.6472	12.6438	15.5638	10.5085	10.6866	9.49472	14.9394
NM_001166700	FAM104B	3.39995	3.91075	3.44387	4.1843	2.97332	5.36727	5.15184	6.07669	3.97715	4.91968	6.05004	7.07889	3.61795	5.31828	6.29584	3.77423	3.64597	6.71803
NM_152511	DUSP18	30.2841	25.7675	29.8469	28.3772	24.9547	18.6875	22.3369	40.6033	10.4745	29.4054	31.1783	14.8163	27.3441	36.7587	13.3787	37.8695	34.4848	14.4226
NM_007033	RER1	56.5723	53.8814	63.4657	50.4779	52.4314	80.274	63.6252	45.5751	68.1235	52.2012	42.5909	81.2837	57.2778	52.7135	68.4673	49.7859	37.9029	69.7641
NM_130782	RGS18	2.38347	2.21609	2.42711	2.01607	0.530951	1.21449	0.846373	0.552426	0.905688	1.35197	1.44376	1.02891	1.37101	1.13404	1.06474	1.86591	2.73448	1.50334
NM_001267612	GPR161	1.75255	1.91192	2.03353	1.82588	6.13248	9.24581	6.07181	10.4961	7.99368	4.54413	2.54377	9.01323	1.94227	1.91614	11.6195	1.39943	2.05086	11.9797
NM_173627	ENDOV	1.22678	1.43394	1.47595	1.82588	1.67249	4.6229	1.61915	0	1.18133	2.77906	1.99376	4.36257	1.71376	1.13404	2.22206	0.763327	1.51915	1.92615
NM_001166226	CEP120	12.7586	15.2085	11.4796	12.8572	12.4773	10.3819	11.1868	15.1917	11.1045	19.5661	13.4407	9.71289	16.7568	14.3906	10.6937	21.1187	16.7867	13.0602
NM_003876	TMEM11	18.1915	18.2067	19.4169	14.0364	23.2822	16.1018	13.91	9.66745	21.894	12.3555	18.322	17.0799	12.2249	10.0891	14.9526	10.0929	10.9379	14.7045
NM_001009565	CDKL4	0.035051	0.0434528	0.163994	0.152157	0.0265475	0	0.0367988	0	0	0.150219	0.171876	0	0	0.039105	0	0	0.227873	0
NM_013267	GLS2	0.771122	1.26013	1.70554	1.94	2.54856	0.82272	1.61915	1.93349	1.22071	1.76508	0.996882	0.864283	3.69411	2.89377	0.509222	3.73182	5.69683	0.892605
NR_036506	PPIAP30	0.070102	0	0.0655976	0	0	0	0	0.276213	0.0787554	0	0	0.0823126	0.0761673	0	0.185172	0.0848141	0	0
NM_182962	BIRC3	42.9024	35.8485	35.5539	49.2607	30.5031	37.7276	17.921	42.5368	51.3485	18.5521	20.0751	17.4914	14.3956	16.5414	24.026	16.4963	14.2041	24.1473
NM_001002858	ANXA2	232.598	198.188	228.149	320.251	403.098	135.631	142.338	113.8	332.781	238.548	175.142	178.413	293.968	339.979	213.827	191.256	115	190.172
NM_017747	ANKHD1	136.138	120.277	129.457	148.505	129.446	127.953	153.856	195.006	118.291	156.04	148.054	130.877	163.836	172.14	145.869	160.341	209.871	173.212
NM_003571	BFSP2	0.210306	0	0.131195	0.570587	0.185833	0	0.0735977	0	0.275644	0	0.0343752	0.0823126	0.114251	0	0	0.0424071	0	0.0469792
NM_017446	MRPL39	8.65759	11.993	11.578	10.7651	13.7782	11.2438	10.5245	3.59077	13.1128	37.0666	12.3751	12.5938	28.8674	17.4017	13.6101	31.3812	18.0779	17.5233
NM_032714	INF2	21.8718	16.0341	19.7121	17.0415	17.893	22.4877	17.5898	16.0204	29.9664	10.2525	17.8408	20.8251	11.4251	13.6867	18.5635	10.1353	7.14003	16.5837
NM_001008778	SPDYC	0	0	0.131195	0	0.0530951	0.156709	0	0	0.118133	0.225329	0.103126	0	0.114251	0.15642	0	0	0	0.0469792
NM_001143989	NBPF4	6.09887	3.99765	4.88702	2.05411	0.292023	1.52791	6.55019	3.86698	0.826932	0.0751097	0.65313	0.987751	0.457004	1.68151	0.925859	0.975362	3.4181	0.469792
NR_024052	HCG18	14.3008	17.0769	15.0875	13.1615	9.47747	15.4358	24.508	20.716	12.0102	17.3879	13.2688	13.952	14.3575	16.5805	11.9436	23.5359	24.9901	16.1139
NR_033420	SH3GL1P2	0.035051	0.0434528	0.295189	0.266274	0.31857	0.509303	0.588781	3.31456	0.551288	0.187774	0.412503	0.164625	0.342753	0.39105	0.879566	0.254442	0.68362	0.516771
NM_002514	NOV	2.62882	1.99883	2.8535	2.96705	2.84059	8.93239	3.1279	0.552426	4.52844	9.91447	9.59069	11.853	5.90297	6.56964	5.97179	2.24757	1.21532	10.0536
NM_153765	KCNJ1	0.070102	0.0869055	0	0.0760783	0	0	0	0	0.0787554	0	0	0	0	0.15642	0	0	0	0
NM_001098477	GRSF1	46.1622	63.6583	45.6231	35.2242	34.4056	38.4328	50.8192	29.0024	46.9382	78.3018	53.3848	59.9236	80.9658	80.6345	65.0416	72.2192	58.8672	67.9789
NM_007145	ZNF146	32.6675	42.0188	30.9293	60.7485	68.7847	29.8138	40.2211	30.6596	24.9655	50.9995	47.6097	29.5502	55.526	53.5347	28.4239	76.1631	72.0839	37.2545
NM_001113182	BRD2	97.8273	93.9014	102.234	100.652	110.252	104.133	96.8545	82.3115	100.768	92.0844	98.0038	93.3837	89.4966	92.8352	109.807	98.8933	90.3897	109.509
NM_001253801	ZNF331	2.10306	1.95537	3.05029	1.90196	1.48666	5.21056	0.95677	1.10485	2.79582	1.05154	3.54065	3.5806	1.48526	0.821205	4.583	0.890548	0.303831	3.99323
NR_026680	MGC57346	3.99581	2.08573	3.08309	4.94509	8.91997	2.93829	3.2015	4.14319	2.8352	4.43147	4.88128	3.45713	3.23711	3.28482	2.6387	5.00403	2.43065	2.58386
NM_006552	SCGB1D1	0	0	0	0	0	0	0	0	0	0	0	0	0	0	0	0	0	0
NM_001141969	DAXX	29.4428	32.6765	34.3732	32.2572	40.0071	30.4406	33.7813	27.3451	33.8648	34.1749	36.7128	32.5958	36.6365	44.6188	28.8868	28.8368	29.9273	34.2009
NM_031218	ZNF93	2.38347	1.30358	5.01822	3.6898	0.822974	5.40645	1.50875	0.552426	5.39475	6.6472	10.4844	4.28026	5.36979	2.54182	4.81447	2.33239	1.06341	5.77844
NM_001005175	OR52N4	0	0	0	0.0760783	0	0	0	0	0	0	0.0687505	0.123469	0	0	0.0925859	0	0	0
NR_036140	MIR3179-1	0	0	0	0	0	0	0	0	0	0	0	0.0823126	0	0	0	0	0	0
NR_040677	LOC100507577	9.11326	9.64651	10.266	8.33057	10.2739	11.2438	11.5916	9.66745	10.1988	8.67517	10.0376	12.1823	7.54056	9.11146	10.3696	9.66881	9.41876	10.0066
NM_001040437	C6orf48	45.356	38.673	49.0014	32.7897	33.0517	16.8462	38.4916	30.1072	20.7521	43.8265	53.5223	17.4503	58.6869	67.417	19.8134	56.9103	90.5416	20.5769
NM_206809	MOG	0	0	0	0	0	0	0	0	0	0	0	0	0	0	0	0	0	0
NM_052879	LARP4	37.6097	41.7581	38.309	34.6917	50.2014	35.9254	37.3508	49.7183	35.4399	45.8544	44.1034	51.5277	47.795	43.9931	54.209	76.1207	83.3256	67.4622
NR_026915	LOC201651	0.876275	0.955961	0.623177	0.684704	0.185833	0.391771	1.91354	0.276213	0.551288	1.38953	0.65313	0.288094	1.48526	1.64241	0.925859	2.24757	2.12682	0.704688
NR_002824	HERC2P2	34.5603	37.8908	31.1261	22.6333	24.3972	37.4142	29.0711	132.858	22.7209	6.91009	15.0907	20.2077	13.0627	14.1169	16.0174	34.2225	48.6129	34.3888
NR_027241	LOC388796	8.90295	9.4727	8.52769	18.7153	32.9455	8.85403	16.4859	10.2199	14.2154	20.6927	17.3251	11.8942	19.8035	19.9435	11.4806	16.0723	20.3567	5.35563
NM_021916	ZNF70	6.27413	4.91016	5.80539	6.46665	3.69011	4.9755	5.37263	4.14319	5.43413	6.19655	6.63442	6.09113	5.5983	4.26244	4.99964	4.11348	5.62087	4.32209
NM_001270444	RTBDN	0	0.130358	0.196793	0.760783	0.159285	0.0391771	0.147195	0	0	0	0	0.164625	0	0	0.0925859	0.127221	1.4432	0.187917
NM_001135110	DNAJA3	29.6181	35.0229	30.5357	16.4709	21.8221	21.4691	30.911	14.9155	24.3354	29.1425	32.1409	30.1676	29.3244	25.4965	21.017	31.1692	33.8771	25.9325
NM_199135	FOXD4L3	0.175255	0.347622	0.491982	0.304313	0.345118	0.117531	0.220793	0.552426	0.157511	0	0	0	0.152335	0.039105	0.0925859	0.0848141	0.151915	0.140938
NM_138422	ADAT3	2.34842	1.78156	1.83673	1.59764	3.2388	4.23113	1.65595	0.552426	2.8352	0.525768	1.61564	2.18128	0.647422	0.7821	1.85172	1.44184	1.4432	1.3624
NM_001184776	SEZ6L	0.140204	0.0869055	0.163994	0.114117	0	0.235063	0.0367988	0	0	0.0751097	0.103126	0.123469	0.0761673	0.07821	0.0462929	0.0848141	0	0.0939584
NM_020475	ANK1	0.35051	0.173811	0.951165	0.989017	0.637141	0.195886	0.257592	0	0.590666	0.300439	0.206251	0.370407	0	0.23463	0.0925859	0.381664	0.455746	0.281875
NM_001513	GSTZ1	5.99372	4.7798	6.82215	2.09215	1.53976	3.33006	3.86388	2.2097	5.39475	2.55373	3.6094	4.07447	5.56021	6.21769	4.53671	3.47738	3.11427	3.71136
NM_198868	TBC1D9B	44.3746	40.6283	46.6727	47.2066	43.8034	53.3201	43.901	30.1072	42.1735	29.1801	39.9097	45.807	27.3441	29.9153	28.0535	35.6643	35.7761	35.4223
NM_001142604	PPT1	32.4923	31.0687	31.2573	31.5344	46.2724	20.3329	24.3976	6.3529	16.8143	27.7906	33.9971	15.8452	42.4252	44.8534	20.5078	27.0981	24.0026	15.1743
NM_012218	ILF3	86.7862	81.6477	89.4424	72.5406	133.454	50.7736	76.6888	82.5877	66.6665	86.6014	71.5349	61.611	74.644	78.0536	63.4676	113.481	119.557	55.2006
NM_032971	PCDH11Y	0.245357	0.0869055	1.24635	0.0760783	0.0265475	0.0783543	0.147195	0	1.85075	0	0.206251	1.48163	0	0	0	0.381664	0	0.845626
NM_198480	ZNF615	4.13602	3.51967	3.93586	2.47254	1.48666	9.63758	7.98535	2.76213	5.74915	7.32319	7.6313	6.17345	9.36858	5.24007	6.99023	3.56219	5.08917	7.51668
NM_012173	FBXO25	14.0204	14.2091	10.3644	10.689	13.8844	19.0009	26.2376	8.01018	21.3821	17.2001	12.8563	23.7883	15.9951	17.9492	19.1653	16.7932	13.5205	23.6775
NM_001042453	MST4	11.1462	17.0335	7.18294	11.0694	14.9728	9.63758	9.01572	7.18154	9.33252	19.0027	13.1313	13.2112	14.7003	9.85446	7.31428	13.8247	13.9003	14.3756
NM_015088	TNRC6B	131.301	113.281	104.989	146.222	90.8988	131.008	149.992	172.633	103.8	136.812	136.47	116.596	116.536	131.197	110.409	130.02	140.75	136.85
NM_024741	ZNF408	3.54015	3.1286	4.52624	4.33646	3.71665	3.44759	4.45266	5.24805	5.00097	3.00439	3.0594	2.46938	1.8661	2.77645	1.43508	2.07795	3.26618	2.77177
NM_001166434	ITIH1	0	0	0	0	0.0265475	0	0	0	0.0393777	0	0	0	0	0.15642	0.0925859	0.0424071	0	0.140938
NM_005317	GZMM	0.981428	0.260717	0.623177	0.45647	0.292023	0.235063	0.110397	0	1.14195	0.262884	0.0343752	0.164625	0.0761673	0.07821	0.185172	0.127221	0.151915	0.0939584
NR_033379	LOC401242	0	0	0	0	0	0	0	0	0	0	0.103126	0	0	0.039105	0	0	0	0
NM_001256690	MELK	7.67617	11.037	8.92128	7.68391	51.635	2.66405	4.19507	4.69562	11.7346	14.9093	14.0251	8.68398	15.6143	10.3237	13.7953	21.9669	17.4703	7.70459
NM_002151	HPN	0.420612	1.43394	0.459183	0	0.0796426	1.44955	2.64952	3.31456	1.0632	1.53975	3.4719	0.658501	1.21868	3.87139	0.925859	0.424071	2.43065	0.469792
NM_001002026	CLDN18	0.385561	0.912508	0.131195	0.494509	1.40702	0.0391771	0.147195	0.276213	0.157511	0.0751097	0.0343752	0.0823126	0	0.23463	0.0925859	0.169628	8.58322	0
NM_198827	GPR133	0.70102	0.521433	0.81997	0.494509	0.610593	1.21449	1.14076	0.552426	1.22071	0.525768	0.309377	0.78197	0.190418	0.273735	1.20362	0.424071	0.911493	0.563751
NR_003142	SNHG9	0.210306	0.260717	0.360787	0.266274	0.371665	0.470126	0.294391	2.2097	0.393777	0.713542	0.378128	0.411563	0.571255	0.31284	0.231465	0.975362	0.68362	0.375834
NM_003449	TRIM26	44.5849	41.367	42.1465	40.5878	54.6879	37.6101	36.1733	38.3936	38.7083	27.5277	41.6284	40.3332	33.1328	29.9153	38.3768	36.979	32.0542	30.3956
NM_002788	PSMA3	36.2778	36.2831	25.9439	26.6274	43.7769	20.6464	22.9993	13.8106	35.9912	43.5636	32.8627	26.4224	43.9866	42.6244	50.1815	42.4919	34.5608	40.0733
NM_001137608	ZNF732	0.070102	0.0434528	0.0655976	0.0760783	0.0530951	0.0783543	0	0.276213	0.118133	0.0375548	0.103126	0	0	0.07821	0.185172	0	0	0
NR_024475	LINC00704	0.140204	0	0.163994	0.494509	0.929164	1.05778	0.147195	0.828639	1.33884	0.0375548	0	0.78197	0	0.195525	0.416636	0.169628	0	0.563751
NM_001256041	MYO1A	26.2532	36.0658	36.7675	37.9631	11.15	110.519	69.2554	114.628	107.816	66.81	53.2816	106.595	38.3122	42.1943	107.261	52.5848	34.4848	117.119
NM_000520	HEXA	37.119	30.2866	36.0787	30.0509	24.875	22.9186	24.5816	17.4014	26.0287	24.4482	20.0408	26.0108	37.322	40.9429	21.7577	18.7863	14.7358	16.9595
NM_198506	LRIT3	0.175255	0.0869055	0.131195	0.114117	0.10619	0	0.110397	0.552426	0	0.413103	0.171876	0.0823126	0.228502	0.586575	0.0462929	0.339256	0.0759577	0.0939584
NM_014840	NUAK1	3.78551	3.34586	4.46064	3.87999	4.11487	3.68265	6.73419	8.01018	3.38648	3.79304	6.63442	4.77413	6.01722	8.05563	3.56456	9.32955	6.60832	3.6174
NM_001136562	AKAP2	33.684	32.633	46.4103	46.8262	28.22	26.8363	30.2118	25.1354	46.5445	28.3163	44.1034	27.904	17.1757	14.899	36.1085	18.4895	17.7741	22.9259
NM_001242607	NCAM1	4.10097	3.60658	4.82142	3.00509	1.03535	3.2517	2.24473	4.41941	2.87457	0.788651	2.9219	2.88094	2.47544	2.69824	4.35154	1.35703	3.34214	2.77177
NR_024014	PP14571	0	0	0.0655976	0	0	0.82272	1.39836	1.93349	1.53573	0.375548	0.756255	1.11122	0.190418	0.39105	0.648101	0.0848141	0.227873	2.16104
NM_001130918	TTLL6	0.35051	0.47798	1.14796	1.52157	1.38047	12.1449	5.59342	10.4961	8.50559	1.95285	2.20002	12.5527	1.4091	1.48599	14.4897	1.48425	1.13937	12.7783
NM_001136016	APP	647.742	551.72	593.527	552.176	387.913	555.924	556.435	233.676	492.812	554.61	421.784	454.571	686.572	810.099	506.445	414.656	317.503	457.296
NM_001004063	OR4K1	0	0	0	0	0	0	0	0	0	0	0	0	0	0	0	0	0	0
NM_001204421	RGS6	0.490714	0.47798	0.459183	0.41843	0.21238	0.0391771	0.257592	0.552426	0	0.600877	0.103126	0.0411563	0.609338	1.25136	0.0462929	0.848141	0.835535	0.0469792
NM_001145474	TEX38	0.070102	0.0869055	0.295189	0.152157	0.0796426	0.391771	0.257592	0.276213	0.354399	0.112664	0.275002	0	0.266586	0.23463	0.0462929	0.424071	0.455746	0.375834
NM_001127388	DUX4L6	0.315459	0	0	0	0	0	0	0	0	0	0	0	0	0	0	0	0	0
NM_001168340	TTC39B	16.0884	18.5978	16.465	14.7592	23.5742	19.471	13.7628	13.8106	17.9956	15.6228	11.2751	17.4091	12.6057	17.7537	22.591	15.733	16.4069	22.1272
NM_058200	SPAG11B	0	0	0	0	0	0	0	0	0	0	0	0	0	0	0	0	0	0
NM_020312	COQ9	40.7643	35.6747	37.4234	21.7964	17.9461	44.6619	24.9864	13.8106	33.2742	24.6735	28.8065	42.8437	23.3834	27.0998	35.1363	18.9984	16.5588	30.9123
NR_030615	MIR877	1.22678	0.869055	1.41035	0.45647	1.24773	0.861897	0.588781	0.828639	0.984443	0.0751097	0.412503	0.699657	0.0761673	0.117315	0.0462929	0.127221	0	0
NM_014280	DNAJC8	16.0534	16.8162	19.3841	14.8353	24.7423	12.5367	13.5052	5.52426	16.8143	9.20093	15.5032	16.6683	16.9853	16.9716	17.2673	16.4539	13.9003	14.8454
NM_181079	IL21R	2.83913	1.99883	3.67347	7.72194	2.57511	1.01861	0.515184	1.38106	3.42586	1.72752	2.64689	1.15238	0.114251	0.351945	0.740687	0.72092	0.68362	0.657709
NM_020340	KIAA1244	99.1592	80.1269	73.1741	80.9853	72.4482	75.1026	153.488	103.856	78.5192	135.948	125.504	78.4439	103.626	147.152	52.1721	122.472	142.193	93.9584
NM_001097640	FUT3	62.3557	62.7892	62.5473	67.7097	56.7586	69.8137	30.1015	25.6878	54.8532	28.2037	35.8878	54.2852	41.9682	36.4067	41.0155	30.9996	29.0918	36.6438
NM_207412	C8orf86	0	0	0	0	0	0	0	0	0	0	0	0	0	0	0.0925859	0	0	0
NM_182948	PRKACB	61.4093	75.7816	45.9839	79.2736	23.5477	156.865	130.562	55.795	153.179	114.768	125.401	184.668	135.045	136.867	192.116	91.9385	63.2728	205.393
NM_001166412	SMOC2	16.8245	25.9413	9.01967	8.10234	5.94665	14.4955	1.39836	1.38106	5.4735	10.7031	13.2001	20.002	8.75924	6.10038	9.35117	5.13125	2.73448	13.0132
NM_002109	HARS	21.977	18.0763	21.1224	14.6451	28.3793	17.9823	20.0186	14.3631	21.1065	16.787	18.5626	18.9319	20.5652	24.7926	22.0817	15.521	13.9003	21.3755
NM_001103176	CNPY1	0	0	0	0	0	0	0	0	0	0	0	0	0	0	0	0.0424071	0	0
NM_000607	ORM1	0.105153	0	0.0327988	0	0	0	0	0	0	0	0.0687505	0.0823126	0	0	0	0	0.151915	0
NM_001185022	CLDN7	92.3944	95.9437	98.3636	186.962	183.045	314.201	76.6888	45.8514	182.201	73.1568	85.8006	191.089	108.691	96.4329	209.244	88.5035	54.6896	197.83
NM_138771	CCDC126	2.59377	3.08515	2.8207	3.38548	2.33618	3.72183	3.42229	0.828639	4.21342	2.7415	3.71253	3.45713	2.89436	2.46361	4.21266	5.4281	5.24108	4.65094
NR_033412	SH3GL1P1	0.490714	0.217264	0.787171	0.532548	0.530951	1.01861	1.28796	4.41941	0.393777	0.563322	0.171876	0.493876	0.41892	0.70389	0.324051	0.72092	2.35469	1.1275
NM_002117	HLA-C	375.326	324.722	375.612	316.6	276.811	466.796	160.737	83.9687	313.919	145.825	223.852	341.309	174.118	161.269	281.23	89.5637	87.0476	224.467
NM_018728	MYO5C	73.7473	79.9096	64.0561	77.1434	109.588	91.0477	102.522	118.495	101.437	91.2582	88.4131	105.031	95.2853	103.706	106.381	84.3901	94.9472	126.092
NM_001168378	ZIC4	0	0	0.0655976	0	0	0.0391771	0	0	0	0	0	0	0	0	0	0	0	0
NM_153036	FAM26D	0	0	0	0	0.0796426	0	0	0	0	0	0.206251	0	0	0	0	0	0	0
NM_020182	PMEPA1	77.4627	82.6037	73.6661	54.472	63.4752	37.7276	41.0675	61.3193	23.3116	48.5959	99.5507	17.8207	63.0284	117.862	13.2861	44.4002	29.5476	22.597
NM_004691	ATP6V0D1	71.9597	49.8838	78.3236	64.3622	51.635	106.601	66.4219	40.0509	138.058	49.8728	68.9567	135.569	62.4572	53.5347	130.87	53.9842	42.6882	140.421
NM_000771	CYP2C9	1.26184	1.95537	1.27915	2.47254	1.0619	0	1.83994	9.66745	0.669421	1.01398	0.481253	0.164625	0.190418	0.15642	0.324051	3.47738	2.20277	2.4899
NR_049776	GPC5-AS1	0	0	0	0	0	0	0	0	0	0	0	0	0	0	0	0	0	0
NM_001039783	TXNRD3NB	1.33194	1.12977	0.852769	0.646665	1.0619	0.27424	0.809574	0	0.551288	1.31442	1.58126	0.78197	1.14251	0.93852	0.462929	0.890548	1.06341	0.422813
NM_001256796	P2RX4	18.6471	15.2954	13.6771	11.8682	9.55711	41.2144	24.0664	21.5446	31.8566	11.7171	12.3063	24.1588	13.9005	16.9716	25.2759	11.4499	9.87451	23.6305
NM_001001317	PRSS58	0	0	0	0	0	0	0	0	0	0	0	0	0	0	0	0	0	0
NM_014820	TOMM70A	70.3123	96.7693	59.2674	62.6885	84.4212	55.2789	82.9446	34.2504	65.4458	84.7988	91.885	79.3494	87.9732	90.6063	81.4293	79.0892	76.1096	71.5024
NM_002282	KRT83	0	0	0	0	0	0	0	0	0	0	0	0	0	0	0	0	0	0
NM_001128921	MARK3	25.8676	22.1609	27.8462	24.6874	30.1049	25.9744	23.8824	23.2019	23.4691	27.4526	23.2377	23.6649	29.3244	27.4908	28.1924	32.6958	25.3699	29.315
NM_001004719	OR4M2	0	0	0	0	0	0	0	0	0	0	0	0	0	0	0	0	0	0
NM_032608	MYO18B	0.35051	0.0869055	0.0655976	0.228235	0.10619	0	0	0.552426	0.118133	0	0.0687505	0.0411563	0.304669	0.23463	0	0	0	0
NR_002576	SNORA21	0.035051	0.130358	0.163994	0.114117	0.238928	0.0391771	0	1.10485	0.354399	0.337993	0.240627	0.123469	0.0761673	0.195525	0.0462929	0.127221	0.455746	0.328855
NM_022437	ABCG8	1.50719	0.304169	1.08236	0.646665	0.31857	0	0.0367988	0.828639	0.118133	0.0751097	0.412503	0.0823126	0.152335	0.54747	0	0.339256	0.835535	0.281875
NM_013941	OR10C1	0	0	0	0	0	0	0	0	0	0	0	0	0	0	0	0	0	0
NM_001009811	AZI1	3.15459	2.91133	1.63994	1.78784	2.89368	1.48873	2.46552	5.52426	2.24453	2.44106	2.16564	1.81088	2.5516	1.95525	2.12948	2.3748	2.27873	1.50334
NM_002586	PBX2	14.1255	12.4275	19.0561	17.3458	13.2472	15.3183	15.1979	20.716	13.5853	12.2804	13.8188	10.4537	17.8231	15.2118	11.8973	16.1571	18.6856	13.3421
NM_001004760	OR51V1	0	0	0	0	0	0	0	0	0	0	0	0	0	0	0	0	0	0
NM_001139501	FGF13	0.736071	0.347622	0.327988	0.0760783	0.0796426	1.52791	1.28796	1.10485	1.772	0.751097	0.893756	2.01666	0.457004	1.13404	2.26835	0.466478	0.303831	1.78521
NM_001135005	DNAJB5	2.10306	1.21668	2.42711	1.29333	1.6194	1.52791	1.61915	3.59077	2.40204	0.488213	1.06563	2.34591	0.723589	1.32957	3.14792	0.339256	0.68362	2.95969
NM_006986	MAGED1	67.2628	77.2155	68.9431	49.6411	46.7768	66.2094	59.0989	43.6416	86.0797	45.8544	62.2192	76.6742	56.9731	53.1828	56.894	51.2701	30.3831	64.2676
NM_001276265	DUOXA1	18.4018	6.56137	8.72448	12.9713	6.4245	2.19392	1.58235	14.6393	1.69324	5.63322	4.0219	0	1.25676	2.22898	0	0.678513	0.303831	0.0939584
NM_032968	PCDH11X	0.105153	0.0869055	0.393586	0.228235	0.0265475	0.352594	0	0	1.69324	0	0.0343752	1.11122	0.0761673	0	0.185172	0.212035	0	0.328855
NM_001190738	NFIB	62.566	62.0505	53.6261	64.7046	51.104	67.3063	77.8295	48.8897	54.7744	49.6475	55.7223	52.6389	58.1918	65.188	50.1815	84.3476	61.6017	55.0127
NM_001137669	RGSL1	0	0.0434528	0.0655976	0	0	0.0391771	0	0	0	0	0.0687505	0.0411563	0	0	0	0	0	0
NM_173552	C3orf58	11.6369	11.5584	9.47886	9.50978	14.548	15.2007	11.5916	4.41941	12.719	17.463	15.847	15.5982	16.7568	11.6533	12.0825	15.3514	10.3303	16.2548
NR_073515	C16orf55	0.420612	0.0434528	0.623177	0.608626	0.610593	0.0783543	0.147195	0.828639	0.0787554	0.337993	0.378128	0.617345	0.114251	0.351945	0.324051	0.381664	1.06341	0.234896
NM_032449	CC2D1B	17.0348	14.9043	15.4154	11.7921	17.2559	21.6258	12.7692	16.5728	18.035	9.12582	10.897	15.4748	13.7101	14.3515	16.9432	11.2379	9.26684	14.7515
NM_152679	SLC10A4	0.140204	0.0869055	0	0.0380391	0.0530951	0	0.0735977	0	0.118133	0	0.103126	0.0823126	0	0	0.0462929	0	0	0.0939584
NM_003100	SNX2	36.1726	34.7188	27.4198	34.1591	29.0165	33.9274	37.9764	17.4014	37.4876	49.5348	30.9033	35.6002	58.0395	56.976	51.2	44.273	36.2318	59.3348
NM_030791	SGPP1	9.32356	10.9935	8.3965	5.2494	9.79604	10.6562	5.11504	3.59077	15.1998	9.27604	7.42505	7.49045	7.31206	7.15621	8.70307	8.82067	7.44386	12.9663
NM_003961	RHBDL1	0.280408	0.391075	0.360787	0.41843	0.371665	1.17531	0.367988	0.828639	0.708799	0.337993	1.82189	1.02891	0.342753	0.273735	0.509222	0.508885	0.151915	0.422813
NM_033437	PDE5A	17.7358	18.0329	15.5138	21.1878	8.28283	29.1478	35.8053	31.2121	19.0588	23.9975	20.2814	38.3577	25.5922	23.854	44.3486	26.674	22.1037	38.335
NM_004622	TSN	37.6798	46.0599	38.5714	41.2725	53.4933	31.851	43.2386	13.2582	37.4088	44.6151	47.2316	35.4356	44.8245	42.82	34.9049	35.2403	25.8256	36.9257
NM_014567	BCAR1	25.6573	15.1216	20.4993	20.7313	15.6896	34.2016	16.8171	19.0587	29.5727	9.08827	11.3095	21.1955	10.0922	9.50251	17.545	8.18456	7.29194	13.7179
NM_000299	PKP1	1.36699	1.08632	1.93513	1.10313	0.716783	0.27424	3.0911	2.76213	0.787554	8.29962	3.02502	0.370407	3.19903	9.4243	0.0925859	1.7811	4.25363	0.61073
NM_003420	ZNF35	4.59168	5.82267	5.01822	6.27646	6.79617	2.70322	4.67345	4.69562	6.49732	5.14501	7.90631	4.40373	5.21746	4.6926	3.24051	6.31865	6.38045	4.32209
NM_001179	ART3	0.245357	0.651791	0.196793	1.29333	1.30083	0	0.257592	0	0.196889	4.13103	1.82189	0.164625	1.94227	3.71497	0.185172	0.381664	0.303831	0.281875
NM_170665	ATP2A2	249.318	254.416	275.346	235.881	265.21	295.631	261.382	277.594	410.119	235.206	260.942	369.378	227.283	230.172	365.807	301.302	272.233	372.968
NM_001040021	CD14	40.9746	20.3793	45.5575	35.8329	11.5482	48.6972	11.7756	7.18154	19.5707	8.82538	14.1282	43.1318	11.6917	8.21205	43.0061	5.64014	4.93725	24.3822
NR_037446	MIR3675	0	0	0.0327988	0	0	0	0	0	0	0	0	0	0.0380837	0	0	0	0	0
NM_001663	ARF6	98.7737	107.806	95.2477	112.938	125.464	121.175	109.403	64.91	174.758	148.755	119.076	170.922	112.918	99.5613	184.385	124.125	110.67	188.763
NM_015399	BRMS1	8.938	12.7317	11.7092	8.90116	14.6808	16.0626	10.3037	13.5344	12.7584	7.77385	10.2438	13.3346	9.02583	10.2064	10.1844	7.33642	5.69683	9.11397
NM_018135	MRPS18A	26.0078	22.6389	22.5984	21.34	25.7246	27.5024	19.5034	14.6393	42.016	22.1198	21.9314	27.4101	20.946	19.1614	24.1186	18.235	12.1532	23.0668
NM_152250	DEFB105A	0	0	0	0	0	0	0	0	0	0	0	0	0	0	0	0	0	0
NM_207037	TCF12	96.4603	89.5996	61.6618	181.599	93.9252	53.9861	176.414	108.552	64.2644	171.4	103.469	48.0294	88.773	114.46	55.3201	95.6279	111.43	69.8111
NM_002263	KIFC1	2.90923	3.51967	2.8535	4.10823	8.097	1.60626	1.43515	2.76213	4.13466	2.96683	2.61252	1.317	3.23711	2.42451	2.40723	4.02867	3.87384	1.73823
NM_001034077	HIST2H4B	1.68245	2.17264	1.37755	4.48862	4.19451	4.46619	2.57592	1.65728	2.95333	0	3.23127	5.35032	0.875924	0.195525	0.740687	1.35703	0.455746	1.1275
NM_017899	TESC	2.13811	2.04228	6.69096	1.36941	3.55737	0.27424	0.735977	1.10485	0.748177	3.15461	1.95939	0.493876	1.56143	2.89377	0.324051	3.39256	2.73448	0.328855
NR_029628	MIR215	0	0.0434528	0.0327988	0	0	0.0783543	0.0735977	0	0.0787554	0	0	0.123469	0	0	0.0925859	0.0424071	0	0
NM_001258039	SPRY1	21.2409	20.8139	13.8411	22.2149	18.2382	8.77568	18.9146	21.5446	10.9076	21.1058	16.2939	10.2479	15.462	22.9546	10.2307	19.168	21.9518	8.69116
NM_144626	TMEM125	7.39576	6.86554	8.49489	9.47174	7.59259	17.1204	12.07	8.28639	16.0267	7.06031	8.31881	9.71289	8.64499	9.65893	8.24014	4.1983	1.9749	7.89251
NM_003939	BTRC	15.808	19.8579	17.8098	19.2858	20.2558	19.236	25.0968	15.7441	12.1283	19.1154	18.4251	17.4091	16.833	20.9212	18.4709	15.0545	15.4194	16.4427
NM_002650	PI4KA	25.9728	20.3359	28.699	21.8725	20.5212	26.8755	23.0729	27.6213	26.4618	14.8717	21.7252	24.0353	21.4792	18.8486	18.4709	18.0654	15.8752	22.7849
NR_046207	SLC12A2	869.475	1115.13	688.217	599.116	619.381	210.185	1049.5	486.411	233.234	1138.1	1051.16	242.575	1772.95	1578.16	254.056	1184.26	1185.7	427.558
NR_024603	MPDU1	30.4944	26.2455	30.6013	33.5505	33.6623	41.9587	26.0536	18.2301	41.701	20.8429	20.3845	35.6002	29.2482	26.2786	39.349	21.5852	15.4954	31.4761
NM_018360	TXLNG	21.5564	23.9425	20.8928	31.8768	53.9446	20.5288	29.5863	21.5446	16.1055	28.5792	26.4002	15.8863	36.8269	36.9933	16.4803	27.0557	30.3071	16.0669
NM_001006657	WDR35	13.74	9.73342	7.21574	11.678	9.79604	6.26834	7.28617	9.66745	6.30044	10.8533	11.4813	5.43263	15.6143	17.3235	6.5273	17.0476	22.9392	6.85897
NM_001168215	TMEM92	6.9401	5.60541	10.3972	13.656	17.3886	5.64151	4.45266	4.41941	5.19786	6.83498	6.3938	4.11563	6.93122	8.75952	3.84231	5.30088	4.32959	4.08719
NM_001305	CLDN4	288.329	219.393	254.748	165.698	300.81	577.667	189.735	133.135	531.599	141.507	184.011	396.788	102.255	116.689	331.272	133.582	118.494	302.452
NR_027053	LOC646214	7.57101	8.99472	7.24854	12.5529	13.9375	8.03131	9.23651	6.3529	8.97812	8.07429	7.76881	7.32582	6.89314	7.39084	6.5273	7.25161	5.69683	8.08043
NR_003528	LOC653501	2.97933	3.91075	2.29592	4.33646	2.07071	4.07442	3.64309	3.59077	2.1264	0.0375548	3.7469	2.18128	2.3231	2.03346	1.71284	1.1874	1.13937	0.939584
NM_202470	GIPC1	24.9213	23.1169	27.1246	27.7305	40.3257	85.8371	26.0168	35.9077	65.2883	13.3695	21.2095	70.048	20.489	19.9435	63.0047	24.8929	28.2563	52.006
NM_001170783	FAM122C	0.70102	0.738697	0.426385	0.608626	0.584046	0.979429	0.551983	0.828639	0.748177	0.675987	0.790631	0.576188	0.304669	1.05583	0.694394	0.636106	0.911493	0.751668
NM_001171933	CDH23	0.245357	0	0.295189	0.0380391	0.10619	0.705189	0.147195	0.276213	0.393777	0.187774	0	0.205782	0.0380837	0	0.138879	0.127221	0.0759577	0.375834
NM_014765	TOMM20	124.852	142.438	96.8221	106.015	108.553	57.6296	139.357	78.1683	63.1225	156.191	125.263	82.3538	136.758	158.141	64.6712	126.288	142.345	72.0661
NM_015997	RRNAD1	9.74417	8.86436	9.05247	5.78195	6.50415	7.48283	8.61093	9.66745	6.69421	5.70833	6.11879	7.1612	6.58847	6.76516	4.67559	4.49515	2.43065	5.63751
NM_001145365	ZNF652	72.3452	75.912	67.2704	74.4045	71.8907	101.273	92.7699	77.3396	82.9689	72.1804	85.285	96.5527	76.8147	74.9643	84.2069	92.8291	84.7688	109.837
NM_032620	GTPBP3	4.45148	4.30182	4.16545	4.3745	6.84926	2.93829	4.04787	3.86698	2.67769	3.00439	2.30314	1.44047	2.43735	2.18988	2.17577	4.41033	7.21598	2.77177
NM_001145945	SLCO1C1	0.175255	0.217264	0.131195	0.304313	0.690236	0.0391771	0.0367988	0	0.157511	0.0375548	0.103126	0.32925	0.266586	0.273735	0.324051	0.254442	0	0.281875
NM_020657	ZNF304	1.50719	0.695244	2.52551	2.8149	0.876069	3.91771	1.36156	0.828639	3.70151	2.70395	5.01879	4.03332	1.21868	1.21225	3.70344	1.2298	1.21532	2.95969
NM_001080955	PLAGL1	33.5087	33.5455	36.6035	23.7364	20.7071	26.0528	41.9875	57.4523	27.1312	23.5469	27.8096	21.8952	24.4878	21.234	16.1099	31.2116	33.6493	23.4426
NM_001199120	RPP21	14.1255	15.4692	14.7923	17.8784	17.6807	11.5181	11.9964	6.3529	10.3957	18.2516	9.96882	6.8731	24.0308	23.1893	12.8694	18.956	16.7867	13.483
NM_030760	S1PR5	0.490714	0.173811	0.26239	0.114117	0	0.156709	0.147195	0	0	0	0.103126	0	0.152335	0.195525	0.138879	0	0.379789	0
NR_003224	SNORD114-31	0	0	0	0	0	0	0	0	0	0	0	0	0	0	0	0	0	0
NM_001040438	C6orf48	44.2694	37.5866	47.9519	31.8007	31.9632	16.141	37.4244	29.2786	20.122	41.9112	51.9754	16.7095	56.7827	65.5791	19.3967	55.8501	88.7186	19.6373
NM_030932	DIAPH3	2.48862	4.56254	4.65743	1.97803	10.0084	0.744366	1.72955	7.18154	3.50462	4.61924	4.95004	2.634	4.79854	3.67587	3.74973	8.22697	7.67173	3.28855
NM_023068	SIGLEC1	8.30708	3.91075	8.88848	7.41763	7.06164	6.50341	3.42229	0.552426	5.86728	3.19216	3.09377	5.10338	2.01843	1.29046	3.65714	1.73869	1.06341	5.54355
NM_001010858	RNF187	18.1214	13.0793	17.8754	17.8404	21.2646	14.8873	13.6524	17.1252	13.1915	14.7215	12.6845	15.5159	13.9767	13.3348	9.8604	15.0121	16.9386	11.6039
NM_013980	BNIP1	2.41852	2.17264	2.8863	1.7498	2.7344	3.2517	2.39192	1.93349	3.81964	2.02796	2.64689	2.75747	2.24694	1.48599	2.36094	2.3748	2.27873	4.18115
NM_144648	LRGUK	0.315459	0.608339	0.590379	0.798822	0.21238	0.509303	0.220793	0.552426	0.315022	0.675987	0.343752	0.78197	0.342753	0.31284	0.138879	0.805734	2.12682	0.422813
NM_001099283	ZNF239	3.7154	4.99707	3.14869	3.72784	2.52202	0.940251	1.25116	0.552426	1.22071	6.57209	4.70941	1.89319	2.93244	3.83229	0.694394	3.90145	3.49406	1.1275
NM_001142364	ALG5	12.2328	14.9043	12.9555	10.4608	12.9286	10.7345	11.1132	3.86698	18.3894	17.0499	14.7814	14.5282	16.2617	14.2733	12.4528	12.298	7.74769	11.6978
NM_144570	HN1L	53.1723	61.8767	51.7893	50.6301	62.7053	42.9773	65.6491	30.1072	48.3558	53.5156	70.0224	57.2073	60.0198	55.7637	40.4137	47.4111	35.3963	41.8585
NM_032853	MUM1	8.16688	7.8215	8.1669	8.10234	12.026	12.615	10.4877	15.4679	9.84443	6.15899	6.9438	13.17	7.38823	5.78754	8.47161	10.3049	7.29194	9.16095
NM_001004735	OR5D14	0	0	0	0	0	0	0	0	0	0	0	0	0	0	0	0	0	0
NM_020890	KIAA1524	5.01229	6.73518	4.49344	5.59175	9.92878	2.70322	3.2015	6.62911	4.56782	9.57648	10.7938	3.95101	6.70272	6.21769	8.5179	13.1886	9.95046	5.30865
NM_058004	PI4KA	49.1415	39.8896	51.5925	46.2936	39.4762	52.1448	47.4705	58.5571	50.1672	36.8413	41.8347	47.7825	52.4031	46.4958	48.1447	42.2374	45.0429	49.5161
NM_031286	SH3BGRL3	211.147	151.389	199.122	361.714	226.318	271.067	178.364	188.377	523.842	119.312	222.786	356.331	267.766	257.115	400.619	257.029	223.392	383.679
NM_013430	GGT1	5.25765	4.17146	9.54445	15.8243	3.34499	34.7501	13.9836	20.4398	5.04035	4.46902	9.28132	5.63841	8.41649	7.62547	8.10126	5.3857	2.43065	8.50324
NR_024108	PFKL	69.2608	53.9249	75.2077	44.9242	43.0601	64.0938	58.1422	36.7363	67.454	47.8824	41.8347	49.5934	48.1758	46.2221	47.5891	32.7383	26.2054	37.2545
NM_001243925	MAPKAPK3	20.1894	17.8591	18.6625	21.5682	28.1138	11.9882	17.2587	7.18154	15.1604	18.9276	21.5877	16.6271	23.0406	20.0609	13.3787	19.3376	15.9511	11.1811
NM_001039693	TYW5	6.72979	5.82267	5.80539	5.55371	7.19438	6.97353	8.46373	11.3247	5.90666	9.16338	8.00943	7.07889	7.88332	6.99979	7.12911	9.88085	8.88705	8.3623
NM_001003693	LY6G6F	0.105153	0.0434528	0.0655976	0.114117	0	0	0	0.828639	0	0.300439	0.0343752	0	0.152335	0.273735	0	0.381664	0.303831	0
NM_005467	NAALAD2	0.595867	0.347622	0.229592	0.114117	0.238928	0.313417	0.147195	0	0.0393777	0.225329	0.137501	0.576188	0.685506	0.15642	1.20362	0.339256	0.455746	0.61073
NM_001017367	C4BPB	5.95867	6.51791	9.34766	2.4345	5.20332	1.80215	1.21436	2.48592	1.89013	0.713542	1.75314	1.89319	2.13268	1.95525	1.89801	1.69628	4.48151	0.986564
NM_153281	HYAL1	11.9524	13.818	9.11807	4.14627	8.38902	1.48873	6.80779	6.90532	1.49635	9.35115	10.0376	1.72857	7.08356	5.55291	0.277758	0.932955	2.20277	1.40938
NR_073552	LOC101059948	0	0	0	0	0.0265475	0	0	0.276213	0	0	0	0	0	0	0	0.0848141	0	0
NM_001193348	MEF2C	10.7256	10.8632	16.6618	23.318	8.49521	11.048	25.612	9.39124	20.0826	10.0271	9.62507	11.7707	7.84523	4.02781	9.53635	6.14902	2.65852	12.7783
NM_172373	ELF1	83.5265	87.4704	88.1632	99.5104	69.82	83.2122	99.6881	49.4421	74.8964	75.4101	93.0882	82.8888	85.9548	98.7792	86.5678	84.0932	57.0443	99.3611
NR_073008	CDK2AP1	31.3005	36.0223	34.7667	40.4356	36.6621	28.8736	32.1622	30.6596	44.1424	33.7618	37.0221	36.1352	49.3564	43.0546	38.7009	60.9814	49.3725	45.3819
NR_039659	MIR4454	0	0	0	0	0	0	0	0	0	0	0	0	0	0	0	0	0	0
NM_198525	KIF7	2.10306	1.43394	2.7551	3.27137	1.14154	0.470126	1.76634	4.97183	0.630044	3.30482	0.687505	1.11122	1.37101	1.48599	0.277758	2.4172	2.05086	0.140938
NM_001243747	API5	40.3086	44.4956	32.8644	39.827	53.3605	36.944	47.4705	25.6878	44.0637	67.7114	48.4347	43.6257	56.8589	52.3616	51.7092	66.5791	53.7021	54.4489
NM_001130012	SLC9A3R2	7.85142	7.0828	7.47813	4.5647	5.3626	7.40448	11.886	17.1252	9.29314	4.84457	6.11879	6.33807	6.74081	7.15621	5.55515	3.85904	6.00066	7.75157
NM_001256010	PNPLA8	19.4883	19.293	16.793	16.7372	15.9551	16.7678	14.7195	12.1534	26.58	20.3172	14.7126	15.804	21.5173	21.8597	16.8043	21.5004	19.5211	22.7379
NM_001134779	IPO11	16.0534	16.8597	13.3163	13.3517	28.6979	10.1077	17.8842	10.7723	13.5066	22.8333	19.9033	12.635	22.0504	21.3513	16.3414	25.6987	22.1037	16.2078
NM_001005855	ATP8B2	0.981428	0.78215	1.67274	1.02706	0.610593	0.901074	0.515184	0.552426	0.945065	0.675987	0.928132	0.740814	0.152335	0.117315	0.462929	0.508885	0.607662	0.469792
NM_001256129	ARL8A	4.41642	2.47681	2.6567	2.6247	3.02642	3.01664	1.65595	4.14319	2.55955	2.81661	2.37189	2.634	3.42753	2.97198	2.54611	2.84127	2.12682	2.77177
NM_032037	TSSK6	0.035051	0	0.131195	0.0760783	0.132738	0.117531	0.110397	0	0.0787554	0.225329	0.0687505	0	0.266586	0.273735	0.0462929	0.0848141	0.379789	0.0939584
NM_001104545	TMEM255A	0.981428	0.434528	0.655976	1.14117	0.849521	0.783543	0.515184	0	1.26009	0.187774	0.103126	0.699657	0.723589	0.15642	1.2962	0.551292	0.455746	1.1275
NM_182704	SELV	0	0	0	0	0	0	0	0	0	0	0	0	0	0	0	0	0	0
NM_006174	NPY5R	0.140204	0.695244	0.327988	0.190196	0	0	0	0	0	0.0751097	0.240627	0	0.0380837	0.039105	0	0.424071	0.151915	0.0939584
NM_001862	COX5B	37.0839	34.6318	32.6348	33.5125	25.8838	48.6188	24.692	28.1737	34.0224	45.5916	37.2284	44.3253	36.9411	31.4013	52.4962	29.9818	26.8131	45.4759
NM_001111018	NAV2	47.8095	37.8908	56.4795	39.9031	25.6449	23.1929	28.1143	30.9359	19.3738	44.9907	48.5722	21.072	31.3428	35.7811	22.5447	44.0185	49.4485	19.6373
NM_016422	RNF141	30.7748	27.2449	22.0736	31.6866	23.4415	33.1047	43.4962	15.4679	39.4565	44.4274	40.9753	34.1597	41.1684	45.7528	29.5349	33.544	38.7384	34.6707
NR_073196	ACBD5	63.0217	73.4352	38.0138	56.4881	57.8205	47.5219	91.9603	43.0892	46.2294	87.8407	61.2223	49.2229	68.0555	76.8804	57.9125	68.2754	52.5628	66.5226
NM_005361	MAGEA2	0	0	0	0	0	0	0	0	0	0	0	0	0	0	0	0.169628	0	0
NM_001039763	TMEM232	0.175255	0.130358	0.196793	0.342352	0.0265475	0.391771	0.478385	0	0	1.08909	0.481253	0.617345	0.380837	0.46926	0.370344	0.381664	0.455746	0.563751
NR_038971	LINC00641	0.525765	0.78215	0.655976	0.304313	0.822974	1.09696	1.21436	0.828639	1.26009	1.01398	1.16876	0.78197	0.266586	0.977625	0.972152	1.65388	1.82299	1.69125
NM_001168239	ABL2	23.1687	22.4216	20.86	21.2258	28.2466	20.9989	28.0775	20.1635	21.6971	20.4298	24.3033	20.1254	17.2519	20.1782	17.4061	24.1296	26.5092	19.4964
NM_032468	ASPH	86.3306	73.2179	53.6917	78.4367	117.845	103.78	105.76	68.777	153.022	100.159	120.691	134.54	132.912	146.917	158.229	186.718	197.49	174.011
NR_027154	SMG1P1	40.9396	38.3688	38.7682	40.9301	45.6618	62.4484	62.742	573.418	44.615	14.5337	33.7565	36.0118	23.9546	26.0048	29.396	36.0036	102.999	40.731
NM_001013253	LSP1	9.77923	5.60541	12.4963	10.8792	4.96439	7.95296	2.87031	1.65728	8.15119	3.00439	4.46878	4.69182	2.62777	2.26809	3.79602	2.88368	3.49406	3.42948
NM_134258	TBL1Y	0.210306	0.0869055	0.163994	0.228235	0.185833	0.352594	0.294391	0.552426	0.236266	0.901316	0.550004	0.493876	0.380837	0.15642	0.925859	0.424071	0.455746	0.61073
NM_001272044	RPS6KB1	21.2058	24.377	20.0401	18.2968	36.8214	20.568	22.8521	26.7927	21.3033	29.8561	25.8502	22.636	26.5062	28.5466	28.1461	31.2964	29.3956	33.872
NM_001146728	HRASLS5	0.490714	0.564886	0.623177	1.0651	1.6194	0.352594	0.183994	0	0.236266	0.375548	0.171876	0.164625	0.228502	0.70389	0	0.127221	0.607662	0.187917
NR_036468	CIDEA	0	0	0	0	0	0	0	0	0	0	0	0.0823126	0	0	0	0	0	0
NM_001130705	ADAM29	0	0	0	0	0	0	0	0	0	0	0	0	0	0	0	0	0	0
NR_002556	LOC388242	0.490714	1.47739	0.787171	1.44549	0.716783	1.25367	1.47195	0	3.22897	0	0.412503	2.22244	0.723589	0.430155	1.9906	0.127221	0.151915	1.3624
NM_001277115	DNAH11	9.60397	8.77746	8.88848	6.9992	7.43331	3.29088	7.35977	4.14319	5.8279	7.21053	9.00631	8.06664	5.21746	5.74843	4.95334	7.42124	5.54491	6.24824
NM_015346	ZFYVE26	27.7954	22.4216	23.7135	25.2199	31.6978	28.756	23.4041	39.2222	20.2795	23.1713	21.2783	18.1088	21.0983	22.4072	22.0354	21.3732	20.9643	20.2011
NM_001039395	SPATA6L	2.10306	1.82502	1.93513	3.3094	2.57511	2.38981	9.5677	10.4961	1.92951	5.59567	3.71253	3.90985	1.06634	2.65914	1.38879	5.04644	4.93725	3.66438
NR_033855	LINC00485	0	0	0.0327988	0	0	0	0	0	0	0	0	0	0	0	0	0	0	0.0939584
NM_001204055	NDUFC2	20.645	22.5085	18.2361	21.1878	20.946	19.5886	17.7002	6.90532	21.6577	25.4246	21.9314	24.4468	22.8883	21.8988	22.2206	22.4333	19.749	18.5568
NM_001136201	ISOC2	15.4575	11.2977	16.5634	19.476	18.7957	14.0254	10.5245	7.45775	12.8371	7.17297	7.45943	11.4415	9.44475	6.53053	7.8698	7.97253	7.14003	7.79855
NM_198271	LMOD3	0.140204	0.0869055	0.327988	0.114117	0.132738	0.235063	0.220793	0.828639	0.354399	0.0375548	0.0687505	0.78197	0.342753	0.23463	0.231465	0.0424071	0.303831	0.140938
NM_022773	LMF1	4.87209	1.95537	6.19897	4.5647	2.6813	4.9755	2.90711	7.18154	2.59893	2.62884	3.64378	3.21019	1.82802	2.46361	2.26835	4.02867	4.48151	2.44292
NM_153689	C2orf69	13.1792	16.1644	10.7908	11.64	21.4239	14.5347	13.2476	12.4296	16.7355	13.6324	13.647	15.1044	17.8612	14.7035	19.4893	17.7686	18.9894	19.2145
NM_001011547	SLC5A9	0.420612	0.999413	1.44315	1.5596	0.584046	8.38391	8.02215	11.6009	2.40204	2.36595	1.23751	2.01666	1.78993	1.25136	1.38879	1.8235	1.59511	0.892605
NM_001077397	IRF2BP2	298.039	320.681	230.084	261.861	241.45	220.097	391.061	219.589	167.867	335.252	373.968	267.351	288.027	339.94	200.541	366.482	283.702	229.728
NM_004279	PMPCB	39.6777	44.0176	49.2638	46.2936	38.4143	38.2761	52.0704	33.698	40.1653	56.6702	47.4722	43.8726	62.2287	71.6794	53.6998	77.5201	66.9188	60.9321
NR_033742	FRMD8P1	0.105153	0.130358	0	0	0.0796426	0.195886	0	0	0.118133	0.0751097	0	0.123469	0.0380837	0.07821	0.0925859	0	0	0
NR_031578	MIR1298	0	0	0	0	0	0	0	0	0	0	0	0	0	0	0	0	0	0
NM_016834	MAPT	0.315459	0.130358	0.459183	1.40745	5.52189	0.352594	0.294391	0	0.472533	0.337993	0.515629	0.246938	0.0761673	0.39105	0.370344	0	0.759577	0.704688
NR_046368	HP07349	0.525765	0.217264	0.426385	0.722744	0.424761	1.01861	0.515184	0.276213	0.118133	0.150219	0.825006	0.576188	0.304669	0.46926	0.185172	0.212035	0	0.140938
NR_049751	RTN3	84.7883	102.679	85.5721	118.492	104.624	91.4786	87.8388	34.5266	77.2985	90.8827	104.707	104.208	127.542	120.952	90.6879	97.1122	64.1843	90.1531
NR_027472	LOC642929	0	0	0	0	0	0	0.0735977	0	0.0393777	0	0	0	0	0	0	0	0	0
NM_001174087	NCOA3	72.9762	65.8744	73.3709	80.8712	66.8998	66.6011	67.4155	59.3858	87.7729	72.9315	80.2318	63.3807	63.2569	72.9308	71.0597	97.2818	90.0859	81.415
NM_001199041	STRA6	1.33194	0.564886	0.983964	0.760783	0.451308	0.27424	2.06074	6.62911	1.0632	1.5773	0.687505	0.164625	0.342753	0.7821	0.138879	1.90832	2.12682	0.375834
NM_145062	ZUFSP	3.82056	4.73635	2.59111	2.70078	4.88475	4.54455	3.86388	1.65728	5.67039	5.78344	4.05628	6.13229	5.56021	5.12275	5.78662	5.85217	4.02576	5.21469
NM_000786	CYP51A1	61.2341	73.9131	48.2798	43.4027	130.959	69.8137	52.7695	6.62911	101.437	78.2643	107.87	107.253	61.4289	62.9981	108.835	93.1683	93.2761	126.75
NM_173567	EPHX4	2.31337	0.912508	1.11516	5.62979	6.37141	0	0.0367988	0.276213	0.0787554	4.99479	1.20313	0.0823126	6.09338	5.98306	0.0925859	1.8235	0.835535	0.0939584
NM_001277053	TRABD2A	32.7376	40.3242	25.6159	29.3662	21.238	32.7913	54.6831	58.2809	30.3996	29.443	31.7971	48.2352	26.392	26.9824	24.5816	24.4265	21.572	32.8385
NM_173490	TMEM171	21.1708	24.9853	19.2529	35.6807	11.7075	88.3836	47.1025	13.8106	62.965	14.3459	16.2595	95.1945	19.4607	12.4745	49.9964	14.8425	8.35535	89.5424
NR_051983	LINC00462	0	0	0	0	0.0265475	0.0783543	0	0	0	0	0	0	0.0761673	0	0	0	0	0
NM_000537	REN	3.11954	0.47798	0.655976	1.33137	0.902616	0.195886	0.0367988	0	0.118133	0.901316	3.6094	0.535032	5.06513	2.26809	0.0925859	4.49515	1.9749	0.0469792
NR_049834	MIR4524B	0	0	0	0	0	0	0	0	0	0	0	0	0	0	0	0	0	0
NR_039786	MIR4643	0	0	0	0	0	0	0	0	0	0	0	0	0	0	0	0	0	0
NM_018034	WDR70	7.64112	7.1697	7.87171	6.96116	7.75188	5.83739	6.88138	6.62911	5.43413	8.93805	8.42194	6.04998	10.5873	13.1393	6.85136	10.1777	9.49472	9.58376
NM_001164279	SLC37A4	24.7109	21.2049	27.6494	16.2807	19.2735	33.0655	26.532	16.2966	37.842	19.2281	18.4251	23.7883	18.2802	15.0554	23.6557	15.2241	18.3058	21.0467
NR_027307	MEF2BNB-MEF2B	3.75046	3.73694	5.05102	9.43371	5.01748	3.56512	1.80314	1.38106	4.37093	1.95285	2.57814	2.22244	2.17077	2.26809	3.74973	2.24757	1.82299	3.19459
NM_001163122	RDM1	0.35051	0.260717	0.229592	0.266274	0.477856	0.0783543	0.0735977	0	0.433155	0.225329	0.0687505	0.164625	0.41892	0.430155	0.370344	0.254442	0.0759577	0.140938
NM_001146039	GORAB	1.6474	1.95537	1.04956	1.52157	1.40702	1.76297	2.17113	1.65728	2.99271	1.84019	1.13438	2.55169	1.33293	1.32957	2.17577	0.932955	1.51915	1.73823
NM_181426	CCDC39	0.280408	0.0434528	0.229592	0.228235	0.238928	0.509303	0.220793	0.828639	0.393777	0.600877	0.378128	0.617345	0.380837	0.15642	0.416636	0.169628	0.759577	0.892605
NM_145699	APOBEC3A	0.665969	0.304169	1.14796	0.342352	0.265475	0.27424	0.110397	0	0.590666	0	0.171876	0.493876	0.304669	0.15642	1.43508	0.169628	0.303831	0.845626
NR_039781	MIR4638	0	0	0	0	0	0	0	0	0	0	0	0	0	0	0	0	0	0
NR_033954	P2RX7	0.806173	0.521433	0.459183	1.21725	1.03535	0.705189	0.441586	0.552426	0.590666	0.525768	0.584379	0.535032	0.342753	0.15642	0.416636	1.06018	0.455746	0.516771
NM_181441	MRPL55	6.76484	7.34352	9.74125	6.58077	9.98187	6.03328	4.37906	3.03834	7.5999	4.91968	5.29379	6.09113	4.07495	4.14513	4.02749	5.17366	4.25363	3.28855
NM_020451	SEPN1	75.7452	58.3571	72.1574	85.6261	99.8187	64.7206	110.507	38.3936	74.542	35.6395	60.8098	85.6463	79.7852	62.3333	57.681	52.4575	50.1321	49.1872
NM_016931	NOX4	0.070102	0.0434528	0	0.114117	0.0530951	0	0.110397	0	0	0.187774	0.137501	0	0.114251	0.195525	0	0.0848141	0.379789	0.140938
NM_001014812	FAM96A	27.2697	35.1967	21.7456	23.5843	26.8661	28.9911	26.8264	11.3247	27.2888	39.733	35.7503	38.3988	32.0284	33.4739	37.2195	28.0311	27.5727	36.9257
NM_001007471	TRPM3	0.105153	0.0869055	0	0	0.0530951	0.626834	0.0367988	0	0.196889	0.225329	0.0343752	0.0823126	0.0761673	0	0.231465	0.0848141	0.227873	0.187917
NM_181873	MTMR11	46.2323	52.0129	32.3724	29.8607	15.8223	52.6149	57.2958	78.9969	39.6927	56.8956	25.3002	45.4777	21.7838	35.3118	60.1345	24.6809	25.9775	60.9321
NR_051994	DIAPH3-AS1	0	0.304169	0.0655976	0.0760783	0.371665	0	0	0.552426	0.0787554	0.150219	0.206251	0.0823126	0.228502	0.039105	0.185172	0.212035	0.531704	0.0939584
NM_197977	ZNF189	10.1648	7.25661	8.3965	9.28155	11.7075	8.34473	7.58056	8.28639	6.10355	8.29962	8.90319	5.1857	9.02583	10.8321	7.96239	12.0436	10.4062	8.50324
NR_034115	STXBP5-AS1	2.94428	2.12919	2.7223	1.94	2.01761	4.70126	2.87031	8.5626	3.54399	1.5773	1.89064	2.96325	1.25676	1.68151	2.96275	4.1983	3.49406	5.73147
NM_015523	REXO2	24.2202	24.9853	17.1866	23.28	50.0952	12.4975	25.0232	12.982	14.7666	31.9967	21.3814	18.8084	38.3122	39.4178	20.9707	24.8929	22.6354	16.8655
NM_006595	API5	48.8961	53.6207	39.4898	45.4568	64.484	43.3691	55.6766	31.7645	55.5226	80.1796	57.2004	52.6801	68.1697	64.1713	62.8195	79.4708	59.5509	64.4085
NR_046409	POLD3	18.6471	18.3805	24.1727	15.6721	33.2906	19.6669	15.5291	9.11503	54.42	19.9792	15.9845	18.9319	19.0799	14.7035	29.6738	24.5961	20.8884	32.0398
NM_001195430	DCLK1	0.140204	0.260717	0.0983964	0.228235	0.238928	0.235063	0.183994	0.276213	0.393777	0.225329	0.412503	0.32925	0.380837	0	0.0925859	0.381664	0.379789	0.140938
NM_001077497	PRR3	3.32984	1.99883	4.55903	4.60274	2.97332	3.44759	4.85745	5.80047	2.16577	4.20614	3.57503	2.634	2.66586	2.3854	2.5924	3.26534	5.08917	3.28855
NR_036271	MIR4315-2	1.33194	1.08632	1.01676	1.52157	2.1238	1.72379	0.772776	2.48592	1.57511	0.638432	0.687505	1.02891	0.685506	0.586575	1.2962	0.254442	0.607662	0.892605
NM_001083308	PYDC2	0	0	0	0	0	0	0	0	0	0	0	0	0	0.039105	0	0	0	0
NR_023915	IPW	2.24326	2.303	2.91909	1.67372	0.690236	4.50537	1.32476	2.48592	2.55955	1.31442	8.83444	3.12788	1.25676	2.62003	4.35154	1.65388	0.835535	4.65094
NM_032206	NLRC5	34.5953	30.9384	40.3753	23.4321	28.8306	32.2428	8.50053	24.8592	19.7282	15.0595	19.0439	17.7384	10.2826	7.54726	29.3497	10.9834	27.8005	26.2614
NM_001242	CD27	6.41433	4.12801	8.3309	12.7431	4.08832	2.7424	2.53912	2.2097	6.26106	3.68037	4.88128	2.2636	1.25676	1.40778	1.43508	3.35016	1.59511	1.55031
NM_013993	DDR1	78.4792	76.2161	92.8862	67.7477	56.8383	101.626	91.0771	99.1605	89.86	61.7401	67.788	84.2881	71.6353	80.1652	68.1432	46.5205	52.4108	66.2877
NM_001190730	RALGPS1	2.80408	3.2155	2.95189	1.48353	1.75214	4.46619	3.64309	5.52426	2.44142	3.53015	3.54065	3.21019	3.46561	3.75408	4.30524	3.0109	2.65852	5.40261
NM_001267056	CASP7	66.3515	64.397	56.8403	40.5497	37.4851	80.1564	47.3233	29.2786	79.5824	23.2464	38.5347	103.467	31.6475	39.4569	107.261	33.6712	29.1678	113.173
NM_001018067	SERBP1	135.507	181.415	119.847	125.035	190.054	106.562	173.359	71.5392	146.367	197.839	196.558	155.777	189.809	162.247	135.361	187.27	156.397	145.213
NM_001204356	SPOCK3	0	0	0	0	0	0.0391771	0	0	0	0	0	0.123469	0	0	0	0.0848141	0	0
NM_001243281	ALCAM	27.8305	23.6383	24.0743	19.476	46.4582	14.2605	24.4712	12.982	17.5231	13.9704	29.0127	14.8574	40.3306	42.8591	18.3783	26.5468	19.749	19.7313
NM_170753	PGBD3	2.17316	2.73752	2.32872	2.05411	1.83178	1.84133	4.82065	5.24805	1.85075	2.85417	2.50939	2.46938	2.93244	2.22898	1.71284	3.05331	1.67107	2.91271
NM_176875	CCKBR	0	0	0	0	0	0	0	0	0	0	0	0	0	0	0	0	0	0
NM_001142767	PCDH15	0	0	0	0.0760783	0.0530951	0.0783543	0	0	0	0	0	0.0823126	0	0	0	0	0	0
NM_001242792	SNAP91	0.070102	0.130358	0.0655976	0.646665	0.185833	0.470126	0	0	0.708799	0	0	0.246938	0	0	0.185172	0.0424071	0.227873	0.187917
NR_003047	SNORD19	0.35051	0.434528	0.327988	0.41843	0.530951	0.117531	0.846373	0.276213	0.354399	0.0375548	0.343752	0.370407	0	0.039105	0	0	0	0.0939584
NM_001033032	FAIM	4.52158	5.47505	3.05029	5.21136	4.96439	2.31145	4.34226	2.48592	2.8352	6.60965	5.53441	2.14013	7.38823	8.29026	2.40723	4.45274	4.02576	3.14761
NM_001185081	FMR1	19.3832	23.2907	11.2828	18.487	29.5209	19.6669	17.2219	12.4296	17.1687	26.8893	17.1532	22.2656	23.6119	21.7033	28.609	31.4236	25.142	27.201
NM_030917	FIP1L1	29.4428	27.9401	28.0758	31.9909	38.7329	25.9744	35.1429	32.3169	31.069	39.3575	30.2846	28.2744	46.1574	46.4958	44.2098	42.6191	33.6493	42.7981
NM_001160331	NFASC	9.91943	8.03876	12.2668	11.0313	7.56605	15.2791	9.4573	19.3349	8.82061	9.65159	7.28755	12.5115	7.23589	8.56399	12.5917	6.0218	11.9254	11.228
NM_022063	FAM204A	10.0596	12.2971	10.3644	12.0584	13.0614	10.8129	11.518	11.6009	10.8683	14.8717	13.0282	12.0176	17.3281	17.0498	15.0452	17.09	12.533	15.6911
NM_199126	ZNF585A	7.74627	7.99531	7.21574	11.5639	9.61021	8.50144	8.46373	8.5626	7.56052	9.7267	9.69382	8.39589	10.2445	12.1617	8.14756	10.6866	17.0145	9.20793
NM_018161	NADSYN1	35.8572	36.9783	40.7361	30.7737	24.6361	35.3378	26.4584	82.5877	34.3374	32.6351	26.5033	43.3788	36.6365	31.284	32.4976	24.3417	34.181	31.8989
NM_004934	CDH18	0	0	0	0	0	0	0	0	0.0787554	0	0	0	0.0380837	0	0	0	0	0
NM_017938	TMEM255A	1.22678	0.47798	0.81997	1.63568	1.0619	0.861897	0.588781	0	1.49635	0.187774	0.103126	0.699657	0.799757	0.195525	1.43508	0.593699	0.455746	1.31542
NR_028319	NLGN4Y	1.9278	1.99883	2.19752	0.0760783	0.132738	0.156709	1.06717	1.10485	2.00826	0.600877	0.825006	1.19353	0	0.07821	0.0925859	0.932955	0.151915	1.55031
NM_020999	NEUROG3	0	0	0	0.0380391	0.21238	0.313417	0	0	0.393777	0	0.137501	0.411563	0	0	0.555515	0	0	0.892605
NM_012418	FSCN2	0.245357	0.173811	0.0983964	0	0	0.0391771	0.294391	1.10485	0.118133	0.0751097	0.103126	0.0411563	0	0.039105	0.0462929	0.169628	0.227873	0
NM_001161364	NPTN	36.0324	34.7622	30.4701	31.6486	30.5828	47.6394	40.4787	46.9562	55.7589	44.6527	37.3315	58.195	36.5222	33.8649	65.6434	43.2128	40.5614	57.9254
NM_018313	PBRM1	71.2236	84.9067	68.1887	70.5246	73.5101	66.6795	70.8378	73.4726	67.7691	79.128	93.535	76.3861	79.0997	83.1372	71.3837	91.048	80.0594	91.9853
NR_002330	ST7-AS1	1.05153	1.12977	1.57434	0.722744	1.14154	0.626834	1.17756	0	0.787554	0.563322	0.72188	0.905439	0.342753	0.351945	0.740687	0.763327	0.227873	0.234896
NM_001146340	NKX1-2	0	0	0	0	0	0	0	0	0	0	0	0	0	0	0	0	0	0
NM_178497	C4orf26	0.070102	0	0.0327988	0.114117	0	0	0.0735977	0	0.0787554	0	0	0	0	0	0	0	0	0
NM_001161566	TNIK	40.7292	45.4081	32.4052	36.974	23.2556	18.2174	38.7492	37.565	18.4682	40.6719	35.1659	24.8173	46.8429	48.9985	25.5537	35.2827	31.0667	30.4895
NR_030383	MIR661	0	0	0	0	0	0	0	0	0	0	0	0.0411563	0	0	0.0462929	0	0	0
NM_004366	CLCN2	3.08449	4.08456	4.59183	5.81999	2.99987	29.4612	4.63665	4.97183	22.8391	4.09348	5.25941	27.1632	4.53195	4.22334	27.6832	5.21607	3.72193	29.503
NR_028080	FAM172A	9.49882	13.2531	8.56049	12.2486	5.76082	9.12827	15.6763	11.3247	9.29314	15.773	12.6157	7.07889	12.9484	17.8319	10.4622	14.6728	11.3937	10.2415
NR_027286	FLVCR1-AS1	0.420612	0.608339	0.524781	0.646665	0.876069	0.666011	0.110397	0	0.157511	0.375548	0.412503	0.288094	0.41892	0.508365	0.601808	0.169628	0.0759577	0.281875
NM_001199240	GPANK1	3.54015	3.47622	3.47667	3.15725	4.16796	4.03525	3.49589	4.41941	3.62275	3.71793	2.81877	2.2636	2.58969	2.3854	1.71284	1.7811	1.9749	2.53688
[truncated: 39,088 more rows]

## Sheet: mtDNA RNAseq Expression
GENE ID		ISTA02_N	G_NG_NG1	ISTA01_N	ISTA03_N	G_NG_G1	ISTA03_IIa	ISTA02_IIa	G_NG_G2	ISTA02_Is	ISTA01_IIa	ISTA03_Is	ISTA01_Is
ENST00000361227.2	MT-ND3	2242	2932	5112	2507	3552	4737	1841	4427	2509	5757	2807	1425
ENST00000361335.1	MT-ND4L	69931	73755	111504	111284	92205	62326	50042	68295	63270	214001	69921	59734
ENST00000361381.2	MT-ND4L	188889	209705	207980	237410	223340	185815	138659	198248	173529	343493	166746	104582
ENST00000361390.2	MT-ND1	36097	37934	56446	60204	42814	51695	40948	45084	64717	72474	52132	21318
ENST00000361453.3	MT-ND2	39309	35149	46303	58934	74003	49612	38218	58226	45470	114500	49324	19241
ENST00000361567.2	MT-ND5	129995	88192	107360	124558	78159	88208	49363	71264	75781	133710	69921	62401
ENST00000361624.2	MT-CO1	1337901	967022	1475067	1871621	963540	839886	760628	941193	879605	1900557	912614	601511
ENST00000361681.2	MT-ND6	7353	4929	5607	7402	5809	7110	5468	4821	11235	6434	6033	5429
ENST00000361739.1	MT-CO2	212693	279309	262902	258358	272178	174156	175058	220101	197780	380747	185724	125745
ENST00000361789.2	Cytb	126741	194379	171556	155632	186431	149834	114252	174799	110103	321542	121428	83695
ENST00000361851.1	mitochondrially encoded ATP synthase 8	782	776	1017	1111	917	1269	813	551	947	830	830	573
ENST00000361899.2	mitochondrially encoded ATP synthase 6	46389	48950	45307	60810	44428	47051	33592	33319	45172	64118	44391	24304
ENST00000362079.2	mitochondrially encoded cytochrome c oxidase III	183619	225670	228744	250780	200076	151615	186726	163456	274594	268452	183958	101127
ENST00000386347.1	mitochondrially encoded tRNA leucine 1 (UUA/G)	0	0	0	0	0	0	0	0	0	0	0	0
ENST00000387314.1	mitochondrially encoded tRNA phenylalanine	22	5	0	27	8	6	4	12	5	0	2	0
ENST00000387342.1	mitochondrially encoded tRNA valine	0	0	0	0	0	0	0	0	0	0	0	0
ENST00000387347.2	mitochondrially encoded 16S RNA	12985506	12437974	11998579	14147513	13567735	14670046	14731447	16398092	25219917	12478089	13305132	8003407
ENST00000387365.1	mitochondrially encoded tRNA isoleucine	0	0	0	0	0	0	0	0	0	0	0	0
ENST00000387372.1	mitochondrially encoded tRNA glutamine	0	0	0	0	0	0	0	0	0	0	0	0
ENST00000387377.1	mitochondrially encoded tRNA methionine	0	0	0	0	0	0	0	0	0	0	0	0
ENST00000387382.1	mitochondrially encoded tRNA tryptophan	0	0	0	0	0	0	0	0	0	0	0	0
ENST00000387392.1	mitochondrially encoded tRNA alanine	0	0	0	0	0	0	0	0	0	0	0	0
ENST00000387400.1	mitochondrially encoded tRNA asparagine	16	8	25	22	2	6	5	6	6	9	5	3
ENST00000387405.1	mitochondrially encoded tRNA cysteine	26	15	39	39	2	19	5	3	6	12	5	5
ENST00000387409.1	mitochondrially encoded tRNA tyrosine	0	0	0	0	0	0	0	0	0	0	0	0
ENST00000387416.2	mitochondrially encoded tRNA serine 1	0	0	0	0	0	0	0	0	0	0	0	0
ENST00000387419.1	mitochondrially encoded tRNA aspartic acid	0	0	0	0	0	0	0	0	0	0	0	0
ENST00000387421.1	mitochondrially encoded tRNA lysine	7	3	1	7	2	1	5	3	5	0	3	0
ENST00000387429.1	mitochondrially encoded tRNA glycine	0	0	0	0	0	0	0	0	0	0	0	0
ENST00000387439.1	mitochondrially encoded tRNA arginine	0	0	0	0	0	0	0	0	0	0	0	0
ENST00000387441.1	mitochondrially encoded tRNA histidine	0	0	0	0	0	0	0	0	0	0	0	0
ENST00000387449.1	mitochondrially encoded tRNA serine 2 (AGU/C)	0	0	0	0	0	0	0	0	0	0	0	0
ENST00000387456.1	mitochondrially encoded tRNA leucine 2 (CUN)	0	0	0	0	0	0	0	0	0	0	0	0
ENST00000387459.1	mitochondrially encoded tRNA glutamic acid	0	0	0	0	0	0	0	0	0	0	0	0
ENST00000387460.2	mitochondrially encoded tRNA threonine	0	0	0	0	0	0	0	0	0	0	0	0
ENST00000387461.2	mitochondrially encoded tRNA proline	162	203	62	191	154	129	33	170	120	174	129	42
ENST00000389680.2	mitochondrially encoded 12S RNA	5685851	6103651	5224665	6092465	5354017	5140964	4173050	5488801	7193817	5942916	5021448	3347750

## Sheet: WGBS Read counts
WGBS Read counts
Samples	Chrom	Read count
NY4	hg19	754348
NY5	hg19	1211942
NY6	hg19	699840
NY7	hg19	654484
NY8	hg19	718912
NY9	hg19	638926
NY10	hg19	952958
NY11	hg19	150610
NY12	hg19	1225090
NY4	chrM	2666
NY5	chrM	6596
NY6	chrM	3112
NY7	chrM	1788
NY8	chrM	1590
NY9	chrM	2124
NY10	chrM	3496
NY11	chrM	528
NY12	chrM	2324
